# Supplementary material for: The Kidney Transcriptome and Proteome Defined by Transcriptomics and Antibody-Based Profiling
Source: PubMed Central journal article supplement (PMC4281243; doi:10.1371/journal.pone.0116125), 2014-12-31
Supplement: pone.0116125.s003.pdf [file pone.0116125.s003.pdf]

Table S1. The top 30 expressed genes in kidney, ranked by FPKM values

| Gene_name | Description                                                        | SP/TM-category | Category              | Proteinclasses          | TS-score | Max fpkm | Max other | Mean fpkm | Kidney fpkm | Kidney enhanced score |
|-----------|--------------------------------------------------------------------|----------------|-----------------------|-------------------------|----------|----------|-----------|-----------|-------------|-----------------------|
| J01415.25 | ATP synthase protein 8                                             | TM             | Expressed in all high |                         | 1,3      | 24076,8  | 18658,6   | 7896,0    | 15484,5     | 2,0                   |
| MT-CO1    | mitochondrially encoded cytochrome c oxidase I                     | TM             | Expressed in all high | Transporters,Enzymes    | 1,5      | 19182,9  | 12381,1   | 6779,9    | 12381,1     | 1,8                   |
| MT-CO3    | mitochondrially encoded cytochrome c oxidase III                   | TM             | Expressed in all high | Transporters            | 1,5      | 14940,2  | 10224,0   | 5752,4    | 10224,0     | 1,8                   |
| MT-ATP6   | mitochondrially encoded ATP synthase 6                             | TM             | Expressed in all high |                         | 1,9      | 17009,0  | 8976,6    | 5300,3    | 8976,6      | 1,7                   |
| MT-ND4    | mitochondrially encoded NADH dehydrogenase 4                       | TM             | Expressed in all high | Enzymes                 | 1,5      | 14034,1  | 9511,3    | 4708,6    | 8365,8      | 1,8                   |
| MT-ND2    | mitochondrially encoded NADH dehydrogenase 2                       | TM             | Expressed in all high |                         | 1,0      | 11515,4  | 11002,7   | 3994,9    | 7938,9      | 2,0                   |
| MT-CO2    | mitochondrially encoded cytochrome c oxidase II                    | TM             | Expressed in all high | Transporters            | 1,5      | 11069,0  | 7276,6    | 4439,5    | 6884,1      | 1,6                   |
| MT-CYB    | mitochondrially encoded cytochrome b                               | TM             | Expressed in all high |                         | 1,4      | 8772,8   | 6266,4    | 3143,1    | 6266,4      | 2,0                   |
| MT-ND4L   | mitochondrially encoded NADH dehydrogenase 4L                      | TM             | Expressed in all high | Enzymes                 | 1,3      | 7460,8   | 5703,4    | 2906,4    | 5703,4      | 2,0                   |
| MT-ND1    | mitochondrially encoded NADH dehydrogenase 1                       | TM             | Expressed in all high | Enzymes                 | 1,4      | 8035,4   | 5561,5    | 2767,3    | 4871,4      | 1,8                   |
| MT-ND6    | mitochondrially encoded NADH dehydrogenase 6                       | TM             | Expressed in all high | Enzymes                 | 1,7      | 8003,5   | 4756,7    | 2382,6    | 4544,7      | 1,9                   |
| MT-ND3    | mitochondrially encoded NADH dehydrogenase 3                       | TM             | Expressed in all high | Enzymes                 | 1,6      | 8588,5   | 5236,3    | 3088,8    | 4440,1      | 1,4                   |
| MT-ND5    | mitochondrially encoded NADH dehydrogenase 5                       | TM             | Expressed in all high | Enzymes                 | 1,7      | 7358,3   | 4389,9    | 2007,2    | 4389,9      | 2,2                   |
| B2M       | beta-2-microglobulin                                               | INTRA-SP       | Expressed in all high | Plasma proteins         | 1,0      | 5523,5   | 5438,9    | 3359,2    | 1941,4      | 0,6                   |
| ALDOB     | aldolase B, fructose-bisphosphate                                  | INTRA          | Group enriched        | Enzymes                 | 1,0      | 1935,4   | 1867,0    | 270,2     | 1867,0      | 6,9                   |
| EEF1A1    | eukaryotic translation elongation factor 1 alpha 1                 | INTRA          | Expressed in all high |                         | 1,1      | 1990,8   | 1834,1    | 1201,7    | 1722,5      | 1,4                   |
| TPT1      | tumor protein, translationally-controlled 1                        | INTRA          | Expressed in all high |                         | 1,2      | 2701,9   | 2301,8    | 1553,6    | 1539,0      | 1,0                   |
| FTL       | ferritin, light polypeptide                                        | INTRA          | Expressed in all high | Plasma proteins         | 1,1      | 1593,9   | 1488,8    | 860,8     | 1461,8      | 1,7                   |
| UMOD      | uromodulin                                                         | INTRA-SP-TM    | Tissue specific       |                         | 647,6    | 1420,8   | 2,2       | 53,0      | 1420,8      | 26,8                  |
| SPP1      | secreted phosphoprotein 1                                          | SP             | Group enriched        |                         | 1,1      | 1794,3   | 1669,6    | 206,4     | 1230,9      | 6,0                   |
| GATM      | glycine amidinotransferase (L-arginine:glycine amidinotransferase) | INTRA          | Mixed High            | Enzymes                 | 1,2      | 1127,9   | 974,2     | 151,2     | 974,2       | 6,4                   |
| ITM2B     | integral membrane protein 2B                                       | TM             | Expressed in all high |                         | 1,3      | 900,7    | 687,6     | 428,9     | 900,7       | 2,1                   |
| FXSD2     | FXSD domain containing ion transport regulator 2                   | TM             | Group enriched        | Transporters            | 1,5      | 851,4    | 559,9     | 76,6      | 851,4       | 11,1                  |
| ATP1B1    | ATPase, Na+/K+ transporting, beta 1 polypeptide                    | INTRA-TM       | Expressed in all low  | Transporters            | 2,4      | 840,5    | 349,7     | 162,2     | 840,5       | 5,2                   |
| LDHB      | lactate dehydrogenase B                                            | INTRA          | Expressed in all high | Plasma proteins,Enzymes | 1,4      | 1129,6   | 822,2     | 263,4     | 822,2       | 3,1                   |
| UBB       | ubiquitin B                                                        | INTRA          | Expressed in all high |                         | 1,0      | 899,4    | 893,5     | 626,3     | 815,4       | 1,3                   |
| GSTA1     | glutathione S-transferase alpha 1                                  | INTRA          | Mixed high            | Enzymes                 | 1,4      | 1135,2   | 810,1     | 184,6     | 810,1       | 4,4                   |
| RPL41     | ribosomal protein L41                                              | INTRA          | Expressed in all high | Ribosomal proteins      | 1,7      | 2617,5   | 1582,3    | 1114,8    | 783,3       | 0,7                   |
| PDZK1IP1  | PDZK1 interacting protein 1                                        | TM             | Mixed high            |                         | 4,0      | 751,5    | 187,9     | 59,1      | 751,5       | 12,7                  |
| MT1G      | metallothionein 1G                                                 | INTRA-SP       | Expressed in all low  |                         | 1,3      | 1001,5   | 744,3     | 163,8     | 744,3       | 4,5                   |
