# Supplementary material for: The Kidney Transcriptome and Proteome Defined by Transcriptomics and Antibody-Based Profiling
Source: PubMed Central journal article supplement (PMC4281243; doi:10.1371/journal.pone.0116125), 2014-12-31
Supplement: pone.0116125.s004.pdf [file pone.0116125.s004.pdf]

Table S2. The kidney enriched genes

| Gene name   | Description                            | Localization         | Cellular Compartment | Kidney mRNA | TS score | q-value   |
|-------------|----------------------------------------|----------------------|----------------------|-------------|----------|-----------|
| UMOD        | Uromodulin                             | Distal tubule        | Membrane             | 1421        | 647,6    | 2,80E-035 |
| SLC22A8     | Solute carrier family 22, member 8     | Proximal tubule      | Membrane             | 269         | 633,4    | 2,60E-032 |
| SLC12A1     | Solute carrier family 12, member 1     | Distal tubule        | Membrane             | 406         | 460,4    | 2,90E-027 |
| TMEM174     | Transmembrane protein 174              | Proximal tubule      | Membrane             | 97          | 443,8    | 2,90E-027 |
| MCCD1       | Mitochondrial coiled-coil domain 1     | Tubule               | Membrane             | 27          | 271,0    | 1,10E-026 |
| SLC34A1     | Solute carrier family 34, member 1     | Proximal tubule      | Membrane             | 176         | 219,8    | 3,00E-028 |
| AQP2        | Aquaporin 2 (collecting duct)          | Collecting duct      | Membrane             | 315         | 177,1    | 8,10E-022 |
| SLC22A12    | Solute carrier family 22, member 12    | Proximal tubule      | Membrane             | 108         | 162,0    | 4,10E-032 |
| SLC22A2     | Solute carrier family 22, member 2     | Tubule               | Membrane             | 97          | 154,6    | 1,10E-023 |
| SLC22A6     | Solute carrier family 22, member 6     | No IHC               | Membrane             | 198         | 144,5    | 7,50E-027 |
| KCNJ1       | Potassium inwardly-rectifying channel  | Distal tubule        | Membrane             | 132         | 140,3    | 3,10E-023 |
| SLC7A13     | Solute carrier family 7, membrane 13   | No IHC               | Membrane             | 19          | 118,7    | 2,10E-014 |
| NPHS2       | Nephrosis 2, idiopathic, (podocin)     | Glomeruli            | Membrane             | 68          | 116,0    | 2,10E-020 |
| SLC6A18     | Solute carrier family 6, member 18     | Proximal tubule      | Membrane             | 11          | 106,0    | 2,00E-015 |
| SLC36A2     | Solute carrier family 36, member 2     | Proximal tubule      | Membrane             | 64          | 97,0     | 1,50E-017 |
| SLC12A3     | Solute carrier family 12, member 3     | Tubule               | Membrane             | 129         | 84,3     | 4,20E-023 |
| SLC22A13    | Solute carrier family 22, member 13    | Proximal tubule      | Membrane             | 12          | 74,4     | 6,90E-015 |
| ATP6V1G3    | ATPase, H+ transporting, lysosomal     | Tubule               | Membrane             | 38          | 73,6     | 1,60E-021 |
| MIOX        | Myo-inositol oxygenase                 | Proximal tubule      | Cytoplasm            | 625         | 73,4     | 8,10E-022 |
| TMEM207     | Transmembrane protein 207              | Negative             | Membrane             | 10          | 59,1     | 1,10E-017 |
| LHX1        | LIM homeobox 1                         | Glomeruli and tubule | Nuclear              | 8           | 46,7     | 2,50E-018 |
| SLC5A10     | Solute carrier family 5, member 10     | Tubule               | Membrane             | 48          | 27,5     | 1,50E-009 |
| SLC22A24    | Solute carrier family 22, member 24    | Glomeruli and tubule | Membrane             | 3           | 25,9     | 1,10E-018 |
| CTXN3       | Cortixin 3                             | No IHC               | Membrane             | 44          | 23,0     | 2,50E-015 |
| SLC4A9      | Solute carrier family 4, member 9      | Collecting duct      | Membrane             | 11          | 18,8     | 8,50E-012 |
| CALB1       | Calbindin 1, 28kDa                     | Distal tubule        | Cytoplasm            | 230         | 18,7     | 3,90E-017 |
| SOST        | Sclerostin                             | Tubule               | Secreted             | 11          | 17,8     | 2,00E-015 |
| ATP6V0D2    | ATPase, H+ transporting, lysosomal     | Distal tubule        | Cytoplasm            | 41          | 17,8     | 3,80E-009 |
| AP000322.53 | No name                                | Tubule               | Nuclear              | 12          | 16,9     | 2,30E-006 |
| FXYD4       | FXYD domain ion transport regulator 4  | Interstitial         | Membrane             | 80          | 15,9     | 1,30E-006 |
| NOX4        | NADPH oxidase 4                        | Proximal tubule      | Membrane             | 114         | 15,7     | 6,60E-011 |
| NAT8        | N-acetyltransferase 8                  | Proximal tubule      | Membrane             | 528         | 13,4     | 2,80E-018 |
| TMEM52B     | Transmembrane protein 52B              | Proximal tubule      | Membrane             | 129         | 12,9     | 4,30E-012 |
| SLC6A13     | Solute carrier family 6, member 13     | Distal tubule        | Membrane             | 141         | 12,6     | 1,20E-011 |
| SLC47A2     | Solute carrier family 47, member 2     | Glomeruli and tubule | Membrane             | 48          | 12,4     | 2,90E-011 |
| C9orf66     | Chromosome 9 open reading frame 66     | Tubule               | Cytoplasm            | 18          | 12,3     | 4,00E-005 |
| AQP6        | Aquaporin 6, kidney specific           | Tubule               | Membrane             | 17          | 11,3     | 5,30E-007 |
| HMX2        | H6 family homeobox 2                   | Tubule               | Cytoplasm            | 2           | 10,1     | 1,00E-007 |
| TMEM72      | Transmembrane protein 72               | Distal tubule        | Membrane             | 51          | 9,7      | 5,50E-008 |
| C16orf11    | Chromosome 16 open reading frame 11    | No IHC               | Cytoplasm            | 4           | 9,5      | 9,40E-008 |
| PAX2        | Paired box 2                           | Proximal tubule      | Nuclear              | 36          | 9,2      | 1,60E-015 |
| TMEM27      | TransMembraneprotein 27                | Tubule               | Membrane             | 219         | 9,0      | 5,50E-012 |
| UPP2        | Uridine phosphorylase 2                | Glomeruli and tubule | Cytoplasm            | 28          | 8,8      | 2,90E-010 |
| PVALB       | Parvalbumin                            | Distal tubule        | Cytoplasm            | 40          | 8,4      | 1,30E-006 |
| PTH1R       | Parathyroid hormone 1 receptor         | Distal tubule        | Membrane             | 183         | 8,4      | 6,40E-006 |
| OR2T10      | Olfactory receptor 2, member 10        | Negative             | Membrane             | 4           | 7,9      | 0,00094   |
| CDH16       | Cadherin 16, KSP-cadherin              | Distal tubule        | Membrane             | 226         | 7,5      | 2,60E-011 |
| SLC5A2      | Solute carrier family 5, member 2      | Proximal tubule      | Membrane             | 50          | 7,1      | 4,40E-008 |
| FMO1        | Flavin containing monooxygenase 1      | Proximal tubule      | Membrane             | 185         | 7,0      | 1,70E-006 |
| CRYAA       | Crystallin, alpha A                    | Proximal tubule      | Cytoplasm            | 103         | 6,5      | 1,80E-012 |
| CYS1        | Cystin 1                               | No IHC               | Cytoplasm            | 99          | 6,5      | 4,00E-005 |
| SIM1        | Single-minded homolog 1 (Drosophila)   | Distal tubule        | Cytoplasm            | 11          | 6,4      | 3,80E-010 |
| SLC13A3     | Solute carrier family 13, member 3     | Glomeruli and tubule | Membrane             | 305         | 6,3      | 7,40E-010 |
| EMX1        | Empty spiracles homeobox 1             | Distal tubule        | Cytoplasm            | 28          | 6,2      | 3,50E-007 |
| CLCNKA      | Chloride channel, voltage-sensitive Ka | Distal tubule        | Membrane             | 62          | 6,0      | 0,0099    |
| RAB11FIP3   | RAB11 family interacting protein 3     | Proximal tubule      | Cytoplasm            | 143         | 5,9      | 0,9300    |
| TINAG       | Tubulointerstitial nephritis antigen   | Tubule               | Cytoplasm            | 78          | 5,8      | 4,46E-008 |
| GALNT14     | Acetylgalactosaminyltransferase 14     | Proximal tubule      | Membrane             | 56          | 5,7      | 0,0016    |
| TRPV5       | Transient receptor, member 5           | Glomeruli and tubule | Membrane             | 1           | 5,6      | 0,0049    |
| SLC16A12    | Solute carrier family 16, member 12    | Proximal tubule      | Membrane             | 62          | 5,4      | 1,82E-005 |
| C10orf126   | Chromosome 10 frame 126                | Proximal tubule      | Nuclear              | 2           | 5,4      | 1,51E-005 |
| A2LD1       | AIG2-like domain 1                     | No IHC               | Cytoplasm            | 63          | 5,3      | 0,0026    |
| RNF152      | Ring finger protein 152                | Proximal tubule      | Membrane             | 53          | 5,1      | 0,0160    |
| CLEC18B     | C-type lectin family 18, member B      | Tubule               | Secreted             | 39          | 5,1      | 0,00019   |
