# Supplementary material for: The Kidney Transcriptome and Proteome Defined by Transcriptomics and Antibody-Based Profiling
Source: PubMed Central journal article supplement (PMC4281243; doi:10.1371/journal.pone.0116125), 2014-12-31
Supplement: pone.0116125.s005.pdf [file pone.0116125.s005.pdf]

Table S3. The 39 kidney/liver shared proteins

| Gene_name | Description                                                         | Proteinclasses             | group tissues | Group-specific |             |            |
|-----------|---------------------------------------------------------------------|----------------------------|---------------|----------------|-------------|------------|
|           |                                                                     |                            |               | score          | Kidney fpkm | Liver fpkm |
| CLCN5     | chloride channel, voltage-sensitive 5                               |                            | kidney,liver  | 5.1            | 41.1        | 8.7        |
| SLC17A3   | solute carrier family 17 (sodium phosphate), member 3               | Transporters               | kidney,liver  | 125.6          | 101.7       | 23.1       |
| SLC17A1   | solute carrier family 17 (sodium phosphate), member 1               | Transporters               | kidney,liver  | 35.3           | 97.4        | 24.7       |
| UGT1A9    | UDP glucuronosyltransferase 1 family, polypeptide A9                | Enzymes                    | kidney,liver  | 191.3          | 252.9       | 65.0       |
| PRODH2    | proline dehydrogenase (oxidase) 2                                   | Enzymes                    | kidney,liver  | 72.5           | 201.4       | 67.9       |
| AGXT2     | alanine--glyoxylate aminotransferase 2                              | Enzymes                    | kidney,liver  | 21.3           | 114.0       | 52.1       |
| ACSM2A    | acyl-CoA synthetase medium-chain family member 2A                   | Enzymes                    | kidney,liver  | 386.2          | 281.6       | 193.4      |
| BHMT      | betaine--homocysteine S-methyltransferase                           | Enzymes                    | kidney,liver  | 127.3          | 559.7       | 401.4      |
| ACOT6     | acyl-CoA thioesterase 6                                             |                            | kidney,liver  | 5.6            | 1.6         | 1.2        |
| BHMT2     | betaine--homocysteine S-methyltransferase 2                         | Enzymes                    | kidney,liver  | 7.6            | 331.9       | 255.0      |
| ACMSD     | aminocarboxymuconate semialdehyde decarboxylase                     | Enzymes                    | kidney,liver  | 11.1           | 85.9        | 66.8       |
| AFP       | alpha-fetoprotein                                                   | Plasma proteins            | kidney,liver  | 55.9           | 16.1        | 12.9       |
| UGT2B7    | UDP glucuronosyltransferase 2 family, polypeptide B7                | Enzymes                    | kidney,liver  | 8.5            | 597.5       | 485.3      |
| HAO2      | hydroxyacid oxidase 2 (long chain)                                  | Enzymes                    | kidney,liver  | 447.9          | 198.3       | 172.6      |
| DMGDH     | dimethylglycine dehydrogenase                                       | Enzymes                    | kidney,liver  | 10.6           | 130.0       | 116.0      |
| ACSM2B    | acyl-CoA synthetase medium-chain family member 2B                   | Enzymes                    | kidney,liver  | 264.1          | 319.5       | 293.3      |
| DAO       | D-amino-acid oxidase                                                | Enzymes                    | kidney,liver  | 47.0           | 58.8        | 56.9       |
| ASS1      | argininosuccinate synthase 1                                        | Enzymes                    | kidney,liver  | 5.1            | 730.4       | 793.9      |
| UGT2A1    | UDP glucuronosyltransferase 2 family, polypeptide A1, complex locus | Enzymes                    | kidney,liver  | 19.5           | 14.9        | 16.9       |
| SLC27A2   | solute carrier family 27 (fatty acid transporter), member 2         | Transporters,Enzymes       | kidney,liver  | 5.5            | 93.3        | 115.9      |
| ASPDH     | aspartate dehydrogenase domain containing                           | Enzymes                    | kidney,liver  | 6.7            | 30.2        | 37.9       |
| DPYS      | dihydropyrimidinase                                                 | Enzymes                    | kidney,liver  | 15.3           | 177.5       | 231.4      |
| RIPPLY1   | rippy1 homolog (zebrafish)                                          |                            | kidney,liver  | 9.1            | 2.5         | 3.5        |
| DNMT3L    | DNA (cytosine-5-)-methyltransferase 3-like                          |                            | kidney,liver  | 17.5           | 4.1         | 5.9        |
| EHHADH    | enoyl-CoA, hydratase/3-hydroxyacyl CoA dehydrogenase                | Enzymes                    | kidney,liver  | 7.5            | 116.5       | 167.4      |
| GLYATL1   | glycine-N-acyltransferase-like 1                                    | Enzymes                    | kidney,liver  | 12.8           | 239.9       | 364.1      |
| PROZ      | protein Z, vitamin K-dependent plasma glycoprotein                  | Peptidases,Plasma proteins | kidney,liver  | 28.6           | 15.4        | 25.3       |
| CLDN14    | claudin 14                                                          |                            | kidney,liver  | 13.3           | 5.3         | 9.0        |
| ALDH8A1   | aldehyde dehydrogenase 8 family, member A1                          |                            | kidney,liver  | 120.5          | 70.7        | 123.5      |
| FTCD      | formiminotransferase cyclodeaminase                                 | Enzymes                    | kidney,liver  | 9.2            | 148.1       | 260.3      |
| APOM      | apolipoprotein M                                                    |                            | kidney,liver  | 15.3           | 109.8       | 218.9      |
| HRSP12    | heat-responsive protein 12                                          |                            | kidney,liver  | 8.9            | 297.7       | 596.5      |
| PIPOX     | pipecolic acid oxidase                                              | Enzymes                    | kidney,liver  | 13.9           | 105.1       | 213.5      |
| CYP4A11   | cytochrome P450, family 4, subfamily A, polypeptide 11              | Enzymes                    | kidney,liver  | 49.4           | 197.2       | 460.7      |
| HPD       | 4-hydroxyphenylpyruvate dioxygenase                                 | Enzymes                    | kidney,liver  | 109.7          | 306.1       | 878.7      |
| SLC22A7   | solute carrier family 22 (organic anion transporter), member 7      | Transporters               | kidney,liver  | 65.0           | 47.4        | 141.6      |
| UPB1      | ureidopropionase, beta                                              | Enzymes                    | kidney,liver  | 22.7           | 39.4        | 120.6      |
| CYP4A22   | cytochrome P450, family 4, subfamily A, polypeptide 22              | Enzymes                    | kidney,liver  | 494.6          | 33.2        | 120.2      |
| KNG1      | kininogen 1                                                         | Plasma proteins            | kidney,liver  | 344.9          | 271.2       | 1035.8     |
