# Supplementary material for: The Kidney Transcriptome and Proteome Defined by Transcriptomics and Antibody-Based Profiling
Source: PubMed Central journal article supplement (PMC4281243; doi:10.1371/journal.pone.0116125), 2014-12-31
Supplement: pone.0116125.s006.pdf [file pone.0116125.s006.pdf]

**Table S4. Nephron segment-specific localized genes with kidney specificity.**

| Gene name                                | Description                                     | Category RNA        | FPKM  | Public database (mRNA level) |                 | Public database (protein level) |                 | Public database (Urine proteome) | Farrah (1) | Literature  |
|------------------------------------------|-------------------------------------------------|---------------------|-------|------------------------------|-----------------|---------------------------------|-----------------|----------------------------------|------------|-------------|
|                                          |                                                 |                     |       | Database                     | Nephron segment | Database                        | Nephron segment |                                  |            |             |
| <b>a. Glomeruli elevated genes</b>       |                                                 |                     |       |                              |                 |                                 |                 |                                  |            |             |
| PODXL                                    | podocalyxin-like                                | Enhanced            | 126,7 | KUPKB                        | g               | KUPKB                           | g               | KUPKB, UEPD                      | k/u/pl     | k, g (2)    |
| TSPAN33                                  | tetraspanin 33                                  | Enhanced            | 98,3  | KUPKB                        | p               |                                 |                 |                                  |            |             |
| FGF1                                     | fibroblast growth factor 1 (acidic)             | Enhanced            | 68,5  | KUPKB                        | g,p             | KUPKB                           | g               |                                  | k          | k, g, d (3) |
| NPHS2                                    | nephrosis 2, idiopathic, (podocin)              | Highly enriched     | 68,2  | KUPKB                        | g               | KUPKB                           | g               | UEPD                             | k/u        | k, g (4)    |
| SLC5A3                                   | solute carrier family 5, member 3               | Enhanced            | 28,2  | KUPKB                        | k (n.s)         |                                 |                 |                                  |            | k, g (5)    |
| PTH2R                                    | parathyroid hormone 2 receptor                  | Enhanced            | 23,3  |                              |                 |                                 |                 |                                  |            | k, g (6)    |
| GPR110                                   | G protein-coupled receptor 110                  | Enhanced            | 22,8  |                              |                 |                                 |                 |                                  |            | k, (7)      |
| TRIM6                                    | tripartite motif containing 6                   | Enhanced            | 20,8  | KUPKB                        | p               |                                 |                 |                                  |            |             |
| NPHS1                                    | nephrosis 1, congenital, Finnish type (nephrin) | Group enriched      | 20,6  | KUPKB                        | g               | KUPKB, HKUPP                    | g               | KUPKB, UEPD                      | k          | k, g (8)    |
| PTPRO                                    | protein tyrosine phosphatase, receptor type, O  | Enhanced            | 19,3  | KUPKB                        | g               | KUPKB, HKUPP                    | g               | KUPKB, UEPD                      | k/u        | k, g (9)    |
| SLC25A48                                 | solute carrier family 25, member 48             | Enhanced            | 12,8  | KUPKB                        | p,d,c           |                                 |                 |                                  |            |             |
| CRB2                                     | crumbs homolog 2 (Drosophila)                   | Enhanced            | 5,1   | KUPKB                        | p               | KUPKB, HKUPP                    | g               | KUPKB, UEPD                      | k/u/pl     | k, (10)     |
| <b>b. Proximal tubuli elevated genes</b> |                                                 |                     |       |                              |                 |                                 |                 |                                  |            |             |
| ALDOB                                    | aldolase B, fructose-bisphosphate               | Group enriched      | 1867  | KUPKB                        | p,d,c           | KUPKB, HKUPP                    | g               | KUPKB                            | k/u/pl     | k, (11)     |
| GATM                                     | glycine amidinotransferase                      | Group enriched      | 974,2 | KUPKB                        | p,d,c           | KUPKB, HKUPP                    | g               | KUPKB                            | k/u/pl     | k, p (12)   |
| PDZK1IP1                                 | PDZK1 interacting protein 1                     | Enhanced            | 751,5 | KUPKB                        | g,p,d,c         | KUPKB, HKUPP                    | g               | KUPKB, UEPD                      | k/u        | k, p (13)   |
| ASS1                                     | argininosuccinate synthase 1                    | Group enriched      | 730,4 | KUPKB                        | g,p,d,c         | KUPKB, HKUPP                    | g               | KUPKB, UEPD                      | k/u/pl     | k, p (14)   |
| MIOX                                     | myo-inositol oxygenase                          | Highly enriched     | 624,9 | KUPKB                        | p,d,c           |                                 |                 |                                  | k/u        | k, p (15)   |
| PAH                                      | phenylalanine hydroxylase                       | Enhanced            | 570,5 | KUPKB                        | g               | KUPKB                           | k               |                                  |            | k, p (16)   |
| BHMT                                     | betaine--homocysteine S-methyltransferase       | Group enriched      | 559,7 | KUPKB                        | g,p,d,c         | KUPKB, HKUPP                    | g               | KUPKB                            | k/u/pl     | k, p (17)   |
| NAT8                                     | N-acetyltransferase 8 (GCN5-related, putative)  | Moderately enriched | 527,5 | KUPKB                        | p,d,c           |                                 |                 |                                  |            | k, (18)     |
| PCK1                                     | phosphoenolpyruvate carboxykinase 1 (soluble)   | Enhanced            | 493,6 | KUPKB                        | p,d,c           | KUPKB, HKUPP                    | g               | KUPKB, UEPD                      | k/u        | k, p (19)   |
| C19orf77                                 | chromosome 19 open reading frame 77             | Enhanced            | 442,6 | KUPKB                        | p               |                                 |                 | KUPKB, UEPD                      | k/u        |             |
| GSTA2                                    | glutathione S-transferase alpha 2               | Enhanced            | 393,7 | KUPKB                        | k (n.s)         | KUPKB, HKUPP                    | g               | KUPKB                            | k/u/pl     | k, p (20)   |
| PDZK1                                    | PDZ domain containing 1                         | Enhanced            | 390,4 | KUPKB                        | p,d,c           | KUPKB, HKUPP                    | g               | KUPKB, UEPD                      | k/u/pl     | k, p (21)   |
| ACY1                                     | aminoacylase 1                                  | Group enriched      | 346,8 | KUPKB                        | p,d,c           | KUPKB, HKUPP                    | g               | KUPKB, UEPD                      | k/u/pl     | k, p (22)   |
| BHMT2                                    | betaine--homocysteine S-methyltransferase 2     | Group enriched      | 331,9 |                              |                 | KUPKB                           | k               | KUPKB, UEPD                      | k/u/pl     | k, (23)     |
| ACSM2B                                   | acyl-CoA synthetase medium-chain member 2B      | Group enriched      | 319,5 |                              |                 | KUPKB                           | g               |                                  | k/u        |             |
| PEPD                                     | peptidase D                                     | Enhanced            | 314,8 | KUPKB                        | p,d,c           | KUPKB, HKUPP                    | g               | KUPKB, UEPD                      | k/u/pl     |             |
| SLC3A1                                   | solute carrier family 3, member 1               | Enhanced            | 314,1 | KUPKB                        | p,d,c           |                                 |                 | UEPD                             | u          | k, p (24)   |
| HPD                                      | 4-hydroxyphenylpyruvate dioxygenase             | Group enriched      | 306,1 | KUPKB                        | p               |                                 |                 | KUPKB, UEPD                      | k/u/pl     | k, (25)     |
| SLC13A3                                  | solute carrier family 13, member 3              | Moderately enriched | 304,5 | KUPKB                        | p, d            | KUPKB, HKUPP                    | g               | UEPD                             |            | k, p (26)   |
| HRSP12                                   | heat-responsive protein 12                      | Group enriched      | 297,7 | KUPKB                        | g,p             | KUPKB, HKUPP                    | g               | KUPKB, UEPD                      | k/u/pl     | k, (27)     |
| ACSM2A                                   | acyl-CoA synthetase medium-chain member 2A      | Group enriched      | 281,6 |                              |                 | KUPKB, HKUPP                    | g               |                                  | k/u        |             |

| Proximal tubuli elevated genes (continued) |                                               |                     |       |       |         |              |   |             |        |           |
|--------------------------------------------|-----------------------------------------------|---------------------|-------|-------|---------|--------------|---|-------------|--------|-----------|
| KNR1                                       | kininogen 1                                   | Group enriched      | 271,2 | KUPKB | p, d    | KUPKB, HKUPP | g | KUPKB, UEPD | k/u/pl | k, (28)   |
| SLC22A8                                    | solute carrier family 22, member 8            | Highly enriched     | 268,6 | KUPKB | p, d    |              |   | UEPD        | k      | k, p (29) |
| GLYAT                                      | glycine-N-acyltransferase                     | Group enriched      | 268   | KUPKB | p       | KUPKB, HKUPP | g |             | k      | k, (30)   |
| C11orf54                                   | chromosome 11 open reading frame 54           | Enhanced            | 265,4 | KUPKB | p,d,c   | KUPKB, HKUPP | g | UEPD        | k/u/pl | k, (31)   |
| BBOX1                                      | butyrobetaine2-oxoglutarate dioxygenase 1     | Enhanced            | 255,6 | KUPKB | p,d,c   |              |   | UEPD        | k/u    | k, (32)   |
| DPEP1                                      | dipeptidase 1 (renal)                         | Enhanced            | 249,4 | KUPKB | p,d,c   | KUPKB, HKUPP | g | KUPKB, UEPD | k/u/pl | k, p (33) |
| CMBL                                       | carboxymethylenebutenolidase                  | Enhanced            | 246,8 | KUPKB | p,d,c   | KUPKB, HKUPP | g | UEPD        | k/u/pl | k, (34)   |
| GLYATL1                                    | glycine-N-acyltransferase-like 1              | Group enriched      | 239,9 |       |         | KUPKB, HKUPP | g |             | k      | k, (35)   |
| DDC                                        | dopa decarboxylase                            | Enhanced            | 223,9 | KUPKB | p       | KUPKB, HKUPP | g | KUPKB, UEPD | k/u/pl | k, p (36) |
| KHK                                        | ketoheksokinase (fructokinase)                | Group enriched      | 208   | KUPKB | p, d    | KUPKB, HKUPP | g | UEPD        | k/u/pl | k, p (37) |
| SLC7A7                                     | solute carrier family 7, member 7             | Enhanced            | 201,7 | KUPKB | k (n.s) |              |   |             |        | k, (38)   |
| FMO1                                       | flavin containing monooxygenase 1             | Moderately enriched | 184,8 | KUPKB | p       |              |   |             | k      | k, p (39) |
| SHMT1                                      | serine hydroxymethyltransferase 1 (soluble)   | Enhanced            | 184,7 | KUPKB | p,d,c   | KUPKB        | k | KUPKB, UEPD | k/u/pl | k, p (40) |
| DHRS4                                      | dehydrogenase/reductase member 4              | Enhanced            | 184   | KUPKB | p,d,c   | KUPKB, HKUPP | g |             | k      |           |
| DPYS                                       | dihydropyrimidinase                           | Group enriched      | 177,5 | KUPKB | p, d    | HKUPP        | g | KUPKB, UEPD | k/u    | k, (41)   |
| PBLD                                       | phenazine biosynthesis-like protein domain    | Enhanced            | 177,1 | KUPKB | g,p,d,c | KUPKB, HKUPP | g | KUPKB, UEPD | k/u/pl |           |
| SLC34A1                                    | solute carrier family 34, member 1            | Highly enriched     | 175,6 | KUPKB | g,p, d  |              |   |             | u      | k, p (42) |
| PCK2                                       | Phosphoenolpyruvate carboxykinase 2           | Group enriched      | 169   | KUPKB | p,d,c   | KUPKB, HKUPP | g |             | k/u/pl | k, (43)   |
| FAM151A                                    | family with sequence similarity 151, member A | Group enriched      | 168,2 |       |         |              |   | KUPKB       | k/u    |           |
| SLC7A8                                     | solute carrier family 7, member 8             | Enhanced            | 158,7 |       |         |              |   |             | u      | k, (44)   |
| FTCD                                       | formiminotransferase cyclodeaminase           | Group enriched      | 148,1 | KUPKB | p,c     | KUPKB, HKUPP | g | UEPD        | k/u    | k, (45)   |
| XPNPEP2                                    | X-prolyl aminopeptidase (aminopeptidase P) 2, | Group enriched      | 134,3 | KUPKB |         |              |   | KUPKB, UEPD | k/u/pl |           |
| AGMAT                                      | agmatine ureohydrolase (agmatinase)           | Enhanced            | 130,2 |       |         | KUPKB, HKUPP | g |             | k/pl   | k, (46)   |
| DMGDH                                      | dimethylglycine dehydrogenase                 | Group enriched      | 130   |       |         | KUPKB, HKUPP | g |             | k/pl   | k, p (47) |
| AK4                                        | adenylate kinase 4                            | Enhanced            | 127,9 | KUPKB | k (n.s) | KUPKB, HKUPP | g |             | k/u/pl | k, p (48) |
| GGT1                                       | gamma-glutamyltransferase 1                   | Enhanced            | 126,9 | KUPKB | p,d,c   | KUPKB, HKUPP | g | KUPKB       | k/u/pl | k, p (49) |
| KL                                         | klotho                                        | Group enriched      | 120,6 | KUPKB | p       |              |   | UEPD        | u      | k, p (50) |
| CUBN                                       | cubilin (intrinsic factor-cobalamin receptor) | Group enriched      | 120,6 | KUPKB | k (n.s) | KUPKB, HKUPP | g | KUPKB, UEPD | k/u/pl | k, p (51) |
| EHHADH                                     | enoyl-CoA,hydrataseCoA dehydrogenase          | Group enriched      | 116,5 | KUPKB | g,p, d  | KUPKB, HKUPP | g |             | k      | k, p (52) |
| AGXT2                                      | alanine--glyoxylate aminotransferase 2        | Group enriched      | 114   |       |         | KUPKB        | k |             |        | k, (53)   |
| NOX4                                       | NADPH oxidase 4                               | Moderately enriched | 113,8 |       |         | KUPKB, HKUPP | g |             |        | k, d (54) |
| APOM                                       | apolipoprotein M                              | Group enriched      | 109,8 | KUPKB | p, c    |              |   |             | k/u/pl | k, p (55) |
| SLC16A4                                    | solute carrier family 16, member 4            | Enhanced            | 109,4 | KUPKB | p,d,c   |              |   |             |        | k, p (56) |
| SLC22A12                                   | solute carrier family 22, member 12           | Highly enriched     | 108,4 |       |         |              |   | UEPD        | k/u    | k, p (57) |
| QPRT                                       | quinolinate phosphoribosyltransferase         | Enhanced            | 108,2 | KUPKB | g,p,d,c |              |   | KUPKB       | k/u/pl | k, (58)   |
| SLC16A9                                    | solute carrier family 16, member 9            | Enhanced            | 106,4 |       |         |              |   |             |        | k, (59)   |
| SLC4A4                                     | solute carrier family 4, , member 4           | Enhanced            | 104   | KUPKB | p,d,c   |              |   | UEPD        |        | k, p (60) |
| SORD                                       | sorbitol dehydrogenase                        | Group enriched      | 103,8 | KUPKB | p       |              |   | KUPKB, UEPD | k/u/pl | k, (61)   |
| CRYAA                                      | crystallin, alpha A                           | Moderately enriched | 102,7 | KUPKB | k (n.s) |              |   | KUPKB       | k      |           |
| SLC17A3                                    | solute carrier family 17, member 3            | Group enriched      | 101,7 | KUPKB | p,d,c   |              |   |             |        | k, p (62) |
| TMEM174                                    | transmembrane protein 174                     | Highly enriched     | 97,2  |       |         |              |   |             |        | k, (63)   |
| SLC6A19                                    | solute carrier family 6, member 19            | Group enriched      | 94,9  |       |         |              |   | KUPKB, UEPD | k/u    | k, p (64) |
| SLC27A2                                    | solute carrier family 27, member 2            | Group enriched      | 93,3  | KUPKB | p       | KUPKB        | k | UEPD        | k/u    | k, (65)   |
| ACMSD                                      | Aminocarboxymuconate decarboxylase            | Group enriched      | 85,9  | KUPKB | p       |              |   |             |        | k, (66)   |
| BPHL                                       | biphenyl hydrolase-like (serine hydrolase)    | Enhanced            | 79,9  | KUPKB | k (n.s) | KUPKB, HKUPP | g |             | k      | k, (67)   |

| Proximal tubuli elevated genes (continued) |                                              |                     |      |       |         |              |   |             |        |             |
|--------------------------------------------|----------------------------------------------|---------------------|------|-------|---------|--------------|---|-------------|--------|-------------|
| LRP2                                       | low density lipoprotein receptor protein 2   | Group enriched      | 74,4 | KUPKB | k (n.s) | KUPKB, HKUPP | g | KUPKB, UEPD | k/u    | k, p (68)   |
| SLC13A1                                    | solute carrier family 13, member 1           | Enhanced            | 72,8 | KUPKB | g,p,d,c |              |   |             |        | k, p (69)   |
| ALDH8A1                                    | aldehyde dehydrogenase 8 family, member A1   | Group enriched      | 70,7 |       |         | KUPKB        | k | KUPKB       |        | k, (70)     |
| SLC36A2                                    | solute carrier family 36, member 2           | Highly enriched     | 63,9 |       |         |              |   | KUPKB, UEPD | k/u    | k, p (71)   |
| SLC16A12                                   | solute carrier family 16, member 12          | Moderately enriched | 61,7 | KUPKB | p       |              |   |             |        | k, p (72)   |
| DAO                                        | D-amino-acid oxidase                         | Group enriched      | 58,8 |       |         | KUPKB, HKUPP | g |             | k      | k, p (73)   |
| RGN                                        | regucalcin (senescence marker protein-30)    | Group enriched      | 56,5 | KUPKB | k (n.s) |              |   |             | k/u    | k, p (74)   |
| SLC7A9                                     | solute carrier family 7, member 9            | Group enriched      | 52,2 |       |         |              |   |             |        | k, p (75)   |
| SFXN2                                      | sideroflexin 2                               | Enhanced            | 52   |       |         |              |   |             | k      |             |
| SLC5A2                                     | solute carrier family 5, member 2            | Moderately enriched | 49,5 | KUPKB | k (n.s) |              |   | UEPD        | k/u    | k, p (76)   |
| SLC5A10                                    | solute carrier family 5, member 10           | Moderately enriched | 48   |       |         |              |   | UEPD        | k/u    | k, (77)     |
| ACY3                                       | aspartoacylase (aminocyclase) 3              | Enhanced            | 47,7 |       |         |              |   | KUPKB, UEPD | k/u    | k, (78)     |
| SLC22A7                                    | solute carrier family 22, member 7           | Group enriched      | 47,4 | KUPKB | p, d    |              |   |             |        | k, p (79)   |
| CHDH                                       | choline dehydrogenase                        | Enhanced            | 47,2 |       |         | KUPKB        | k |             | k      | k, p (80)   |
| SLC22A11                                   | solute carrier family 22, member 11          | Group enriched      | 45,1 |       |         |              |   | UEPD        | k/u    | k, p (81)   |
| SLC2A9                                     | solute carrier family 2, member 9            | Enhanced            | 44,8 |       |         |              |   |             |        | k, p (82)   |
| CYP4F2                                     | cytochrome P450 superfamily                  | Group enriched      | 44,6 |       |         |              |   |             | k      | k, p (83)   |
| SLC23A1                                    | solute carrier family 23, member 1           | Enhanced            | 44,3 |       |         |              |   | UEPD        | k/u    | k, p (84)   |
| IL17RB                                     | interleukin 17 receptor B                    | Enhanced            | 40,8 | KUPKB | g,p,d,c |              |   |             |        | k, (85)     |
| SLC13A2                                    | solute carrier family 13, member 2           | Group enriched      | 40,1 | KUPKB | p       |              |   | UEPD        | u      | k, p (86)   |
| C7orf10                                    | chromosome 7 open reading frame 10           | Enhanced            | 38,8 | KUPKB | p       |              |   |             |        |             |
| MAPT                                       | microtubule-associated protein tau           | Group enriched      | 38,4 |       |         | KUPKB, HKUPP | g |             | k      |             |
| PAQR5                                      | progesterin and adipoQ receptor family V     | Enhanced            | 38   |       |         |              |   |             |        |             |
| UGT3A1                                     | UDP glycosyltransferase 3, polypeptide A1    | Enhanced            | 36,7 |       |         |              |   |             |        | k, (87)     |
| PAX2                                       | paired box 2                                 | Moderately enriched | 36   |       |         |              |   |             |        | k, p (88)   |
| ASPA                                       | aspartoacylase                               | Enhanced            | 34,4 | KUPKB | k (n.s) | KUPKB, HKUPP | g |             | k/u    | k, (89)     |
| SLC28A1                                    | solute carrier family 28, member 1           | Group enriched      | 34,3 |       |         |              |   |             | u      | k, g+p (90) |
| PKLR                                       | pyruvate kinase, liver and RBC               | Enhanced            | 30,5 |       |         | KUPKB, HKUPP | g | UEPD        | k/u/pl | k, p (91)   |
| MYOM3                                      | myomesin family, member 3                    | Group enriched      | 30,3 |       |         |              |   |             | pl     |             |
| ASPDH                                      | aspartate dehydrogenase domain containing    | Group enriched      | 30,2 |       |         |              |   |             | k/u/pl | k, (92)     |
| KMO                                        | kynurenine 3-monooxygenase                   | Enhanced            | 29   | KUPKB | p       |              |   |             | k      | k, (93)     |
| REN                                        | renin                                        | Group enriched      | 25,3 |       |         |              |   |             |        | k, g+p (94) |
| ENPP6                                      | ectonucleotide pyrophosphatase/PDE 6         | Enhanced            | 24,5 | KUPKB | p       |              |   | UEPD        | u/pl   | k, (95)     |
| SLC6A12                                    | solute carrier family 6, member 12           | Group enriched      | 24   | KUPKB | p       |              |   |             |        | k, c (96)   |
| PALM3                                      | paralemmin 3                                 | Enhanced            | 23,7 |       |         |              |   |             |        | k, p+d (97) |
| CDH6                                       | cadherin 6, type 2, K-cadherin               | Enhanced            | 19,5 | KUPKB | p       |              |   | KUPKB       | u/pl   | k, (98)     |
| SLC34A3                                    | solute carrier family 34, member 3           | Group enriched      | 18,1 | KUPKB | p,d,c   |              |   |             |        | k, p (99)   |
| ABCC2                                      | ATP-binding cassette, sub-family C, member 2 | Group enriched      | 16   | KUPKB | k (n.s) |              |   |             |        | k, p (100)  |
| SLC10A2                                    | solute carrier family 10, member 2           | Group enriched      | 12,3 |       |         |              |   |             |        | k, p (101)  |
| SLC22A13                                   | solute carrier family 22, member 13          | Highly enriched     | 11,7 |       |         |              |   | UEPD        |        | k, p (102)  |
| LYG1                                       | lysozyme G-like 1                            | Group enriched      | 10,6 | KUPKB | p       |              |   |             |        |             |
| SLC6A18                                    | solute carrier family 6, member 18           | Highly enriched     | 10,6 |       |         |              |   |             |        | k, p (103)  |
| MNS1                                       | meiosis-specific nuclear structural 1        | Group enriched      | 9,8  |       |         |              |   |             |        | k, (104)    |
| RP11-407N17.3                              | Cutaneous T-cell lymphoma-related antigen 5  | Enhanced            | 9,6  |       |         |              |   |             |        |             |
| RNF183                                     | ring finger protein 183                      | Enhanced            | 8,3  |       |         |              |   |             |        |             |

| <b>Proximal tubuli elevated genes (continued)</b>                    |                                                    |                     |        |       |         |              |   |             |        |              |
|----------------------------------------------------------------------|----------------------------------------------------|---------------------|--------|-------|---------|--------------|---|-------------|--------|--------------|
| ABCA4                                                                | ATP-binding cassette, sub-family A, member 4       | Enhanced            | 7,4    |       |         |              |   |             |        |              |
| ARSF                                                                 | arylsulfatase F                                    | Enhanced            | 5,9    |       |         |              |   | KUPKB, UEPD | u      |              |
| SLC5A11                                                              | solute carrier family 5, member 11                 | Group enriched      | 5,8    |       |         |              |   |             |        | k, p (105)   |
| FAM131C                                                              | family with sequence similarity 131, member C      | Enhanced            | 3,3    | KUPKB | p       |              |   |             |        |              |
| PNMA6A                                                               | paraneoplastic Ma antigen family member 6A         | Enhanced            | 3,2    | KUPKB | p       |              |   |             |        |              |
| C9orf135                                                             | chromosome 9 open reading frame 135                | Group enriched      | 3,1    |       |         |              |   |             |        |              |
| RIPPLY1                                                              | rippy1 homolog (zebrafish)                         | Group enriched      | 2,5    |       |         |              |   |             |        |              |
| CALCR                                                                | calcitonin receptor                                | Enhanced            | 1,6    |       |         |              |   |             |        | k, (106)     |
| INSRR                                                                | insulin receptor-related receptor                  | Enhanced            | 1,5    |       |         |              |   |             |        | k, p+d (107) |
| <b>c. distal tubuli elevated genes</b>                               |                                                    |                     |        |       |         |              |   |             |        |              |
| UMOD                                                                 | uromodulin                                         | Highly enriched     | 1420,8 | KUPKB | g,p,d,c | KUPKB, HKUPP | g | KUPKB, UEPD | k/u/pl | k, d (108)   |
| SLC12A1                                                              | solute carrier family 12, member 1                 | Highly enriched     | 406,1  | KUPKB | p,d,c   |              |   | KUPKB, UEPD | k/u    | k, d (109)   |
| CALB1                                                                | calbindin 1, 28kDa                                 | Moderately enriched | 229,6  | KUPKB | g,p,d,c | KUPKB, HKUPP | g | KUPKB, UEPD | k/u    | k, d (110)   |
| KCNJ1                                                                | potassium channel, subfamily J, member 1           | Highly enriched     | 132    | KUPKB | k (n.s) |              |   |             |        | k, d (111)   |
| SLC12A3                                                              | solute carrier family 12, member 3                 | Highly enriched     | 129,3  | KUPKB | p,d,c   |              |   | KUPKB, UEPD | k/u    | k, d (112)   |
| CLDN8                                                                | claudin 8                                          | Enhanced            | 56,9   | KUPKB | p,d,c   |              |   |             |        | k, d (113)   |
| CASR                                                                 | calcium-sensing receptor                           | Enhanced            | 21,1   | KUPKB | k (n.s) |              |   |             |        | k, d (114)   |
| GLTPD2                                                               | glycolipid transfer protein domain containing 2    | Enhanced            | 12,5   |       |         |              |   |             | pl     | k, (115)     |
| TFAP2B                                                               | transcription factor AP-2 beta                     | Group enriched      | 8,5    |       |         |              |   |             | k      | k, d+c (116) |
| <b>d. Collecting duct elevated genes (* only intercalated cells)</b> |                                                    |                     |        |       |         |              |   |             |        |              |
| AQP2                                                                 | aquaporin 2 (collecting duct)                      | Highly enriched     | 314,7  | KUPKB | g,p,d,c |              |   | KUPKB, UEPD | u      | k, c (117)   |
| HPN *                                                                | hepsin                                             | Enhanced            | 91,6   | KUPKB | p       |              |   |             |        | k, (118)     |
| TMEM213*                                                             | transmembrane protein 213                          | Group enriched      | 65,3   |       |         |              |   |             |        |              |
| ATP6V0D2 *                                                           | ATPase, H <sup>+</sup> transporting, V0 subunit d2 | Moderately enriched | 40,6   |       |         | KUPKB, HKUPP | g |             |        | k, (119)     |
| PVALB *                                                              | parvalbumin                                        | Moderately enriched | 40     | KUPKB | k (n.s) |              |   | KUPKB       |        | k, d (120)   |
| RHBG                                                                 | Rh family, B glycoprotein (gene/pseudogene)        | Group enriched      | 15,3   | KUPKB | p,d,c   |              |   |             |        | k, d+c (121) |
| SLC4A9                                                               | solute carrier family 4, member 9                  | Moderately enriched | 11,3   | KUPKB | p,d,c   |              |   |             |        | k, c (122)   |
| CLNK *                                                               | cytokine-dependent hematopoietic cell linker       | Enhanced            | 3,6    |       |         |              |   |             |        |              |

\* indicates proteins that are only found in the subsegment of intercalated cells of collecting duct.

Farrah (1) – Report of compiled MS datasets for blood, urine and kidney tissue. Farah T. *et al* (J Proteome Res. 2014 Jan 3;13(1):60-75)

‘literature’ – Previous publication that has characterised the protein in kidney cells or tissue.

Abbreviations:

K; kidney, g; glomeruli, p; proximal tubuli, d; distal tubuli, c; collecting duct; pl:plasma; u: urine

KUPKB; Kidney and Urinary Pathway Knowledge base (<http://www.kupkb.org/>). Omics datasets that have been extracted from scientific publications and other related renal databases.

HKUPP; Human Kidney and Urinary Proteome Project (<http://www.hkupp.org/>). Datasets of identified proteins localized in isolated human glomeruli using 2D SDS-PAGE and LC-MS/MS.

UEPD; Urinary Exosome Protein database (<http://dir.nhlbi.nih.gov/papers/lkem/exosome/>). Datasets of human urinary exosome proteins based on published and unpublished protein mass spectrometry data from the NHLBI Laboratory of Kidney and Electrolyte Metabolism.

## Supplementary Table S4 - References

| No | Title                                                                                                                                                                                                                           | URL              | Description                                                                                                                                                                                                                                                                          | Details | ShortDetails | Resource                                              | Type | Identifiers | Db | EntrezUID | Properties |
|----|---------------------------------------------------------------------------------------------------------------------------------------------------------------------------------------------------------------------------------|------------------|--------------------------------------------------------------------------------------------------------------------------------------------------------------------------------------------------------------------------------------------------------------------------------------|---------|--------------|-------------------------------------------------------|------|-------------|----|-----------|------------|
| 1  | State of the human proteome in 2013 as viewed through PeptideAtlas: comparing the kidney, urine, and plasma proteomes for the biology- and disease-driven Human Proteome Project.                                               | /pubmed/24261998 | Farrah T, Deutsch EW, Omenn GS, Sun Z, Watts JD, Yamamoto T, Shteynberg D, Harris MM, Moritz RL. J Proteome Res. 2014 Jan 3;13(1):60-75. doi: 10.1021/pr4010037. Epub 2013 Dec 6. J Proteome Res. 2014 PubMed citation PMID:24261998   PMCID:PMC3951210                              | pubmed  | 24261998     | create date:2013/11/23   first author:Farrah T        |      |             |    |           |            |
| 2  | Sulfate contributes to the negative charge of podocalyxin, the major sialoglycoprotein of the glomerular filtration slits.                                                                                                      | /pubmed/2052617  | Dekan G, Gabel C, Farquhar MG. Proc Natl Acad Sci U S A. 1991 Jun 15;88(12):5398-402. Proc Natl Acad Sci U S A. 1991 PubMed citation PMID:2052617   PMCID:PMC51880                                                                                                                   | pubmed  | 2052617      | create date:1991/06/15   first author:Dekan G         |      |             |    |           |            |
| 3  | FGF-1 in normal and regenerating kidney: expression in mononuclear, interstitial, and regenerating epithelial cells.                                                                                                            | /pubmed/7503231  | Ichimura T, Maier JA, Maciag T, Zhang G, Stevens JL. Am J Physiol. 1995 Nov;269(5 Pt 2):F653-62. Am J Physiol. 1995 PubMed citation PMID:7503231                                                                                                                                     | pubmed  | 7503231      | create date:1995/11/01   first author:Ichimura T      |      |             |    |           |            |
| 4  | Podocin localizes in the kidney to the slit diaphragm area.                                                                                                                                                                     | /pubmed/11786407 | Roselli S, Gribouval O, Boute N, Sich M, Benessy F, Atti T, Gubler MC, Antignac C. Am J Pathol. 2002 Jan;160(1):131-9. Am J Pathol. 2002 PubMed citation PMID:11786407   PMCID:PMC1867125                                                                                            | pubmed  | 11786407     | create date:2002/01/12   first author:Roselli S       |      |             |    |           |            |
| 5  | Novel expression of sodium/myo-inositol co-transporter in podocytes in puromycin aminonucleoside nephrosis.                                                                                                                     | /pubmed/15031335 | Watanabe Y, Kobayashi T, Yaoita E, Kawachi H, Yamauchi A, Inoue T, Shimizu F, Yoshida Y, El-Shemi AG, Okada H, Suzuki H, Yamamoto T. Nephrol Dial Transplant. 2004 Apr;19(4):817-22. Nephrol Dial Transplant. 2004 PubMed citation PMID:15031335                                     | pubmed  | 15031335     | create date:2004/03/20   first author:Watanabe Y      |      |             |    |           |            |
| 6  | Distribution of parathyroid hormone-2 receptor messenger ribonucleic acid in rat.                                                                                                                                               | /pubmed/8828488  | Usdin TB, Bonner TI, Harta G, Mezey E. Endocrinology. 1996 Oct;137(10):4285-97. Endocrinology. 1996 PubMed citation PMID:8828488                                                                                                                                                     | pubmed  | 8828488      | create date:1996/10/01   first author:Usdin TB        |      |             |    |           |            |
| 7  | Orphan receptor GPR110, an oncogene overexpressed in lung and prostate cancer.                                                                                                                                                  | /pubmed/20149256 | Lum AM, Wang BB, Beck-Engeser GB, Li L, Channa N, Wabl M. BMC Cancer. 2010 Feb 11;10:40. doi: 10.1186/1471-2407-10-40. BMC Cancer. 2010 PubMed citation PMID:20149256   PMCID:PMC2830182                                                                                             | pubmed  | 20149256     | create date:2010/02/13   first author:Lum AM          |      |             |    |           |            |
| 8  | Nephrin is specifically located at the slit diaphragm of glomerular podocytes.                                                                                                                                                  | /pubmed/10393930 | Ruotsalainen V, Ljungberg P, Wartiovaara J, Lenkkeri U, Kestilä M, Jalanko H, Holmberg C, Tryggvason K. Proc Natl Acad Sci U S A. 1999 Jul 6;96(14):7962-7. Proc Natl Acad Sci U S A. 1999 PubMed citation PMID:10393930   PMCID:PMC22170                                            | pubmed  | 10393930     | create date:1999/07/08   first author:Ruotsalainen V  |      |             |    |           |            |
| 9  | Molecular cloning of cDNAs encoding human GLEPP1, a membrane protein tyrosine phosphatase: characterization of the GLEPP1 protein distribution in human kidney and assignment of the GLEPP1 gene to human chromosome 12p12-p13. | /pubmed/7665166  | Wiggins RC, Wiggins JE, Goyal M, Wharram BL, Thomas PE. Genomics. 1995 May 1;27(1):174-81. Genomics. 1995 PubMed citation PMID:7665166                                                                                                                                               | pubmed  | 7665166      | create date:1995/05/01   first author:Wiggins RC      |      |             |    |           |            |
| 10 | Characterization of the Crumbs homolog 2 (CRB2) gene and analysis of its role in retinitis pigmentosa and Leber congenital amaurosis.                                                                                           | /pubmed/15851977 | van den Hurk JA, Rashbass P, Roepman R, Davis J, Voesenek KE, Arends ML, Zonneveld MN, van Roekel MH, Cameron K, Rohrschneider K, Heckenlively JR, Koenekoop RK, Hoyng CB, Cremers FP, den Hollander AI. Mol Vis. 2005 Apr 15;11:263-73. Mol Vis. 2005 PubMed citation PMID:15851977 | pubmed  | 15851977     | create date:2005/04/27   first author:van den Hurk JA |      |             |    |           |            |
| 11 | NKCC2 surface expression in mammalian cells: down-regulation by novel interaction with aldolase B.                                                                                                                              | /pubmed/17848580 | Benziane B, Demaretz S, Defontaine N, Zaarour N, Cheval L, Bourgeois S, Klein C, Froissart M, Blanchard A, Paillard M, Gamba G, Houillier P, Laghmani K. J Biol Chem. 2007 Nov 16;282(46):33817-30. Epub 2007 Sep 11. J Biol Chem. 2007 PubMed citation PMID:17848580                | pubmed  | 17848580     | create date:2007/09/13   first author:Benziane B      |      |             |    |           |            |
| 12 | Integrated transcriptomic and proteomic evaluation of gentamicin nephrotoxicity in rats.                                                                                                                                        | /pubmed/22061828 | Com E, Boitier E, Marchandeu JP, Brandenburg A, Schroeder S, Hoffmann D, Mally A, Gautier JC. Toxicol Appl Pharmacol. 2012 Jan 1;258(1):124-33. doi: 10.1016/j.taap.2011.10.015. Epub 2011 Oct 29. Toxicol Appl Pharmacol. 2012 PubMed citation PMID:22061828                        | pubmed  | 22061828     | create date:2011/11/09   first author:Com E           |      |             |    |           |            |
| 13 | Interactions of MAP17 with the NaPi-IIa/PDZK1 protein complex in renal proximal tubular cells.                                                                                                                                  | /pubmed/12837682 | Pribanic S, Gisler SM, Bacic D, Madjdpour C, Hernando N, Sorribas V, Gantenbein A, Biber J, Murer H. Am J Physiol Renal Physiol. 2003 Oct;285(4):F784-91. Epub 2003 Jul 1. Am J Physiol Renal Physiol. 2003 PubMed citation PMID:12837682                                            | pubmed  | 12837682     | create date:2003/07/03   first author:Pribanic S      |      |             |    |           |            |

- 14 Expression and function of arginine-producing and consuming-enzymes in the kidney. /pubmed/21567240 Levillain O. Amino Acids. 2012 Apr;42(4):1237-52. doi: 10.1007/s00726-011-0897-z. Epub 2011 May 13. Amino Acids. 2012 PubMed citation PMID:21567240 pubmed 21567240 create date:2011/05/14 | first author:Levillain O
- 15 Development of an immunoassay for the kidney-specific protein myo-inositol oxygenase, a potential biomarker of acute kidney injury./pubmed/24486646 Gaut JP, Crimmins DL, Ohlendorf MF, Lockwood CM, Griest TA, Brada NA, Hoshi M, Sato B, Hotchkiss RS, Jain S, Ladenson JH. Clin Chem. 2014 May;60(5):747-57. doi: 10.1373/clinchem.2013.212993. Epub 2014 Jan 31. Clin Chem. 2014 PubMed citation PMID:24486646 | PMCID:PMC4128578 pubmed 24486646 create date:2014/02/04 | first author:Gaut JP
- 16 The role of reversible phosphorylation in the hormonal control of phenylalanine hydroxylase in isolated rat proximal kidney tubules. /pubmed/8389135 Richardson SC, Aspbury RA, Fisher MJ. Biochem J. 1993 Jun 1;292 ( Pt 2):419-24. Biochem J. 1993 PubMed citation PMID:8389135 | PMCID:PMC1134225 pubmed 8389135 create date:1993/06/01 | first author:Richardson SC
- 17 Immunohistochemical detection of betaine-homocysteine S-methyltransferase in human, pig, and rat liver and kidney. /pubmed/11516176 Delgado-Reyes CV, Wallig MA, Garrow TA. Arch Biochem Biophys. 2001 Sep 1;393(1):184-6. Arch Biochem Biophys. 2001 PubMed citation PMID:11516176 pubmed 11516176 create date:2001/08/23 | first author:Delgado-Reyes CV
- 18 N-acetyltransferase 8, a positional candidate for blood pressure and renal regulation: resequencing, association and in silico study. /pubmed/18402670 Juhanson P, Kepp K, Org E, Veldre G, Kelgo P, Rosenberg M, Viigimaa M, Laan M. BMC Med Genet. 2008 Apr 10;9:25. doi: 10.1186/1471-2350-9-25. BMC Med Genet. 2008 PubMed citation PMID:18402670 | PMCID:PMC2330028 pubmed 18402670 create date:2008/04/12 | first author:Juhanson P
- 19 Role of angiotensin II in the enhancement of ammonia production and secretion by the proximal tubule in metabolic acidosis. /pubmed/18287403 Nagami GT. Am J Physiol Renal Physiol. 2008 Apr;294(4):F874-80. doi: 10.1152/ajprenal.00286.2007. Epub 2008 Feb 20. Am J Physiol Renal Physiol. 2008 PubMed citation PMID:18287403 pubmed 18287403 create date:2008/02/22 | first author:Nagami GT
- 20 High expression of bovine alpha glutathione S-transferase (GSTA1, GSTA2) subunits is mainly associated with steroidogenically active cells and regulated by gonadotropins in bovine ovarian follicles. /pubmed/10433206 Rabahi F, Br ㄱ ㄱ ㄱ S, Sirois J, Beckers JF, Silversides DW, Lussier JG. Endocrinology. 1999 Aug;140(8):3507-17. Endocrinology. 1999 PubMed citation PMID:10433206 pubmed 10433206 create date:1999/08/05 | first author:Rabahi F
- 21 PDZK1: I. a major scaffold in brush borders of proximal tubular cells. /pubmed/14531806 Gisler SM, Pribanic S, Bacic D, Forrer P, Gantenbein A, Sabourin LA, Tsuji A, Zhao ZS, Manser E, Biber J, Murer H. Kidney Int. 2003 Nov;64(5):1733-45. Kidney Int. 2003 PubMed citation PMID:14531806 pubmed 14531806 create date:2003/10/09 | first author:Gisler SM
- 22 N-acetylamino acid utilization by kidney aminoacylase-1. /pubmed/18222180 Lindner HA, T ㄱ ㄱ ㄱ fler-Naumann M, R ㄱ ㄱ ㄱ hm KH. Biochimie. 2008 May;90(5):773-80. doi: 10.1016/j.biochi.2007.12.006. Epub 2008 Jan 5. Biochimie. 2008 PubMed citation PMID:18222180 pubmed 18222180 create date:2008/01/29 | first author:Lindner HA
- 23 Betaine-homocysteine methyltransferase-2: cDNA cloning, gene sequence, physical mapping, and expression of the human and mouse genes. /pubmed/11087663 Chadwick LH, McCandless SE, Silverman GL, Schwartz S, Westaway D, Nadeau JH. Genomics. 2000 Nov 15;70(1):66-73. Genomics. 2000 PubMed citation PMID:11087663 pubmed 11087663 create date:2000/11/23 | first author:Chadwick LH
- 24 The molecular basis of cystinuria. /pubmed/15499206 Goodyer P. Nephron Exp Nephrol. 2004;98(2):e45-9. Review. Nephron Exp Nephrol. 2004 PubMed citation PMID:15499206 pubmed 15499206 create date:2004/10/23 | first author:Goodyer P
- 25 The effect of a low-protein diet and dietary supplementation of threonine on tyrosine and 2-(2-nitro-4-trifluoromethylbenzoyl) cyclohexane-1,3-dione-induced corneal lesions, the extent of tyrosinemia, and the activity of enzymes involved in tyrosine catabolism in the rat. /pubmed/9630461 Lock EA, Gaskin P, Ellis MK, Robinson M, Provan WM, Smith LL. Toxicol Appl Pharmacol. 1998 May;150(1):125-32. Toxicol Appl Pharmacol. 1998 PubMed citation PMID:9630461 pubmed 9630461 create date:1998/06/19 | first author:Lock EA
- 26 Sodium-coupled dicarboxylate and citrate transporters from the SLC13 family. /pubmed/24114175 Pajor AM. Pflugers Arch. 2014 Jan;466(1):119-30. doi: 10.1007/s00424-013-1369-y. Epub 2013 Oct 10. Review. Pflugers Arch. 2014 PubMed citation PMID:24114175 pubmed 24114175 create date:2013/10/12 | first author:Pajor AM
- 27 Purification, characterization and differentiation-dependent expression of a perchloric acid soluble protein from rat kidney. /pubmed/9609467 Asagi K, Oka T, Arao K, Suzuki I, Thakur MK, Izumi K, Natori Y. Nephron. 1998;79(1):80-90. Nephron. 1998 PubMed citation PMID:9609467 pubmed 9609467 create date:1998/06/03 | first author:Asagi K
- 28 Expression and cellular localization of kininogens in the human kidney. /pubmed/8807575 Hermann A, Braun A, Figueroa CD, M ㄱ ㄱ ㄱ ller-Esterl W, Fritz H, Rehbock J. Kidney Int. 1996 Jul;50(1):79-84. Kidney Int. 1996 PubMed citation PMID:8807575 pubmed 8807575 create date:1996/07/01 | first author:Hermann A
- 29 Sex-dependent expression of Oat3 (Slc22a8) and Oat1 (Slc22a6) proteins in murine kidneys. /pubmed/23389457 Breljak D, Brzica H, Sweet DH, Anzai N, Sabolic I. Am J Physiol Renal Physiol. 2013 Apr 15;304(8):F1114-26. doi: 10.1152/ajprenal.00201.2012. Epub 2013 Feb 6. Am J Physiol Renal Physiol. 2013 PubMed citation PMID:23389457 | PMCID:PMC3625837 pubmed 23389457 create date:2013/02/08 | first author:Breljak D

- 30 Designation of enzyme activity of glycine-N-acyltransferase family genes and depression of glycine-N-acyltransferase in human hepatocellular carcinoma. /pubmed/22475485 Matsuo M, Terai K, Kameda N, Matsumoto A, Kurokawa Y, Funase Y, Nishikawa K, Sugaya N, Hiruta N, Kishimoto T. *Biochem Biophys Res Commun.* 2012 Apr 20;420(4):901-6. doi: 10.1016/j.bbrc.2012.03.099. Epub 2012 Mar 27. *Biochem Biophys Res Commun.* 2012 PubMed citation PMID:22475485 pubmed 22475485 create date:2012/04/06 | first author:Matsuo M
- 31 Proteomic analysis of clear cell renal cell carcinoma. Identification of potential tumor markers. /pubmed/20464042 Sun CY, Zang YC, San YX, Sun W, Zhang L. *Saudi Med J.* 2010 May;31(5):525-32. *Saudi Med J.* 2010 PubMed citation PMID:20464042 pubmed 20464042 create date:2010/05/14 | first author:Sun CY
- 32 Genomic structure, alternative maturation and tissue expression of the human BBOX1 gene. /pubmed/17110165 Rigault C, Le Borgne F, Demarquoy J. *Biochim Biophys Acta.* 2006 Dec;1761(12):1469-81. Epub 2006 Oct 4. *Biochim Biophys Acta.* 2006 PubMed citation PMID:17110165 pubmed 17110165 create date:2006/11/18 | first author:Rigault C
- 33 Four distinct membrane-bound dipeptidase RNAs are differentially expressed and show discordant regulation with gamma-glutamyl transpeptidase. /pubmed/8663190 Habib GM, Barrios R, Shi ZZ, Lieberman MW. *J Biol Chem.* 1996 Jul 5;271(27):16273-80. *J Biol Chem.* 1996 PubMed citation PMID:8663190 pubmed 8663190 create date:1996/07/05 | first author:Habib GM
- 34 Different hydrolases involved in bioactivation of prodrug-type angiotensin receptor blockers: carboxymethylenebutenolidase and carboxylesterase 1. /pubmed/23946449 Ishizuka T, Yoshigae Y, Murayama N, Izumi T. *Drug Metab Dispos.* 2013 Nov;41(11):1888-95. doi: 10.1124/dmd.113.053595. Epub 2013 Aug 14. *Drug Metab Dispos.* 2013 PubMed citation PMID:23946449 pubmed 23946449 create date:2013/08/16 | first author:Ishizuka T
- 35 Designation of enzyme activity of glycine-N-acyltransferase family genes and depression of glycine-N-acyltransferase in human hepatocellular carcinoma. /pubmed/22475485 Matsuo M, Terai K, Kameda N, Matsumoto A, Kurokawa Y, Funase Y, Nishikawa K, Sugaya N, Hiruta N, Kishimoto T. *Biochem Biophys Res Commun.* 2012 Apr 20;420(4):901-6. doi: 10.1016/j.bbrc.2012.03.099. Epub 2012 Mar 27. *Biochem Biophys Res Commun.* 2012 PubMed citation PMID:22475485 pubmed 22475485 create date:2012/04/06 | first author:Matsuo M
- 36 Renal dopaminergic mechanisms in renal parenchymal diseases and hypertension. /pubmed/11369822 Pestana M, Jardim H, Correia F, Vieira-Coelho MA, Soares-da-Silva P. *Nephrol Dial Transplant.* 2001;16 Suppl 1:53-9. Review. *Nephrol Dial Transplant.* 2001 PubMed citation PMID:11369822 pubmed 11369822 create date:2001/05/23 | first author:Pestana M
- 37 Metabolic effects of large fructose loads in different parts of the rat nephron. /pubmed/6773936 Burch HB, Choi S, Dence CN, Alvey TR, Cole BR, Lowry OH. *J Biol Chem.* 1980 Sep 10;255(17):8239-44. *J Biol Chem.* 1980 PubMed citation PMID:6773936 pubmed 6773936 create date:1980/09/10 | first author:Burch HB
- 38 SLC7A7, encoding a putative permease-related protein, is mutated in patients with lysinuric protein intolerance. /pubmed/10080183 Borsani G, Bassi MT, Sperandeo MP, De Grandi A, Buoninconti A, Riboni M, Manzoni M, Incerti B, Pepe A, Andria G, Ballabio A, Sebastio G. *Nat Genet.* 1999 Mar;21(3):297-301. *Nat Genet.* 1999 PubMed citation PMID:10080183 pubmed 10080183 create date:1999/03/18 | first author:Borsani G
- 39 Differential localization of flavin-containing monooxygenase (FMO) isoforms 1, 3, and 4 in rat liver and kidney and evidence for expression of FMO4 in mouse, rat, and human liver and kidney microsomes. /pubmed/19307449 Novick RM, Mitzey AM, Brownfield MS, Elfarra AA. *J Pharmacol Exp Ther.* 2009 Jun;329(3):1148-55. doi: 10.1124/jpet.109.152058. Epub 2009 Mar 23. *J Pharmacol Exp Ther.* 2009 PubMed citation PMID:19307449 | PMCID:PMC2683785 pubmed 19307449 create date:2009/03/25 | first author:Novick RM
- 40 Serine isotopmer analysis by <sup>13</sup>C-NMR defines glycine-serine interconversion in situ in the renal proximal tubule. /pubmed/9244172 Cowin GJ, Willgoss DA, Bartley J, Endre ZH. *Biochim Biophys Acta.* 1996 Jan 10;1310(1):32-40. *Biochim Biophys Acta.* 1996 PubMed citation PMID:9244172 pubmed 9244172 create date:1997/01/10 | first author:Cowin GJ
- 41 A novel gene family defined by human dihydropyrimidinase and three related proteins with differential tissue distribution. /pubmed/8973361 Hamajima N, Matsuda K, Sakata S, Tamaki N, Sasaki M, Nonaka M. *Gene.* 1996 Nov 21;180(1-2):157-63. *Gene.* 1996 PubMed citation PMID:8973361 pubmed 8973361 create date:1996/11/21 | first author:Hamajima N
- 42 The SLC34 family of sodium-dependent phosphate transporters. /pubmed/24352629 Wagner CA, Hernando N, Forster IC, Biber J. *Pflugers Arch.* 2014 Jan;466(1):139-53. doi: 10.1007/s00424-013-1418-6. Epub 2013 Dec 19. Review. *Pflugers Arch.* 2014 PubMed citation PMID:24352629 pubmed 24352629 create date:2013/12/20 | first author:Wagner CA
- 43 Human mitochondrial phosphoenolpyruvate carboxykinase 2 gene. Structure, chromosomal localization and tissue-specific expression. /pubmed/9657976 Modaresi S, Brechtel K, Christ B, Jungermann K. *Biochem J.* 1998 Jul 15;333 ( Pt 2):359-66. *Biochem J.* 1998 PubMed citation PMID:9657976 | PMCID:PMC1219593 pubmed 9657976 create date:1998/07/11 | first author:Modaresi S
- 44 SLC7A8, a gene mapping within the lysinuric protein intolerance critical region, encodes a new member of the glycoprotein-associated amino acid transporter family. /pubmed/10610726 Bassi MT, Sperandeo MP, Incerti B, Bulfone A, Pepe A, Surace EM, Gattuso C, De Grandi A, Buoninconti A, Riboni M, Manzoni M, Andria G, Ballabio A, Borsani G, Sebastio G. *Genomics.* 1999 Dec 1;62(2):297-303. *Genomics.* 1999 PubMed citation PMID:10610726 pubmed 10610726 create date:1999/12/28 | first author:Bassi MT
- 45 Cloning and characterization of human FTCD on 21q22.3, a candidate gene for glutamate formiminotransferase deficiency. /pubmed/10773664 Solans A, Estivill X, de la Luna S. *Cytogenet Cell Genet.* 2000;88(1-2):43-9. *Cytogenet Cell Genet.* 2000 PubMed citation PMID:10773664 pubmed 10773664 create date:2000/04/25 | first author:Solans A
- 46 Human agmatinase is diminished in the clear cell type of renal cell carcinoma. /pubmed/14648699 Dallmann K, Junker H, Balabanov S, Zimmermann U, Giebel J, Walther R. *Int J Cancer.* 2004 Jan 20;108(3):342-7. *Int J Cancer.* 2004 PubMed citation PMID:14648699 pubmed 14648699 create date:2003/12/04 | first author:Dallmann K

- 47 Tissue specificity of rat mitochondrial dimethylglycine dehydrogenase expression. /pubmed/7513513 Lang H, Minaian K, Freudenberg N, Hoffmann R, Brandsch R. Biochem J. 1994 Apr 15;299 ( Pt 2):393-8. Biochem J. 1994 PubMed citation PMID:7513513 | PMCID:PMC1138285 pubmed 7513513 create date:1994/04/15 | first author:Lang H
- 48 Localization of adenylate kinase 4 in mouse tissues. /pubmed/19492028 Miyoshi K, Akazawa Y, Horiguchi T, Noma T. Acta Histochem Cytochem. 2009 Apr 28;42(2):55-64. doi: 10.1267/ahc.08012. Epub 2009 Apr 7. Acta Histochem Cytochem. 2009 PubMed citation PMID:19492028 | PMCID:PMC2685024 pubmed 19492028 create date:2009/06/06 | first author:Miyoshi K
- 49 gamma-Glutamyl transpeptidase catalyses the extracellular detoxification of cisplatin in a human cell line derived from the proximal convoluted tubule of the kidney. /pubmed/12706370 Paolicchi A, Sotiropoulou M, Perego P, Daubeuf S, Visvikis A, Lorenzini E, Franzini M, Romiti N, Chieli E, Leone R, Apostoli P, Colangelo D, Zunino F, Pompella A. Eur J Cancer. 2003 May;39(7):996-1003. Eur J Cancer. 2003 PubMed citation PMID:12706370 pubmed 12706370 create date:2003/04/23 | first author:Paolicchi A
- 50 Klotho: a novel phosphaturic substance acting as an autocrine enzyme in the renal proximal tubule. /pubmed/20466874 Hu MC, Shi M, Zhang J, Pastor J, Nakatani T, Lanske B, Razzaque MS, Rosenblatt KP, Baum MG, Kuro-o M, Moe OW. FASEB J. 2010 Sep;24(9):3438-50. doi: 10.1096/fj.10-154765. Epub 2010 May 13. FASEB J. 2010 PubMed citation PMID:20466874 | PMCID:PMC2923354 pubmed 20466874 create date:2010/05/15 | first author:Hu MC
- 51 Mouse amnionless, which is required for primitive streak assembly, mediates cell-surface localization and endocytic function of cubilin on visceral endoderm and kidney proximal tubules. /pubmed/15342463 Strobe S, Rivi R, Metzger T, Manova K, Lacy E. Development. 2004 Oct;131(19):4787-95. Epub 2004 Sep 1. Erratum in: Development. 2004 Oct;131(4):5211. Development. 2004 PubMed citation PMID:15342463 pubmed 15342463 create date:2004/09/03 | first author:Strobe S
- 52 Mistargeting of peroxisomal EHHADH and inherited renal Fanconi's syndrome. /pubmed/24401050 Klootwijk ED, Reichold M, Helip-Wooley A, Tolaymat A, Broeker C, Robinette SL, Reinders J, Peindl D, Renner K, Eberhart K, Assmann N, Oefner PJ, Dettmer K, Sterner C, Schroeder J, Zorger N, Witzgall R, Reinhold SW, Stanescu HC, Bockenhauer D, Jaureguiberry G, Courtneidge H, et al. N Engl J Med. 2014 Jan 9;370(2):129-38. doi: 10.1056/NEJMoa1307581. N Engl J Med. 2014 PubMed citation PMID:24401050 pubmed 24401050 create date:2014/01/10 | first author:Klootwijk ED
- 53 Human alanine-glyoxylate aminotransferase 2 lowers asymmetric dimethylarginine and protects from inhibition of nitric oxide production. /pubmed/20018850 Rodionov RN, Murry DJ, Vaulman SF, Stevens JW, Lentz SR. J Biol Chem. 2010 Feb 19;285(8):5385-91. doi: 10.1074/jbc.M109.091280. Epub 2009 Dec 14. J Biol Chem. 2010 PubMed citation PMID:20018850 | PMCID:PMC2820767 pubmed 20018850 create date:2009/12/19 | first author:Rodionov RN
- 54 A novel superoxide-producing NAD(P)H oxidase in kidney. /pubmed/11032835 Shiose A, Kuroda J, Tsuruya K, Hirai M, Hirakata H, Naito S, Hattori M, Sakaki Y, Sumimoto H. J Biol Chem. 2001 Jan 12;276(2):1417-23. J Biol Chem. 2001 PubMed citation PMID:11032835 pubmed 11032835 create date:2000/10/18 | first author:Shiose A
- 55 Apolipoprotein M: progress in understanding its regulation and metabolic functions. /pubmed/17101555 Christoffersen C, Dahlbæk B, Nielsen LB. Scand J Clin Lab Invest. 2006;66(7):631-7. Review. Scand J Clin Lab Invest. 2006 PubMed citation PMID:17101555 pubmed 17101555 create date:2006/11/15 | first author:Christoffersen C
- 56 Characterization of monocarboxylate transport in human kidney HK-2 cells. /pubmed/17140255 Wang Q, Lu Y, Yuan M, Darling IM, Repasky EA, Morris ME. Mol Pharm. 2006 Nov-Dec;3(6):675-85. Mol Pharm. 2006 PubMed citation PMID:17140255 pubmed 17140255 create date:2006/12/05 | first author:Wang Q
- 57 Renal transport of uric acid: evolving concepts and uncertainties. /pubmed/23089270 Bobulescu IA, Moe OW. Adv Chronic Kidney Dis. 2012 Nov;19(6):358-71. doi: 10.1053/j.ackd.2012.07.009. Review. Adv Chronic Kidney Dis. 2012 PubMed citation PMID:23089270 | PMCID:PMC3619397 pubmed 23089270 create date:2012/10/24 | first author:Bobulescu IA
- 58 Changes in kynurenine pathway metabolism in the brain, liver and kidney of aged female Wistar rats. /pubmed/22032336 Braidy N, Guillemin GJ, Mansour H, Chan-Ling T, Grant R. FEBS J. 2011 Nov;278(22):4425-34. doi: 10.1111/j.1742-4658.2011.08366.x. FEBS J. 2011 PubMed citation PMID:22032336 pubmed 22032336 create date:2011/10/29 | first author:Braidyn N
- 59 Common missense variant of monocarboxylate transporter 9 (MCT9/SLC16A9) gene is associated with renal overload gout, but not with all gout susceptibility. /pubmed/23990105 Nakayama A, Matsuo H, Shimizu T, Ogata H, Takada Y, Nakashima H, Nakamura T, Shimizu S, Chiba T, Sakiyama M, Ushiyama C, Takada T, Inoue K, Kawai S, Hishida A, Wakai K, Hamajima N, Ichida K, Sakurai Y, Kato Y, Shimizu T, Shinomiya N. Hum Cell. 2013 Dec;26(4):133-6. doi: 10.1007/s13577-013-0073-8. Epub 2013 Aug 29. Hum Cell. 2013 PubMed citation PMID:23990105 | PMCID:PMC3844819 pubmed 23990105 create date:2013/08/31 | first author:Nakayama A
- 60 Localization of NBC-1 variants in human kidney and renal cell carcinoma. /pubmed/14559244 Yamada H, Yamazaki S, Moriyama N, Hara C, Horita S, Enomoto Y, Kudo A, Kawakami H, Tanaka Y, Fujita T, Seki G. Biochem Biophys Res Commun. 2003 Oct 31;310(4):1213-8. Biochem Biophys Res Commun. 2003 PubMed citation PMID:14559244 pubmed 14559244 create date:2003/10/16 | first author:Yamada H
- 61 Structural organization of the human sorbitol dehydrogenase gene (SORD). /pubmed/7782086 Iwata T, Popescu NC, Zimonjic DB, Karlsson C, Hara T, Vaca G, Rodriguez IR, Carper D. Genomics. 1995 Mar 1;26(1):55-62. Genomics. 1995 PubMed citation PMID:7782086 pubmed 7782086 create date:1995/03/01 | first author:Iwata T
- 62 Human sodium phosphate transporter 4 (hNPT4/SLC17A3) as a common renal secretory pathway for drugs and urate. /pubmed/20810651 Jutabha P, Anzai N, Kitamura K, Taniguchi A, Kaneko S, Yan K, Yamada H, Shimada H, Kimura T, Katada T, Fukutomi T, Tomita K, Urano W, Yamanaka H, Seki G, Fujita T, Moriyama Y, Yamada A, Uchida S, Wempe MF, Endou H, Sakurai H. J Biol Chem. 2010 Nov



- 5;285(45):35123-32. doi: 10.1074/jbc.M110.121301. Epub 2010 Sep 1. J Biol Chem. 2010 PubMed citation PMID:20810651 | PMCID:PMC2966126 pubmed 20810651 create date:2010/09/03 | first author:Jutabha P
- 63 Human TMEM174 that is highly expressed in kidney tissue activates AP-1 and promotes cell proliferation. /pubmed/20331980 Wang P, Sun B, Hao D, Zhang X, Shi T, Ma D. Biochem Biophys Res Commun. 2010 Apr 16;394(4):993-9. doi: 10.1016/j.bbrc.2010.03.109. Epub 2010 Mar 21. Erratum in: Biochem Biophys Res Commun. 2011 Jan 7;404(1):580. Biochem Biophys Res Commun. 2010 PubMed citation PMID:20331980 pubmed 20331980 create date:2010/03/25 | first author:Wang P
- 64 Novel renal amino acid transporters. /pubmed/15709970 Verrey F, Ristic Z, Romeo E, Ramadan T, Makrides V, Dave MH, Wagner CA, Camargo SM. Annu Rev Physiol. 2005;67:557-72. Review. Annu Rev Physiol. 2005 PubMed citation PMID:15709970 pubmed 15709970 create date:2005/02/16 | first author:Verrey F
- 65 Triglyceride accumulation in injured renal tubular cells: alterations in both synthetic and catabolic pathways. /pubmed/15882263 Johnson AC, Stahl A, Zager RA. Kidney Int. 2005 Jun;67(6):2196-209. Kidney Int. 2005 PubMed citation PMID:15882263 pubmed 15882263 create date:2005/05/11 | first author:Johnson AC
- 66 Identification and expression of a cDNA encoding human alpha-amino-beta-carboxymuconate-epsilon-semialdehyde decarboxylase (ACMSD). A key enzyme for the tryptophan-niacine pathway and quinolinate hypothesis". /pubmed/12140278 Fukuoka S, Ishiguro K, Yanagihara K, Tanabe A, Egashira Y, Sanada H, Shibata K. J Biol Chem. 2002 Sep 20;277(38):35162-7. Epub 2002 Jul 24. J Biol Chem. 2002 PubMed citation PMID:12140278 pubmed 12140278 create date:2002/07/26 | first author:Fukuoka S
- 67 Transcriptional analysis of the molecular basis of human kidney aging using cDNA microarray profiling. /pubmed/16316342 Melk A, Mansfield ES, Hsieh SC, Hernandez-Boussard T, Grimm P, Rayner DC, Halloran PF, Sarwal MM. Kidney Int. 2005 Dec;68(6):2667-79. Kidney Int. 2005 PubMed citation PMID:16316342 pubmed 16316342 create date:2005/12/01 | first author:Melk A
- 68 Gene expression analysis defines the proximal tubule as the compartment for endocytic receptor-mediated uptake in the *Xenopus* pronephric kidney. /pubmed/18551302 Christensen EI, Raciti D, Reggiani L, Verroust PJ, Br  $\bar{\tau}$ , ndli AW. Pflugers Arch. 2008 Sep;456(6):1163-76. doi: 10.1007/s00424-008-0488-3. Epub 2008 Jun 13. Pflugers Arch. 2008 PubMed citation PMID:18551302 pubmed 18551302 create date:2008/06/14 | first author:Christensen EI
- 69 Na<sup>+</sup>-sulfate cotransporter SLC13A1. /pubmed/24193406 Markovich D. Pflugers Arch. 2014 Jan;466(1):131-7. doi: 10.1007/s00424-013-1388-8. Epub 2013 Nov 6. Review. Pflugers Arch. 2014 PubMed citation PMID:24193406 pubmed 24193406 create date:2013/11/07 | first author:Markovich D
- 70 Expression of retinoic acid-synthesizing and -metabolizing enzymes during nephrogenesis in the rat. /pubmed/15567713 Marlier A, Gilbert T. Gene Expr Patterns. 2004 Dec;5(2):179-85. Gene Expr Patterns. 2004 PubMed citation PMID:15567713 pubmed 15567713 create date:2004/11/30 | first author:Marlier A
- 71 Renal imino acid and glycine transport system ontogeny and involvement in developmental iminoglycinuria. /pubmed/20377526 Vanslambrouck JM, Br  $\bar{\tau}$  er A, Thavyogarah T, Holst J, Bailey CG, Br  $\bar{\tau}$  er S, Rasko JE. Biochem J. 2010 May 27;428(3):397-407. doi: 10.1042/BJ20091667. Biochem J. 2010 PubMed citation PMID:20377526 pubmed 20377526 create date:2010/04/10 | first author:Vanslambrouck JM
- 72 Mutation of solute carrier SLC16A12 associates with a syndrome combining juvenile cataract with microcornea and renal glucosuria. /pubmed/18304496 Kloeckener-Gruissem B, Vandekerckhove K, N  $\bar{\tau}$  rnb erg G, Neidhardt J, Zeitz C, N  $\bar{\tau}$  rnb erg P, Schipper I, Berger W. Am J Hum Genet. 2008 Mar;82(3):772-9. doi: 10.1016/j.ajhg.2007.12.013. Epub 2008 Feb 14. Am J Hum Genet. 2008 PubMed citation PMID:18304496 | PMCID:PMC2427214 pubmed 18304496 create date:2008/02/29 | first author:Kloeckener-Gruissem B
- 73 Localization of D-amino acid oxidase mRNA in the mouse kidney and the effect of testosterone treatment. /pubmed/8574884 Koibuchi N, Konno R, Matsuzaki S, Ohtake H, Niwa A, Yamaoka S. Histochem Cell Biol. 1995 Nov;104(5):349-55. Histochem Cell Biol. 1995 PubMed citation PMID:8574884 pubmed 8574884 create date:1995/11/01 | first author:Koibuchi N
- 74 The anti-apoptotic effect of regucalcin is mediated through multisingaling pathways. /pubmed/23670020 Yamaguchi M. Apoptosis. 2013 Oct;18(10):1145-53. doi: 10.1007/s10495-013-0859-x. Review. Apoptosis. 2013 PubMed citation PMID:23670020 | PMCID:PMC3775152 pubmed 23670020 create date:2013/05/15 | first author:Yamaguchi M
- 75 Non-type I cystinuria caused by mutations in SLC7A9, encoding a subunit (bo,+AT) of rBAT. /pubmed/10471498 Feliubadal  $\bar{\tau}$  L, Font M, Purroy J, Rousaud F, Estivill X, Nunes V, Golomb E, Centola M, Aksentijevich I, Kreiss Y, Goldman B, Pras M, Kastner DL, Pras E, Gasparini P, Bisceglia L, Beccia E, Gallucci M, de Sanctis L, Ponzone A, Rizzoni GF, Zelante L, et al. Nat Genet. 1999 Sep;23(1):52-7. Nat Genet. 1999 PubMed citation PMID:10471498 pubmed 10471498 create date:1999/09/02 | first author:Feliubadal  $\bar{\tau}$  L
- 76 SGLT2 mediates glucose reabsorption in the early proximal tubule. /pubmed/20616166 Vallon V, Platt KA, Cunard R, Schroth J, Whaley J, Thomson SC, Koepsell H, Rieg T. J Am Soc Nephrol. 2011 Jan;22(1):104-12. doi: 10.1681/ASN.2010030246. Epub 2010 Jul 8. J Am Soc Nephrol. 2011 PubMed citation PMID:20616166 | PMCID:PMC3014039 pubmed 20616166 create date:2010/07/10 | first author:Vallon V
- 77 Cloning and expression of bovine sodium/glucose cotransporters. /pubmed/15591382 Zhao FQ, Zheng YC, Wall EH, McFadden TB. J Dairy Sci. 2005 Jan;88(1):182-94. J Dairy Sci. 2005 PubMed citation PMID:15591382 pubmed 15591382 create date:2004/12/14 | first author:Zhao FQ

- 78 Differential kidney proteome profiling in a murine model of renal fibrosis under treatment with mycophenolate mofetil. /pubmed/21613803 Petrova DT, Brehmer F, Schultze FC, Asif AR, Gross O, Oellerich M, Brandhorst G. Pathobiology. 2011;78(3):162-70. doi: 10.1159/000324597. Epub 2011 May 26. Pathobiology. 2011 PubMed citation PMID:21613803 pubmed 21613803 create date:2011/05/27 | first author:Petrova DT
- 79 Human organic anion transporters and human organic cation transporters mediate renal transport of prostaglandins. /pubmed/11907186 Kimura H, Takeda M, Narikawa S, Enomoto A, Ichida K, Endou H. J Pharmacol Exp Ther. 2002 Apr;301(1):293-8. J Pharmacol Exp Ther. 2002 PubMed citation PMID:11907186 pubmed 11907186 create date:2002/03/22 | first author:Kimura H
- 80 Determination of choline dehydrogenase activity along the rat nephron. /pubmed/8868068 Miller B, Schmid H, Chen TJ, Schmolke M, Guder WG. Biol Chem Hoppe Seyler. 1996 Feb;377(2):129-37. Biol Chem Hoppe Seyler. 1996 PubMed citation PMID:8868068 pubmed 8868068 create date:1996/02/01 | first author:Miller B
- 81 Human renal organic anion transporter 4 operates as an asymmetric urate transporter. /pubmed/17229912 Hagos Y, Stein D, Ugele B, Burckhardt G, Bahn A. J Am Soc Nephrol. 2007 Feb;18(2):430-9. Epub 2007 Jan 17. J Am Soc Nephrol. 2007 PubMed citation PMID:17229912 pubmed 17229912 create date:2007/01/19 | first author:Hagos Y
- 82 Plasma urate level is directly regulated by a voltage-driven urate efflux transporter URATv1 (SLC2A9) in humans. /pubmed/18701466 Anzai N, Ichida K, Jutabha P, Kimura T, Babu E, Jin CJ, Srivastava S, Kitamura K, Hisatome I, Endou H, Sakurai H. J Biol Chem. 2008 Oct 3;283(40):26834-8. doi: 10.1074/jbc.C800156200. Epub 2008 Aug 13. Erratum in: J Biol Chem. 2008 Nov 14;283(46):32152. J Biol Chem. 2008 PubMed citation PMID:18701466 pubmed 18701466 create date:2008/08/15 | first author:Anzai N
- 83 Formation of 20-hydroxyeicosatetraenoic acid, a vasoactive and natriuretic eicosanoid, in human kidney. Role of Cyp4F2 and Cyp4A11. /pubmed/10660572 Lasker JM, Chen WB, Wolf I, Blowski BP, Wilson PD, Powell PK. J Biol Chem. 2000 Feb 11;275(6):4118-26. J Biol Chem. 2000 PubMed citation PMID:10660572 pubmed 10660572 create date:2000/02/08 | first author:Lasker JM
- 84 Immunohistochemical localization of sodium-dependent L-ascorbic acid transporter 1 protein in rat kidney. /pubmed/16673096 Lee JH, Oh CS, Mun GH, Kim JH, Chung YH, Hwang YI, Shin DH, Lee WJ. Histochem Cell Biol. 2006 Oct;126(4):491-4. Epub 2006 May 4. Histochem Cell Biol. 2006 PubMed citation PMID:16673096 pubmed 16673096 create date:2006/05/05 | first author:Lee JH
- 85 Evi27 encodes a novel membrane protein with homology to the IL17 receptor. /pubmed/10815801 Tian E, Sawyer JR, Largaespada DA, Jenkins NA, Copeland NG, Shaughnessy JD Jr. Oncogene. 2000 Apr 20;19(17):2098-109. Oncogene. 2000 PubMed citation PMID:10815801 pubmed 10815801 create date:2000/05/18 | first author:Tian E
- 86 Cloning, functional characterization, and localization of a rat renal Na<sup>+</sup>-dicarboxylate transporter. /pubmed/9691021 Sekine T, Cha SH, Hosoyamada M, Kanai Y, Watanabe N, Furuta Y, Fukuda K, Igarashi T, Endou H. Am J Physiol. 1998 Aug;275(2 Pt 2):F298-305. Am J Physiol. 1998 PubMed citation PMID:9691021 pubmed 9691021 create date:1998/08/05 | first author:Sekine T
- 87 Identification of UDP glycosyltransferase 3A1 as a UDP N-acetylglucosaminyltransferase. /pubmed/18981171 Mackenzie PI, Rogers A, Treloar J, Jorgensen BR, Miners JO, Meech R. J Biol Chem. 2008 Dec 26;283(52):36205-10. doi: 10.1074/jbc.M807961200. Epub 2008 Nov 3. J Biol Chem. 2008 PubMed citation PMID:18981171 | PMCID:PMC2662294 pubmed 18981171 create date:2008/11/05 | first author:Mackenzie PI
- 88 PAX2 activates WNT4 expression during mammalian kidney development. /pubmed/16368682 Torban E, Dziarmaga A, Iglesias D, Chu LL, Vassilieva T, Little M, Eccles M, Discenza M, Pelletier J, Goodyer P. J Biol Chem. 2006 May 5;281(18):12705-12. Epub 2005 Dec 19. J Biol Chem. 2006 PubMed citation PMID:16368682 pubmed 16368682 create date:2005/12/22 | first author:Torban E
- 89 Isolation, sequence identification and tissue expression profiles of 3 novel porcine genes: ASPA, NAGA, and HEXA. /pubmed/18670062 Shu X, Liu Y, Yang L, Song C, Hou J. J Appl Genet. 2008;49(3):257-61. doi: 10.1007/BF03195622. J Appl Genet. 2008 PubMed citation PMID:18670062 pubmed 18670062 create date:2008/08/02 | first author:Shu X
- 90 Expression of concentrative nucleoside transporters SLC28 (CNT1, CNT2, and CNT3) along the rat nephron: effect of diabetes. /pubmed/16014043 Rodr uez-Mulero S, Errasti-Murugarren E, Ballar uez-Mulero S, Felipe A, Doucet A, Casado FJ, Pastor-Anglada M. Kidney Int. 2005 Aug;68(2):665-72. Kidney Int. 2005 PubMed citation PMID:16014043 pubmed 16014043 create date:2005/07/15 | first author:Rodr uez-Mulero S
- 91 Physiological oxygenation status is required for fully differentiated phenotype in kidney cortex proximal tubules. /pubmed/16597615 de Laplanche E, Gouget K, Cl ris G, Dragounoff F, Demont J, Morales A, Bezin L, Godinot C, Perri re G, Mouchiroud D, Simonnet H. Am J Physiol Renal Physiol. 2006 Oct;291(4):F750-60. Epub 2006 Apr 4. Am J Physiol Renal Physiol. 2006 PubMed citation PMID:16597615 pubmed 16597615 create date:2006/04/07 | first author:de Laplanche E
- 92 Rat brain aspartate <sup>-</sup>-decarboxylase. A comparative study with the liver enzyme. /pubmed/20492933 Wong PT. Neurochem Int. 1985;7(2):351-5. Neurochem Int. 1985 PubMed citation PMID:20492933 pubmed 20492933 create date:1985/01/01 | first author:Wong PT
- 93 Peripheral distribution of kynurenine metabolites and activity of kynurenine pathway enzymes in renal failure. /pubmed/12832720 Pawlak D, Tankiewicz A, Matys T, Buczko W. J Physiol Pharmacol. 2003 Jun;54(2):175-89. J Physiol Pharmacol. 2003 PubMed citation PMID:12832720 pubmed 12832720 create date:2003/07/02 | first author:Pawlak D

- 94 Regulation of renin secretion by renal juxtaglomerular cells. /pubmed/22733355 Friis UG, Madsen K, Stubbe J, Hansen PB, Svenningsen P, Bie P, Skott O, Jensen BL. Pflugers Arch. 2013 Jan;465(1):25-37. doi: 10.1007/s00424-012-1126-7. Epub 2012 Jun 26. Review. Pflugers Arch. 2013 PubMed citation PMID:22733355 pubmed 22733355 create date:2012/06/27 | first author:Friis UG
- 95 Biochemical and molecular characterization of a novel choline-specific glycerophosphodiester phosphodiesterase belonging to the nucleotide pyrophosphatase/phosphodiesterase family. /pubmed/15788404 Sakagami H, Aoki J, Natori Y, Nishikawa K, Kakehi Y, Natori Y, Arai H. J Biol Chem. 2005 Jun 17;280(24):23084-93. Epub 2005 Mar 23. J Biol Chem. 2005 PubMed citation PMID:15788404 pubmed 15788404 create date:2005/03/25 | first author:Sakagami H
- 96 The betaine/GABA transporter and betaine: roles in brain, kidney, and liver. /pubmed/24795654 Kempson SA, Zhou Y, Danbolt NC. Front Physiol. 2014;5:159. doi: 10.3389/fphys.2014.00159. Review. Front Physiol. 2014 PubMed citation PMID:24795654 | PMCID:PMC4006062 pubmed 24795654 create date:2014/05/06 | first author:Kempson SA
- 97 Xlcaax-1 is localized to the basolateral membrane of kidney tubule and other polarized epithelia during *Xenopus* development. /pubmed/1537427 Cornish JA, Kloc M, Decker GL, Reddy BA, Etkin LD. Dev Biol. 1992 Mar;150(1):108-20. Dev Biol. 1992 PubMed citation PMID:1537427 pubmed 1537427 create date:1992/03/01 | first author:Cornish JA
- 98 Cadherin-6 is required for zebrafish nephrogenesis during early development. /pubmed/17294363 Kubota F, Murakami T, Mogi K, Yorifuji H. Int J Dev Biol. 2007;51(2):123-9. Int J Dev Biol. 2007 PubMed citation PMID:17294363 pubmed 17294363 create date:2007/02/13 | first author:Kubota F
- 99 The SLC34 family of sodium-dependent phosphate transporters. /pubmed/24352629 Wagner CA, Hernando N, Forster IC, Biber J. Pflugers Arch. 2014 Jan;466(1):139-53. doi: 10.1007/s00424-013-1418-6. Epub 2013 Dec 19. Review. Pflugers Arch. 2014 PubMed citation PMID:24352629 pubmed 24352629 create date:2013/12/20 | first author:Wagner CA
- 100 ABCC2/Abcc2: a multispecific transporter with dominant excretory functions. /pubmed/20082599 Jemnitz K, Heredi-Szabo K, Janossy J, Ioja E, Vereczkey L, Krajcsi P. Drug Metab Rev. 2010 Aug;42(3):402-36. doi: 10.3109/03602530903491741. Review. Drug Metab Rev. 2010 PubMed citation PMID:20082599 pubmed 20082599 create date:2010/01/20 | first author:Jemnitz K
- 101 OSTalpha-OSTbeta: a major basolateral bile acid and steroid transporter in human intestinal, renal, and biliary epithelia. /pubmed/16317684 Ballatori N, Christian WV, Lee JY, Dawson PA, Soroka CJ, Boyer JL, Madejczyk MS, Li N. Hepatology. 2005 Dec;42(6):1270-9. Hepatology. 2005 PubMed citation PMID:16317684 pubmed 16317684 create date:2005/12/01 | first author:Ballatori N
- 102 Hijacking solute carriers for proton-coupled drug transport. /pubmed/21186281 Anderson CM, Thwaites DT. Physiology (Bethesda). 2010 Dec;25(6):364-77. doi: 10.1152/physiol.00027.2010. Review. Physiology (Bethesda). 2010 PubMed citation PMID:21186281 pubmed 21186281 create date:2010/12/28 | first author:Anderson CM
- 103 Orphan transporter SLC6A18 is renal neutral amino acid transporter B0AT3. /pubmed/19478081 Singer D, Camargo SM, Huggel K, Romeo E, Danilczyk U, Kuba K, Chesnov S, Caron MG, Penninger JM, Verrey F. J Biol Chem. 2009 Jul 24;284(30):19953-60. doi: 10.1074/jbc.M109.011171. Epub 2009 May 28. J Biol Chem. 2009 PubMed citation PMID:19478081 | PMCID:PMC2740421 pubmed 19478081 create date:2009/05/30 | first author:Singer D
- 104 Proteomics profiling of nuclear proteins for kidney fibroblasts suggests hypoxia, meiosis, and cancer may meet in the nucleus. /pubmed/15942958 Shakib K, Norman JT, Fine LG, Brown LR, Godovac-Zimmermann J. Proteomics. 2005 Jul;5(11):2819-38. Proteomics. 2005 PubMed citation PMID:15942958 pubmed 15942958 create date:2005/06/09 | first author:Shakib K
- 105 Expression and functionality of the Na<sup>+</sup>/myo-inositol cotransporter SMIT2 in rabbit kidney. /pubmed/17306760 Lahjouji K, Aouameur R, Bissonnette P, Coady MJ, Bichet DG, Lapointe JY. Biochim Biophys Acta. 2007 May;1768(5):1154-9. Epub 2007 Jan 19. Biochim Biophys Acta. 2007 PubMed citation PMID:17306760 pubmed 17306760 create date:2007/02/20 | first author:Lahjouji K
- 106 Genetic polymorphisms in calcitonin receptor gene and risk for recurrent kidney calcium stone disease. /pubmed/24296906 Shakhssalim N, Basiri A, Houshmand M, Pakmanesh H, Golestan B, Azadvari M, Aryan H, Kashi AH. Urol Int. 2014;92(3):356-62. doi: 10.1159/000353348. Epub 2013 Nov 27. Urol Int. 2014 PubMed citation PMID:24296906 pubmed 24296906 create date:2013/12/04 | first author:Shakhssalim N
- 107 Insulin receptor-related receptor messenger ribonucleic acid: quantitative distribution and localization to subpopulations of epithelial cells in stomach and kidney. /pubmed/7649121 Mathi SK, Chan J, Watt VM. Endocrinology. 1995 Sep;136(9):4125-32. Endocrinology. 1995 PubMed citation PMID:7649121 pubmed 7649121 create date:1995/09/01 | first author:Mathi SK
- 108 Localization of Tamm-Horsfall glycoprotein in the normal rat kidney and the effect of adrenalectomy on its localization in the hamster and rat kidney. /pubmed/7130054 Sikri KL, Alexander DP, Foster CL. J Anat. 1982 Aug;135(Pt 1):29-45. J Anat. 1982 PubMed citation PMID:7130054 | PMCID:PMC1168126 pubmed 7130054 create date:1982/08/01 | first author:Sikri KL
- 109 Expression of the Na-K-2Cl cotransporter by macula densa and thick ascending limb cells of rat and rabbit nephron. /pubmed/8698854 Obermayer N, Kunchaparty S, Ellison DH, Bachmann S. J Clin Invest. 1996 Aug 1;98(3):635-40. J Clin Invest. 1996 PubMed citation PMID:8698854 | PMCID:PMC507472 pubmed 8698854 create date:1996/08/01 | first author:Obermayer N
- 110 Immunolocalization of calcitriol receptor, 24-hydroxylase cytochrome P-450, and calbindin D28k in human kidney. /pubmed/8160797 Kumar R, Schaefer J, Grande JP, Roche PC. Am J Physiol. 1994 Mar;266(3 Pt 2):F477-85. Am J Physiol. 1994 PubMed citation PMID:8160797 pubmed 8160797 create date:1994/03/01 | first author:Kumar R
- 111 Expression of the potassium channel ROMK in adult and fetal human kidney. /pubmed/15895241 Nishida S, Pantalone F, Grone HJ, Seyberth HW, Wegmann M. Histochem Cell Biol. 2005 Jun;123(6):553-9. Epub 2005 May 14. Histochem Cell Biol. 2005 PubMed citation PMID:15895241 pubmed 15895241 create date:2005/05/17 | first author:Nishida S

- 112 The sodium chloride cotransporter SLC12A3: new roles in sodium, potassium, and blood pressure regulation. /pubmed/24310820 Moes AD, van der Lubbe N, Zietse R, Loffing J, Hoorn EJ. Pflugers Arch. 2014 Jan;466(1):107-18. doi: 10.1007/s00424-013-1407-9. Epub 2013 Dec 6. Review. Pflugers Arch. 2014 PubMed citation PMID:24310820 pubmed 24310820 create date:2013/12/07 | first author:Moes AD
- 113 Expression of claudin-7 and -8 along the mouse nephron. /pubmed/14722018 Li WY, Huey CL, Yu AS. Am J Physiol Renal Physiol. 2004 Jun;286(6):F1063-71. Epub 2004 Jan 13. Am J Physiol Renal Physiol. 2004 PubMed citation PMID:14722018 pubmed 14722018 create date:2004/01/15 | first author:Li WY
- 114 Calcium-sensing receptor and calcium kidney stones. /pubmed/22107799 Vezzoli G, Terranegra A, Rainone F, Arcidiacono T, Cozzolino M, Aloia A, Dogliotti E, Cusi D, Soldati L. J Transl Med. 2011 Nov 22;9:201. doi: 10.1186/1479-5876-9-201. Review. J Transl Med. 2011 PubMed citation PMID:22107799 | PMCID:PMC3339356 pubmed 22107799 create date:2011/11/24 | first author:Vezzoli G
- 115 Cloning and expression of glycolipid transfer protein from bovine and porcine brain. /pubmed/10671554 Lin X, Mattjus P, Pike HM, Windebank AJ, Brown RE. J Biol Chem. 2000 Feb 18;275(7):5104-10. J Biol Chem. 2000 PubMed citation PMID:10671554 | PMCID:PMC2621014 pubmed 10671554 create date:2000/02/15 | first author:Lin X
- 116 Comparative analysis of AP-2 alpha and AP-2 beta gene expression during murine embryogenesis. /pubmed/8989526 Moser M, R ̃schoff J, Buettner R. Dev Dyn. 1997 Jan;208(1):115-24. Dev Dyn. 1997 PubMed citation PMID:8989526 pubmed 8989526 create date:1997/01/01 | first author:Moser M
- 117 New insights into regulated aquaporin-2 function. /pubmed/23852332 Fenton RA, Pedersen CN, Moeller HB. Curr Opin Nephrol Hypertens. 2013 Sep;22(5):551-8. doi: 10.1097/MNH.0b013e328364000d. Review. Curr Opin Nephrol Hypertens. 2013 PubMed citation PMID:23852332 pubmed 23852332 create date:2013/07/16 | first author:Fenton RA
- 118 Hepsin, a cell membrane-associated protease. Characterization, tissue distribution, and gene localization. /pubmed/1885621 Tsuji A, Torres-Rosado A, Arai T, Le Beau MM, Lemons RS, Chou SH, Kurachi K. J Biol Chem. 1991 Sep 5;266(25):16948-53. J Biol Chem. 1991 PubMed citation PMID:1885621 pubmed 1885621 create date:1991/09/05 | first author:Tsuji A
- 119 Molecular cloning and characterization of novel tissue-specific isoforms of the human vacuolar H(+)-ATPase C, G and d subunits, and their evaluation in autosomal recessive distal renal tubular acidosis. /pubmed/12384298 Smith AN, Borthwick KJ, Karet FE. Gene. 2002 Sep 4;297(1-2):169-77. Gene. 2002 PubMed citation PMID:12384298 pubmed 12384298 create date:2002/10/18 | first author:Smith AN
- 120 Parvalbumin: calcium and magnesium buffering in the distal nephron. /pubmed/23144069 Olinger E, Schwaller B, Loffing J, Gailly P, Devuyt O. Nephrol Dial Transplant. 2012 Nov;27(11):3988-94. doi: 10.1093/ndt/gfs457. Review. Nephrol Dial Transplant. 2012 PubMed citation PMID:23144069 pubmed 23144069 create date:2012/11/13 | first author:Olinger E
- 121 Effect of collecting duct-specific deletion of both Rh B Glycoprotein (RhbG) and Rh C Glycoprotein (Rhcg) on renal response to metabolic acidosis. /pubmed/24338819 Lee HW, Verlander JW, Handlogten ME, Han KH, Weiner ID. Am J Physiol Renal Physiol. 2014 Feb 15;306(4):F389-400. doi: 10.1152/ajprenal.00176.2013. Epub 2013 Dec 11. Am J Physiol Renal Physiol. 2014 PubMed citation PMID:24338819 | PMCID:PMC3920025 pubmed 24338819 create date:2013/12/18 | first author:Lee HW
- 122 AE4 is a DIDS-sensitive Cl(-)/HCO(-)(3) exchanger in the basolateral membrane of the renal CCD and the SMG duct. /pubmed/12225984 Ko SB, Luo X, Hager H, Rojek A, Choi JY, Licht C, Suzuki M, Muallem S, Nielsen S, Ishibashi K. Am J Physiol Cell Physiol. 2002 Oct;283(4):C1206-18. Am J Physiol Cell Physiol. 2002 PubMed citation PMID:12225984 pubmed 12225984 create date:2002/09/13 | first author:Ko SB
