# Supplementary material for: The Kidney Transcriptome and Proteome Defined by Transcriptomics and Antibody-Based Profiling
Source: PubMed Central journal article supplement (PMC4281243; doi:10.1371/journal.pone.0116125), 2014-12-31
Supplement: pone.0116125.s007.pdf [file pone.0116125.s007.pdf]

Table S5. GO analysis of the different nephron segment and collecting duct specific proteins/proteomes

| Segment         | Description top10 (biological process)                                        | GO Term    | Enrichment                             | Description top10 (molecular function)                              | GO Term           | Enrichment | Description top10 (cellular component) | GO Term    | Enrichment |
|-----------------|-------------------------------------------------------------------------------|------------|----------------------------------------|---------------------------------------------------------------------|-------------------|------------|----------------------------------------|------------|------------|
| Glomeruli       | regulation of microvillus assembly                                            | GO:0032534 | 1457.33                                | myo-inositol transmembrane transporter activity                     | GO:0005365        | 1457.33    | filtration diaphragm                   | GO:0036056 | 624.57     |
|                 | slit diaphragm assembly                                                       | GO:0036060 | 1457.33                                | myo-inositol:sodium symporter activity                              | GO:0005367        | 1457.33    | slit diaphragm                         | GO:0036057 | 624.57     |
|                 | filtration diaphragm assembly                                                 | GO:0036058 | 1457.33                                |                                                                     |                   |            | membrane raft                          | GO:0045121 | 22.54      |
|                 | branch elongation involved in ureteric bud branching                          | GO:0060681 | 1457.33                                |                                                                     |                   |            | cell-cell junction                     | GO:0005911 | 15.39      |
|                 | glomerular visceral epithelial cell development                               | GO:0072015 | 546.5                                  |                                                                     |                   |            | integral component of plasma membrane  | GO:0005887 | 8.38       |
|                 | glomerular epithelial cell development                                        | GO:0072310 | 485.78                                 |                                                                     |                   |            | plasma membrane                        | GO:0005886 | 3.38       |
|                 | excretion                                                                     | GO:0007588 | 66.24                                  |                                                                     |                   |            | integral component of membrane         | GO:0016021 | 3.02       |
|                 | epithelial cell development                                                   | GO:0002064 | 60.72                                  |                                                                     |                   |            | membrane part                          | GO:0044425 | 2.4        |
| Proximal tubule | urate transport                                                               | GO:0015747 | 149.47                                 | phosphoenolpyruvate carboxykinase activity                          | GO:0004611        | 149.47     | brush border membrane                  | GO:0031526 | 21.87      |
|                 | fructose catabolic process                                                    | GO:0006001 | 149.47                                 | phosphoenolpyruvate carboxykinase (GTP) activity                    | GO:0004613        | 149.47     | apical plasma membrane                 | GO:0016324 | 9.83       |
|                 | amino-acid betaine catabolic process                                          | GO:0006579 | 99.65                                  | betaine-homocysteine S-methyltransferase activity                   | GO:0047150        | 149.47     | basolateral plasma membrane            | GO:0016323 | 6.06       |
|                 | NADH oxidation                                                                | GO:0006116 | 99.65                                  | urate transmembrane transporter activity                            | GO:0015143        | 149.47     | cell projection membrane               | GO:0031253 | 5.34       |
|                 | quinolinate metabolic process                                                 | GO:0046874 | 74.74                                  | salt transmembrane transporter activity                             | GO:1901702        | 149.47     | mitochondrial matrix                   | GO:0005759 | 4.55       |
|                 | L-cystine transport                                                           | GO:0015811 | 74.74                                  | homocysteine S-methyltransferase activity                           | GO:0008898        | 99.65      | integral component of plasma membrane  | GO:0005887 | 3.73       |
|                 | pyridine-containing compound catabolic process                                | GO:0072526 | 74.74                                  | aminoacylase activity                                               | GO:0004046        | 89.68      | intracellular organelle lumen          | GO:0070013 | 3.22       |
|                 | response to methotrexate                                                      | GO:0031427 | 74.74                                  | glycine N-acyltransferase activity                                  | GO:0047961        | 74.74      | organelle lumen                        | GO:0043233 | 3.15       |
|                 | sulfur amino acid transport                                                   | GO:0000101 | 74.74                                  | L-cystine transmembrane transporter activity                        | GO:0015184        | 74.74      | membrane-enclosed lumen                | GO:0031974 | 3.12       |
|                 | amino-acid betaine biosynthetic process                                       | GO:0006578 | 64.06                                  | sodium-independent organic anion transmembrane transporter activity | GO:0015347        | 59.79      | mitochondrial part                     | GO:0044429 | 2.89       |
| Distal tubule   | regulation of G-protein activated inward rectifier potassium channel activity | GO:1900128 | 1943.11                                | sodium:chloride symporter activity                                  | GO:0015378        | 1943.11    | No GO enrichment found                 |            |            |
|                 | metanephric connecting tubule development                                     | GO:0072286 | 1943.11                                | cation:chloride symporter activity                                  | GO:0015377        | 485.78     |                                        |            |            |
|                 | connecting tubule development                                                 | GO:0072027 | 1943.11                                | anion:cation symporter activity                                     | GO:0015296        | 80.96      |                                        |            |            |
|                 | cellular urea homeostasis                                                     | GO:0097277 | 1943.11                                | chloride transmembrane transporter activity                         | GO:0015108        | 51.82      |                                        |            |            |
|                 | cellular creatinine homeostasis                                               | GO:0097276 | 1943.11                                | solute:cation symporter activity                                    | GO:0015294        | 47.98      |                                        |            |            |
|                 | cellular ammonia homeostasis                                                  | GO:0097275 | 1943.11                                | <b>substrate-specific transporter activity</b>                      | <b>GO:0022892</b> | 8.3        |                                        |            |            |
|                 | ammonia homeostasis                                                           | GO:0097272 | 1943.11                                |                                                                     |                   |            |                                        |            |            |
|                 | creatinine homeostasis                                                        | GO:0097273 | 1943.11                                |                                                                     |                   |            |                                        |            |            |
|                 | urea homeostasis                                                              | GO:0097274 | 1943.11                                |                                                                     |                   |            |                                        |            |            |
|                 | metanephric distal convoluted tubule development                              | GO:0072221 | 971.56                                 |                                                                     |                   |            |                                        |            |            |
| Collecting duct | basement membrane disassembly                                                 | GO:0034769 | 2186                                   | monovalent inorganic cation transmembrane transporter activity      | GO:0015077        | 20.18      | cytoplasmic vesicle membrane           | GO:0030659 | 18.17      |
|                 | monovalent inorganic cation transport                                         | GO:0015672 | 22.08                                  | inorganic cation transmembrane transporter activity                 | GO:0022890        | 13.92      | vesicle membrane                       | GO:0012506 | 17.63      |
|                 | transmembrane transport                                                       | GO:0055085 | 13                                     | substrate-specific transmembrane transporter activity               | GO:0022891        | 13.48      |                                        |            |            |
|                 | ion transport                                                                 | GO:0006811 | 8.82                                   | transmembrane transporter activity                                  | GO:0022857        | 12.36      |                                        |            |            |
|                 |                                                                               |            |                                        | <b>substrate-specific transporter activity</b>                      | <b>GO:0022892</b> | 11.66      |                                        |            |            |
|                 |                                                                               |            | ion transmembrane transporter activity | GO:0015075                                                          | 11.61             |            |                                        |            |            |
|                 |                                                                               |            | transporter activity                   | GO:0005215                                                          | 9.5               |            |                                        |            |            |

Only 1 overlap GO term among each nephron segments.
