# Supplementary material for: The Kidney Transcriptome and Proteome Defined by Transcriptomics and Antibody-Based Profiling
Source: PubMed Central journal article supplement (PMC4281243; doi:10.1371/journal.pone.0116125), 2014-12-31
Supplement: pone.0116125.s008.pdf [file pone.0116125.s008.pdf]

Table S6. GO analysis of 39 liver/kidney shared proteins

| Gene category                                            | Description top10 (biological process)           | GO Term           | Enrichment    | Description top10 (molecular function)                                                                                                                                                   | GO Term           | Enrichment    | Description top10 (cellular component)             | GO Term           | Enrichment   |
|----------------------------------------------------------|--------------------------------------------------|-------------------|---------------|------------------------------------------------------------------------------------------------------------------------------------------------------------------------------------------|-------------------|---------------|----------------------------------------------------|-------------------|--------------|
| Group enriched genes (shared only liver)<br>n=39         | amino-acid betaine catabolic process             | GO:0006579        | 298.92        | <b>betaine-homocysteine S-methyltransferase activity</b>                                                                                                                                 | <b>GO:0047150</b> | <b>448.38</b> | microbody                                          | GO:0042579        | 19.49        |
|                                                          | beta-alanine metabolic process                   | GO:0019482        | 298.92        | homocysteine S-methyltransferase activity                                                                                                                                                | GO:0008898        | 298.92        | peroxisome                                         | GO:0005777        | 19.29        |
|                                                          | proline catabolic process                        | GO:0006562        | 224.19        | arachidonic acid omega-hydroxylase activity                                                                                                                                              | GO:0052869        | 298.92        | organelle lumen                                    | GO:0043233        | 5.82         |
|                                                          | alanine catabolic process                        | GO:0006524        | 179.35        | <b>alkane 1-monoxygenase activity</b>                                                                                                                                                    | <b>GO:0018685</b> | <b>224.19</b> | intracellular organelle lumen                      | GO:0070013        | 5.63         |
|                                                          | alanine metabolic process                        | GO:0006522        | 179.35        | oxidoreductase activity, acting on paired donors, with incorporation or reduction of molecular oxygen, reduced iron-sulfur protein as one donor, and incorporation of one atom of oxygen | GO:0016713        | 128.11        | membrane-enclosed lumen                            | GO:0031974        | 5.35         |
|                                                          | pyruvate family amino acid catabolic process     | GO:0009080        | 179.35        | S-methyltransferase activity                                                                                                                                                             | GO:0008172        | 128.11        | cytoplasmic part                                   | GO:0044444        | 1.96         |
|                                                          | pyruvate family amino acid metabolic process     | GO:0009078        | 179.35        | butyrate-CoA ligase activity                                                                                                                                                             | GO:0047760        | 112.1         |                                                    |                   |              |
|                                                          | glyoxylate metabolic process                     | GO:0046487        | 112.1         | acid-thiol ligase activity                                                                                                                                                               | GO:0016878        | 67.26         |                                                    |                   |              |
|                                                          | proline metabolic process                        | GO:0006560        | 89.68         | phosphate ion transmembrane transporter activity                                                                                                                                         | GO:0015114        | 64.05         |                                                    |                   |              |
|                                                          | cellular glucuronidation                         | GO:0052695        | 84.07         | oxidoreductase activity, acting on the CH-NH group of donors                                                                                                                             | GO:0016645        | 53.81         |                                                    |                   |              |
| Group enriched genes (except shared only liver)<br>n=117 | <b>fructose catabolic process</b>                | <b>GO:0006001</b> | <b>158.97</b> | inward rectifier potassium channel activity                                                                                                                                              | GO:005242         | 22.71         | <b>brush border membrane</b>                       | <b>GO:0031526</b> | <b>15.51</b> |
|                                                          | NADH oxidation                                   | GO:0006116        | 105.98        | organic acid:sodium symporter activity                                                                                                                                                   | GO:0005343        | 17.03         | basolateral plasma membrane                        | GO:0016323        | 9.67         |
|                                                          | potassium ion homeostasis                        | GO:0055075        | 52.99         | solute:sodium symporter activity                                                                                                                                                         | GO:0015370        | 16.22         | <b>apical plasma membrane</b>                      | <b>GO:0016324</b> | <b>9.06</b>  |
|                                                          | renal water homeostasis                          | GO:0003091        | 52.99         | anion:cation symporter activity                                                                                                                                                          | GO:0015296        | 13.25         | cell projection part                               | GO:0044463        | 3.08         |
|                                                          | G1 to G0 transition                              | GO:0070314        | 45.42         | solute:cation symporter activity                                                                                                                                                         | GO:0015294        | 11.78         | plasma membrane part                               | GO:0044459        | 2.84         |
|                                                          | fat-soluble vitamin biosynthetic process         | GO:0042362        | 45.42         | sodium ion transmembrane transporter activity                                                                                                                                            | GO:0015081        | 11.54         | cell projection                                    | GO:0042995        | 2.79         |
|                                                          | spinal cord motor neuron cell fate specification | GO:0021520        | 45.42         | antiporter activity                                                                                                                                                                      | GO:0015297        | 10.78         | integral component of plasma membrane              | GO:0005887        | 2.74         |
|                                                          | cellular anion homeostasis                       | GO:0030002        | 43.36         | secondary active transmembrane transporter activity                                                                                                                                      | GO:0015291        | 10.26         | plasma membrane                                    | GO:0005886        | 2.07         |
|                                                          | fructose metabolic process                       | GO:0006000        | 43.36         | symporter activity                                                                                                                                                                       | GO:0015293        | 10.01         | integral component of membrane                     | GO:0016021        | 1.58         |
|                                                          | vitamin D metabolic process                      | GO:0042359        | 43.36         | organic anion transmembrane transporter activity                                                                                                                                         | GO:0008514        | 8.76          | membrane part                                      | GO:0044425        | 1.54         |
| kidney enriched<br>n=387                                 | urate transport                                  | GO:0015747        | 48.85         | arachidonic acid omega-hydroxylase activity                                                                                                                                              | GO:0052869        | 48.85         | vacuolar proton-transporting V-type ATPase complex | GO:0016471        | 21.71        |
|                                                          | <b>fructose catabolic process</b>                | <b>GO:0006001</b> | <b>48.85</b>  | phosphoenolpyruvate carboxykinase activity                                                                                                                                               | GO:0004611        | 48.85         | proton-transporting V-type ATPase complex          | GO:0033176        | 21.71        |
|                                                          | mesonephric duct formation                       | GO:0072181        | 48.85         | phosphoenolpyruvate carboxykinase (GTP) activity                                                                                                                                         | GO:0004613        | 48.85         | filtration diaphragm                               | GO:0036056        | 20.94        |
|                                                          | metanephric thick ascending limb development     | GO:0072233        | 48.85         | parathyroid hormone receptor activity                                                                                                                                                    | GO:0004991        | 48.85         | slit diaphragm                                     | GO:0036057        | 20.94        |
|                                                          | thick ascending limb development                 | GO:0072023        | 48.85         | <b>betaine-homocysteine S-methyltransferase activity</b>                                                                                                                                 | <b>GO:0047150</b> | <b>48.85</b>  | <b>brush border membrane</b>                       | <b>GO:0031526</b> | <b>11.91</b> |
|                                                          | nephric duct formation                           | GO:0072179        | 36.64         | urate transmembrane transporter activity                                                                                                                                                 | GO:0015143        | 48.85         | brush border                                       | GO:0005903        | 10.18        |
|                                                          | mesonephric tubule formation                     | GO:0072172        | 36.64         | salt transmembrane transporter activity                                                                                                                                                  | GO:1901702        | 48.85         | <b>apical plasma membrane</b>                      | <b>GO:0016324</b> | <b>7.71</b>  |
|                                                          | metanephric distal convoluted tubule development | GO:0072221        | 36.64         | oxidoreductase activity, acting on the CH-NH group of donors, flavin as acceptor                                                                                                         | GO:0046997        | 48.85         | basolateral plasma membrane                        | GO:0016323        | 7.26         |
|                                                          | distal convoluted tubule development             | GO:0072025        | 36.64         | <b>alkane 1-monoxygenase activity</b>                                                                                                                                                    | <b>GO:0018685</b> | <b>36.64</b>  | apical part of cell                                | GO:0045177        | 5.78         |
|                                                          | response to methotrexate                         | GO:0031427        | 36.64         | aminoacylase activity                                                                                                                                                                    | GO:0004046        | 29.31         | cell projection membrane                           | GO:0031253        | 3.49         |

Only 1 overlap GO term among each nephron segments.
