# Supplementary material for: The Kidney Transcriptome and Proteome Defined by Transcriptomics and Antibody-Based Profiling
Source: PLoS One. 2014 Dec 31;9(12):e116125. doi: 10.1371/journal.pone.0116125 (PMC4281243; doi:10.1371/journal.pone.0116125)
Supplement: S1 File — Kidney enhanced genes. (XLS) [file pone.0116125.s009.xls]

## Sheet: Supplementary file 2
File S1 – The kidney enhanced genes
Gene_name	Description	proteinclasses	signal peptide	transmembrane	antibody	category	group tissues	tissue-Highly tissue enriched score	Group enriched score	Enhanced score	Kidney mean fpkm	kidney_a.V5	kidney_b.V6	kidney_c.V23	kidney_d.V24	Max fpkm	max other	Mean fpkm	colon fpkm	kidney fpkm	liver fpkm	pancreas fpkm	lung fpkm	prostate fpkm	brain fpkm	stomach fpkm	spleen fpkm	lymphnode fpkm	appendix fpkm	smallintestine fpkm	adrenal fpkm	duodenum fpkm	fat fpkm	cervix fpkm	placenta fpkm	testis fpkm	gallbladder fpkm	urinarybladder fpkm	thyroid fpkm	esophagus fpkm	heart fpkm	skin fpkm	ovary fpkm	bonemarrow fpkm	salivarygland fpkm	Ensg_id	ncbi_gene_summary	uniprot_id
SLC13A1	solute carrier family 13 (sodium/sulfate symporters), member 1	Transporters		YES	HPA053615	Enhanced		4.25583	0	19.3561	72.83	81.6076	115.862	13.9082	79.9422	72.83	17.113	3.76263	0.266	72.83	0	0.026	0	0.015	0.037	0.018	0.004	0.026	0	17.113	0	0.112	0.026	0.023	0	0.061	11.025	0	0	0	0.009	0	0	0	0	ENSG00000081800		Q9BZW2,F8WEH1,F8WEM4,F5GYP1	ENSG00000081800
RP11-536G4.1	Uncharacterized protein				NA	Enhanced		4.56808	0	18.6253	1.946	0.51045	2.77654	2.32594	2.17103	1.946	0.426	0.104481	0	1.946	0	0	0	0	0	0.171	0	0	0	0	0.426	0	0	0	0	0.112	0	0	0	0	0.166	0	0	0	0	ENSG00000258292		F8VSE3	ENSG00000258292
PDZK1	PDZ domain containing 1				HPA005755,CAB008971,HPA006155	Enhanced		3.93946	0	15.9576	390.353	450.458	495.177	169.894	445.884	390.353	99.088	24.4619	4.098	390.353	68.602	6.508	0.313	0.203	0.682	2.346	0.433	0.313	0.188	99.088	3.008	57.893	0.278	0.562	0.357	0.574	23.059	0.178	0.278	0.042	0.113	0.402	0.385	0.142	0.074	ENSG00000174827	This gene encodes a PDZ domain-containing scaffolding protein. PDZ domain-containing molecules bind to and mediate the subcellular localization of target proteins. The encoded protein mediates the localization of cell surface proteins and plays a critical role in cholesterol metabolism by regulating the HDL receptor, scavenger receptor class B type 1. Single nucleotide polymorphisms in this gene …	Q5T2W1,Q5T2W1,Q5T2W1,E7EU02	ENSG00000174827
BBOX1	butyrobetaine (gamma), 2-oxoglutarate dioxygenase 1	Enzymes			HPA027823,HPA007600	Enhanced		3.66384	0	15.7856	255.604	324.233	315.166	71.817	311.201	255.604	69.764	16.1922	0.648	255.604	69.764	0.484	0.253	0.585	18.156	0.18	0.162	0.175	0	0.035	0	0	1.756	0.16	0.412	0.195	11.913	0.147	12.934	18.091	0.251	45.206	0.019	0	0.06	ENSG00000129151	This gene encodes gamma butyrobetaine hydroxylase which catalyzes the formation of L-carnitine from gamma-butyrobetaine, the last step in the L-carnitine biosynthetic pathway. Carnitine is essential for the transport of activated fatty acids across the mitochondrial membrane during mitochondrial beta-oxidation. [provided by RefSeq, Jul 2008]	E9PKC9,O75936,O75936,O75936,O75936	ENSG00000129151
FOXI1	forkhead box I1	Transcription factors			NA	Enhanced		2.0681	0	15.7061	19.283	17.0704	21.628	22.7568	15.6767	19.283	9.324	1.22774	0.049	19.283	0	0.131	0.019	3.782	0	0.092	0.017	0.02	0	0.066	0	0	0.049	0	0.013	0.164	0	0.1	0	0.018	0	0	0	0.022	9.324	ENSG00000168269	This gene belongs to the forkhead family of transcription factors which is characterized by a distinct forkhead domain. The Highly tissue enriched function of this gene has not yet been determined; however, it is possible that this gene plays an important role in the development of the cochlea and vestibulum, as well as embryogenesis. Mutations in this gene may be associated with the common cavit…	Q12951,Q12951	ENSG00000168269
PTH2R	parathyroid hormone 2 receptor	GPCRs excl olfactory receptors	YES	YES	HPA010655	Enhanced		4.91991	0	15.139	23.281	24.7869	29.1941	16.3405	22.8041	23.281	4.732	1.53781	0.135	23.281	0.772	0.172	0.094	0.311	1.488	0.314	0.117	0.172	0.112	0.096	0.425	1.03	1.521	0.689	1.403	0.865	0.648	0.046	0.015	0.077	0.021	0.027	0.033	4.732	2.925	ENSG00000144407	The protein encoded by this gene is a member of the G-protein coupled receptor family 2. This protein is a receptor for parathyroid hormone (PTH). This receptor is more selective in ligand recognition and has a more Highly tissue enriched tissue distribution compared to parathyroid hormone receptor 1 (PTHR1). It is activated only by PTH and not by parathyroid hormone-like hormone (PTHLH) and is p…	P49190,	ENSG00000144407
DMRT2	doublesex and mab-3 related transcription factor 2	Transcription factors		YES	HPA029297	Enhanced		3.74426	0	15.0869	16.134	17.0531	12.8463	21.9259	12.7115	16.134	4.309	1.06941	0.952	16.134	0.032	0	2.36	0.44	1.436	0	0	0.361	0.146	0	0.172	0	4.309	0	0.25	0.63	0.013	0.102	0.059	0.314	0.128	0.169	0.015	0	0.852	ENSG00000173253	The protein encoded by this gene belongs to the DMRT gene family, sharing a DM DNA-binding domain with Drosophila 'doublesex' (dsx) and C. elegans mab3, genes involved in sex determination in these organisms. Also, this gene is located in a region of the human genome (chromosome 9p24.3) associated with gonadal dysgenesis and XY sex reversal. Hence this gene is one of the candidates for sex-determ…	Q9Y5R5,Q9Y5R5,Q9Y5R5,Q9Y5R5,Q9Y5R5,Q9Y5R5	ENSG00000173253
AGMAT	agmatine ureohydrolase (agmatinase)	Enzymes			HPA026443,HPA028321	Enhanced		3.12206	0	14.8813	130.215	167.012	150.687	48.2871	154.873	130.215	41.708	8.75026	11.087	130.215	41.708	0.097	0.121	0.385	1.244	2.48	1.687	4.122	3.565	12.724	0.713	17.36	0.332	0.469	0.171	0.696	0.604	1.214	0.54	0.178	0.066	0.066	0.082	0.314	4.017	ENSG00000116771		Q9BSE5	ENSG00000116771
SLCO4C1	solute carrier organic anion transporter family, member 4C1	Transporters		YES	HPA036516	Enhanced		4.89271	0	14.5082	33.975	44.4876	39.9286	16.3033	35.1807	33.975	6.944	2.34178	1.314	33.975	3.874	0.178	6.944	0.039	0.143	0.56	0.701	0.193	0.396	0.829	0.779	1.552	0.145	0.031	0.089	0.749	2.458	0.264	1.821	0.195	0.214	0.175	0.016	4.287	1.307	ENSG00000173930	SLCO4C1 belongs to the organic anion transporter (OATP) family. OATPs are involved in the membrane transport of bile acids, conjugated steroids, thyroid hormone, eicosanoids, peptides, and numerous drugs in many tissues (Mikkaichi et al., 2004 [PubMed 14993604]).[supplied by OMIM, Mar 2008]	Q6ZQN7	ENSG00000173930
PTGER1	prostaglandin E receptor 1 (subtype EP1), 42kDa	Transporters,GPCRs excl olfactory receptors		YES	NA	Enhanced		2.80292	0	14.4209	5.191	6.91518	2.00122	8.24789	3.60119	5.191	1.852	0.359963	0.817	5.191	0.053	0.045	0.373	0.044	0	0.553	1.852	0	0.092	0.135	0.117	0.101	0.106	0.065	0.024	0.04	0.02	0.059	0.01	0	0	0	0	0	0.022	ENSG00000160951	The protein encoded by this gene is a member of the G protein-coupled receptor family. This protein is one of four receptors identified for prostaglandin E2 (PGE2). Through a phosphatidylinositol-calcium second messenger system, G-Q proteins mediate this receptor's activity. Knockout studies in mice suggested a role of this receptor in mediating algesia and in regulation of blood pressure. Studie…	P34995	ENSG00000160951
CASR	calcium-sensing receptor	Transporters,GPCRs excl olfactory receptors	YES	YES	HPA039686	Enhanced		3.79328	0	14.2821	21.102	21.9809	14.9555	33.5322	13.9412	21.102	5.563	1.47752	0.288	21.102	0.183	5.199	0.012	0.134	0.021	3.839	0.133	0.115	0.237	0.727	0.064	0.878	0.111	0.025	0.004	0.129	5.563	0.185	0.107	0.007	0.006	0.096	0.712	0.016	0	ENSG00000036828	The protein encoded by this gene is a G protein-coupled receptor that is expressed in the parathyroid hormone (PTH)-producing chief cells of the parathyroid gland, and the cells lining the kidney tubule. It senses small changes in circulating calcium concentration and couples this information to intracellular signaling pathways that modify PTH secretion or renal cation handling, thus this protein…	P41180,E7ENE0,P41180	ENSG00000036828
EGF	epidermal growth factor		YES	YES	CAB017843	Enhanced		1.9336	0	14.0024	89.957	105.776	57.7116	136.889	59.4506	89.957	46.523	6.42441	1.511	89.957	0.019	46.523	0.705	2.96	1.075	0.507	0.238	0.315	0.735	1.163	0.01	0.24	0.107	0.443	0.122	0.508	1.41	0.314	4.363	0.881	2.671	0.95	0.293	0.375	15.064	ENSG00000138798	This gene encodes a member of the epidermal growth factor superfamily. The encoded protein is synthesized as a large precursor molecule that is proteolytically cleaved to generate the 53-amino acid epidermal growth factor peptide. This protein acts a potent mitogenic factor that plays an important role in the growth, proliferation and differentiation of numerous cell types. This protein acts by b…	P01133,P01133,E7EVD2	ENSG00000138798
OGDHL	oxoglutarate dehydrogenase-like				HPA052497	Enhanced		3.02477	0	13.6674	134.705	156.399	143.833	79.952	158.637	134.705	44.534	9.85593	0.727	134.705	44.534	2.769	0.054	1.955	13.755	1.131	0.516	0.228	0.345	0.93	12.607	0.835	0.218	3.248	0.147	2.947	0.566	1.571	21.396	0.245	4.8	0.068	1.8	0.017	13.996	ENSG00000197444		Q9ULD0,Q9ULD0,Q9ULD0	ENSG00000197444
ESRRB	estrogen-related receptor beta	Nuclear receptors,Transcription factors			NA	Enhanced		2.32509	0	13.6528	8.933	10.868	2.08543	18.1656	4.61117	8.933	3.842	0.654296	0.104	8.933	0.017	0.089	0.093	0.366	0.083	1	0.216	0.098	0.218	0.055	0.124	0.053	0.139	0.042	0.099	1.659	0.027	0.118	0.074	0.099	3.842	0.007	0	0.073	0.038	ENSG00000119715	This gene encodes a protein with similarity to the estrogen receptor. Its function is unknown; however, a similar protein in mouse plays an essential role in placental development. [provided by RefSeq, Jul 2008]	E7EWD9,O95718,O95718,O95718,O95718,O95718	ENSG00000119715
KLHDC7A	kelch domain containing 7A				HPA056616	Enhanced		3.61872	0	13.343	22.693	26.3371	22.5579	20.1601	21.717	22.693	6.271	1.70074	1.171	22.693	2.44	1.555	0.992	0.412	0.041	4.447	0.007	0.01	0.051	0.288	0.007	0.342	0.776	0.093	0.012	0.242	1.125	6.271	1.558	0.363	0.033	0.008	0.006	0	0.977	ENSG00000179023		Q5VTJ3	ENSG00000179023
HECW1	HECT, C2 and WW domain containing E3 ubiquitin protein ligase 1				HPA007609,HPA007593	Enhanced		3.17527	0	13.1057	20.925	24.8457	24.0434	5.99403	28.8149	20.925	6.59	1.59663	0.516	20.925	0.134	0	0.112	1.982	6.59	0.556	0.104	0.14	0.305	0.487	0.265	0.045	0.096	0.587	0.313	4.12	2.4	1.432	0.526	0.872	0.007	0.073	0.473	0.023	0.026	ENSG00000002746		Q76N89,B4DH42,	ENSG00000002746
PDZK1IP1	PDZK1 interacting protein 1		YES	YES	HPA014907	Enhanced		3.99846	0	12.7188	751.495	1085.39	891.749	206.906	821.935	751.495	187.946	59.0853	37.54	751.495	1.5	46.051	34.018	12.194	0.513	43.839	0.851	0.313	21.735	23.564	4.207	17.792	1.578	15.606	5.752	2.337	187.946	37.509	0.299	97.807	0.337	85.572	0.443	25.907	138.598	ENSG00000162366		Q13113,Q13113	ENSG00000162366
PCSK1N	proprotein convertase subtilisin/kexin type 1 inhibitor		YES		HPA003925	Enhanced		2.64856	0	12.6172	101.445	157.639	101.786	40.9785	105.378	101.445	38.302	8.04019	10.259	101.445	0	6.486	0.728	2.661	38.302	19.009	0.221	0.075	0.437	4.598	16.873	5.094	2.752	2.68	0.303	2.837	0.301	0	0.25	0	0.753	0.542	0.134	0.095	0.25	ENSG00000102109	Members of the subtilisin-like proprotein convertase family process latent precursor proteins into their biologically active products. The protein encoded by this gene functions as an inhibitor of prohormone convertase 1, which regulates the proteolytic cleavage of neuroendocrine peptide precursors. [provided by RefSeq, Nov 2012]	Q9UHG2	ENSG00000102109
SCNN1G	sodium channel, non-voltage-gated 1, gamma subunit	Transporters		YES	NA	Enhanced		3.21508	0	12.5265	42.05	49.6235	22.3222	53.6593	42.5931	42.05	13.079	3.35689	7.103	42.05	0	1.134	5.393	0.976	0.11	3.319	0.049	0.024	0.053	0.023	0.083	0	0.488	1.5	0.415	0.056	0.018	2.07	5.055	5.857	0.006	1.743	0.032	0	13.079	ENSG00000166828	Nonvoltage-gated, amiloride-sensitive, sodium channels control fluid and electrolyte transport across epithelia in many organs. These channels are heteromeric complexes consisting of 3 subunits: alpha, beta, and gamma. This gene encodes the gamma subunit, and mutations in this gene have been associated with Liddle syndrome. [provided by RefSeq, Apr 2009]	P51170	ENSG00000166828
TRPM3	transient receptor potential cation channel, subfamily M, member 3	Transporters,Voltage-gated ion channels		YES	NA	Enhanced		4.16973	0	12.4162	13.61	16.058	16.7149	6.78027	14.8856	13.61	3.264	1.09615	0.197	13.61	0.12	0.419	0.079	0.546	2.706	0.505	0.181	0.059	0.029	0.042	0.757	1.107	0.278	0.855	0.185	3.264	0.409	0.156	0.826	0.101	0.402	0.017	2.551	0.003	0.192	ENSG00000083067	The product of this gene belongs to the family of transient receptor potential (TRP) channels. TRP channels are cation-selective channels important for cellular calcium signaling and homeostasis. The protein encoded by this gene mediates calcium entry, and this entry is potentiated by calcium store depletion. Alternatively spliced transcript variants encoding different isoforms have been identifi…	Q9HCF6,Q9HCF6,Q9HCF6,G5E9G1,A2A3F3,E9PBI7,A2A3F0,A2A3F4,Q504Y1,Q4VXD4,Q9HCF6,Q4VXD1,Q9HCF6,E9PBI7,A2A3F4,G5E9G1	ENSG00000083067
OTOGL	otogelin-like		YES		HPA040364	Enhanced		4.08156	0	12.3626	6.706	15.599	3.73803	0.97221	6.51514	6.706	1.643	0.542444	0.232	6.706	0.014	0.309	0.183	0.167	0.878	0.052	0.12	0.399	0.114	0.14	0.35	0.045	0.201	0.355	0.95	0.315	0.199	0.589	0.106	0.271	1.643	0.118	0.05	0.007	0.133	ENSG00000165899	The protein encoded by this gene belongs to the otogelin family. This gene is expressed in the inner ear of vertebrates with the highest level of expression seen at the embryonic stage and lowest in adult. Knockdown studies in zebrafish suggest that this gene is essential for normal inner ear function. Mutations in this gene are associated with autosomal recessive deafness. [provided by RefSeq, D…	F8W0C3,,E2QRK2,,H0YIL4,Q3ZCN5	ENSG00000165899
SLC3A1	solute carrier family 3, member 1	Transporters	YES	YES	HPA038360	Enhanced		2.83663	0	12.3203	314.097	469.292	376.428	111.967	298.702	314.097	110.729	25.4943	17.698	314.097	4.859	89.402	0.183	1.688	0.523	0.628	0.358	0.224	1.138	110.729	0.321	91.316	0.373	1.744	0.174	1.204	49.976	0.12	0.239	0.174	0.168	0.305	0.464	0.109	0.131	ENSG00000138079	This gene encodes a type II membrane glycoprotein which is one of the components of the renal amino acid transporter which transports neutral and basic amino acids in the renal tubule and intestinal tract. Mutations and deletions in this gene are associated with cystinuria. Alternatively spliced transcript variants have been described, but their biological validity has not been determined. [provi…	Q4J6B8,C9JBK3,B8ZZP2,E9PC38,Q07837,B8ZZK1,Q4J6B6,Q4J6B5,E7ENC4	ENSG00000138079
DEFB1	defensin, beta 1	Transporters,Plasma proteins	YES		NA	Enhanced		1.91125	0	11.6553	679.101	790.262	603.07	650.024	673.048	679.101	355.318	58.2653	22.262	679.101	126.485	131.288	3.765	13.961	0.427	14.284	0	0.07	2.698	4.731	0.424	7.722	2.845	21.859	3.728	0.142	47.211	3.642	0.178	47.54	0.128	73.187	0.118	10.048	355.318	ENSG00000164825	Defensins form a family of microbicidal and cytotoxic peptides made by neutrophils. Members of the defensin family are highly similar in protein sequence. This gene encodes defensin, beta 1, an antimicrobial peptide implicated in the resistance of epithelial surfaces to microbial colonization. This gene maps in close proximity to defensin family member, defensin, alpha 1 and has been implicated i…	P60022	ENSG00000164825
HOGA1	4-hydroxy-2-oxoglutarate aldolase 1	Enzymes			HPA039466	Enhanced		2.158	0	11.3531	46.589	53.3684	41.9935	29.0039	61.9918	46.589	21.589	4.10363	0.106	46.589	21.589	7.735	0.585	1.044	4.423	0.075	0.183	0.221	0.068	0.062	5.084	0.036	5.282	0.307	0.095	0.627	1.805	0.251	1.677	0.709	10.937	0.456	0.075	0.007	0.77	ENSG00000241935	The authors of PMID:20797690 cloned this gene while searching for genes in a region of chromosome 10 linked to primary hyperoxalurea type III. They noted that even though the encoded protein has been described as a mitochondrial dihydrodipicolinate synthase-like enzyme, it shares little homology with E. coli dihydrodipicolinate synthase (Dhdps), particularly in the putative substrate-binding regi…	Q86XE5,Q86XE5,	ENSG00000241935
WDR72	WD repeat domain 72				NA	Enhanced		1.45951	0	11.1639	77.719	72.3466	121.235	33.0998	84.1935	77.719	53.25	6.96163	0.768	77.719	19.136	1.647	0.625	0.096	0.113	0.556	0.009	0.025	0.181	1.002	0.023	3.012	0.136	1.473	0.199	0.643	5.087	5.62	53.25	0.46	0.057	1.989	0.132	0	14.006	ENSG00000166415	This gene encodes a protein with seven WD40 domains. Mutations in this gene have been associated with autosomal recessive hypomaturation amelogenesis imperfect type IIA3. [provided by RefSeq, Aug 2011]	Q3MJ13,H0YLX4,Q3MJ13,H0YKE0,H0YN02	ENSG00000166415
TAL2	T-cell acute lymphocytic leukemia 2	Transcription factors			HPA030886	Enhanced		3.64427	0	11.0961	1.844	2.9478	1.327	1.81999	1.28011	1.844	0.506	0.166185	0.077	1.844	0.052	0	0	0.123	0.506	0	0.236	0.196	0	0.061	0.087	0	0	0.061	0.142	0.297	0.073	0.105	0.131	0.099	0.085	0.181	0.131	0	0	ENSG00000186051	This intronless gene encodes a helix-loop-helix protein. Translocations between this gene on chromosome 9 and the T-cell receptor beta-chain locus on chromosome 7 have been associated with activation of the T-cell acute lymphocytic leukemia 2 gene and T-cell acute lymphoblastic leukemia. [provided by RefSeq, Mar 2009]	Q16559	ENSG00000186051
UGT3A1	UDP glycosyltransferase 3 family, polypeptide A1	Enzymes	YES	YES	HPA056290	Enhanced		1.14356	0	10.9248	36.651	45.2731	39.3288	14.8674	47.1343	36.651	32.05	3.35485	0.075	36.651	32.05	0	0.005	0.166	0.014	0.04	0	0.022	0	6.25	0.063	8.862	0.112	0.037	0.008	5.807	0.017	0.021	0	0.117	0	0.015	0	0	0.249	ENSG00000145626		Q6NUS8,D6RHV6,B7Z8Q8,E9PD17,G5E961	ENSG00000145626
NPR3	natriuretic peptide receptor C/guanylate cyclase C		YES	YES	HPA031065	Enhanced		3.78691	0	10.9183	91.291	122.825	85.09	32.3495	124.898	91.291	24.107	8.3613	1.251	91.291	3.39	0.557	12.208	8.909	0.659	0.431	6.277	0.458	0.615	0.779	2.771	0.587	24.107	3.305	9.03	1.42	4.785	2.105	14.611	6.017	23.953	1.721	1.285	2.499	0.734	ENSG00000113389	This gene encodes one of three natriuretic peptide receptors. Natriutetic peptides are small peptides which regulate blood volume and pressure, pulmonary hypertension, and cardiac function as well as some metabolic and growth processes. The product of this gene encodes a natriuretic peptide receptor responsible for clearing circulating and extracellular natriuretic peptides through endocytosis of…	C9JK69,P17342,,D6RDL8,P17342,E7EPG9	ENSG00000113389
AC022431.2	Uncharacterized protein				HPA047861	Enhanced		3.36422	0	10.8823	1.561	1.32665	1.75234	1.39587	1.76902	1.561	0.464	0.143444	0.078	1.561	0	0	0.134	0	0	0	0.117	0.189	0.07	0.426	0	0.464	0.051	0	0.023	0.07	0.051	0	0.179	0.229	0	0.179	0.052	0	0	ENSG00000225940		F2Z3F1	ENSG00000225940
RBP5	retinol binding protein 5, cellular				HPA038723	Enhanced		1.56753	0	10.8411	315.051	394.291	364.426	136.382	365.106	315.051	200.985	29.0609	10.348	315.051	200.985	1.922	5.178	5.781	0.461	8.844	71.036	52.96	27.531	10.462	8.663	10.221	3.302	8.91	0.593	4.101	10.319	8.643	2.531	3.424	0.839	2.966	3.583	1.981	4.008	ENSG00000139194		P82980,,F5H2Q2	ENSG00000139194
SUCNR1	succinate receptor 1	GPCRs excl olfactory receptors		YES	CAB022745	Enhanced		3.01106	0	10.6537	36.765	45.9468	49.3848	11.2264	40.5013	36.765	12.21	3.45093	0.806	36.765	2.811	0.088	2.145	0.042	0.601	12.21	5.873	1.863	1.549	1.2	0.731	1.011	4.291	0.109	0.261	0.141	0.654	1.262	11.039	0.295	0.671	0.522	0.112	5.703	0.42	ENSG00000198829	This gene encodes a G-protein-coupled receptor for succinate, an intermediate molecule of the citric acid cycle. It is involved in the promotion of hematopoietic progenitor cell development, and it has a potential role in renovascular hypertension which has known correlations to renal failure, diabetes and atherosclerosis. [provided by RefSeq, Oct 2009]	Q9BXA5	ENSG00000198829
ENPP6	ectonucleotide pyrophosphatase/phosphodiesterase 6	Enzymes	YES		HPA042740	Enhanced		1.67189	0	10.4759	24.545	35.0878	28.8349	4.70037	29.5569	24.545	14.681	2.343	1.015	24.545	0.039	0.014	0.405	1.684	4.895	1.134	1.021	1.087	1.539	2.685	0.468	1.507	0.181	0.036	0.046	3.091	0.628	0.709	0.054	1.244	0.196	0.045	14.681	0.017	0.295	ENSG00000164303		Q6UWR7,D6R9P1	ENSG00000164303
KCNJ15	potassium inwardly-rectifying channel, subfamily J, member 15	Voltage-gated ion channels		YES	HPA016702	Enhanced		1.72678	0	10.1405	213.257	305.992	177.539	78.8599	290.639	213.257	123.5	21.0303	0.733	213.257	1.505	32.259	36.866	1.495	0.303	35.216	5.714	0.889	17.265	0.471	0.801	1.47	0.948	1.101	3.114	1.491	31.89	23.852	123.5	6.899	0.323	0.691	0.182	6.421	19.161	ENSG00000157551	Potassium channels are present in most mammalian cells, where they participate in a wide range of physiologic responses. The protein encoded by this gene is an integral membrane protein and inward-rectifier type potassium channel. The encoded protein has a greater tendency to allow potassium to flow into a cell rather than out of a cell. Three transcript variants encoding the same protein have be…	F8VW46,F8VX74,F8VX74,F8VX74,F8VX74,F8VX74,F8VX74,A8MTZ5,A8MVK1,Q99712,C9JTX1,,Q99712,Q99712,E7EPG3,Q99712,A8MVK1,E7EWV2,Q99712	ENSG00000157551
ALX1	ALX homeobox 1	Transcription factors			HPA001598,HPA018905	Enhanced		2.2918	0	10.1128	2.796	1.85034	0.81241	7.70542	0.81523	2.796	1.22	0.276481	0.01	2.796	0	0.044	0.08	0.063	0.016	0.029	0	0.015	0	0.064	0.029	0	0.177	0.636	0.101	0.638	0.016	0.305	0.021	0.02	0.026	1.22	1.15	0.009	0	ENSG00000180318	The Highly tissue enriched function of this gene has yet to be determined in humans; however, in rodents, it is necessary for survival of the forebrain mesenchyme and may also be involved in development of the cervix. Mutations in the mouse gene lead to neural tube defects such as acrania and meroanencephaly. [provided by RefSeq, Jul 2008]	Q15699	ENSG00000180318
CLDN2	claudin 2			YES	CAB002609	Enhanced		1.04473	0	9.84042	107.359	146.739	146.847	32.6014	103.248	107.359	102.762	10.91	4.814	107.359	22.747	0.552	0.822	0.11	0.09	9.416	0.019	0.043	2.194	21.667	2.383	17.747	0.703	0.29	0.085	0.02	102.762	0.013	0.342	0.117	0.027	0.15	0.029	0.039	0.03	ENSG00000165376	This gene product belongs to the claudin protein family whose members have been identified as major integral membrane proteins localized exclusively at tight junctions. Claudins are expressed in an organ-Highly tissue enriched manner and regulate tissue-Highly tissue enriched physiologic properties of tight junctions. This protein is expressed in the intestine. Alternatively spliced transcript va…	P57739,P57739,P57739	ENSG00000165376
KCNH6	potassium voltage-gated channel, subfamily H (eag-related), member 6	Voltage-gated ion channels		YES	CAB022674	Enhanced		1.71177	0	9.73713	7.186	13.4899	6.72597	0.66302	7.86437	7.186	4.198	0.738	0.336	7.186	0.038	0.618	0.221	3.667	0.15	0.886	0.017	0	0	4.198	0.2	1.628	0.036	0	0.064	0.528	0.013	0.013	0.051	0.022	0	0.049	0	0.005	0	ENSG00000173826	Voltage-gated potassium (Kv) channels represent the most complex class of voltage-gated ion channels from both functional and structural standpoints. Their diverse functions include regulating neurotransmitter release, heart rate, insulin secretion, neuronal excitability, epithelial electrolyte transport, smooth muscle contraction, and cell volume. This gene encodes a member of the potassium chan…	,,,Q9H252,,Q9H252	ENSG00000173826
SLC16A4	solute carrier family 16, member 4			YES	HPA046986	Enhanced		3.43734	0	9.69607	109.414	139.288	143.923	36.3201	118.123	109.414	31.831	11.2844	2.765	109.414	12.561	0.269	10.837	3.74	3.45	1.766	2.919	3.74	6.209	13.975	3.458	9.391	2.347	2.953	31.831	8.01	20.45	8.859	11.614	4.39	3.254	0.932	22.53	0.279	2.735	ENSG00000168679		O15374,G3V175,Q8WU09,E9PKZ1,E9PRV1,E9PKZ1,H0YEG4,B4DJ67,E7EPY8	ENSG00000168679
CRYBB3	crystallin, beta B3				HPA045293	Enhanced		4.97475	0	9.62192	1.97	1.13134	1.61764	0.94951	4.18033	1.97	0.396	0.204741	0.195	1.97	0.136	0	0.151	0.231	0	0.328	0.072	0	0.252	0.396	0.166	0.157	0.143	0.092	0.084	0.111	0.182	0	0.334	0.154	0.044	0.07	0.041	0	0.219	ENSG00000100053	Crystallins are separated into two classes: taxon-Highly tissue enriched, or enzyme, and ubiquitous. The latter class constitutes the major proteins of vertebrate eye lens and maintains the transparency and refractive index of the lens. Since lens central fiber cells lose their nuclei during development, these crystallins are made and then retained throughout life, making them extremely stable pr…	P26998,B1AHR5	ENSG00000100053
GLTPD2	glycolipid transfer protein domain containing 2		YES		NA	Enhanced		1.02241	0	9.615	12.549	17.6768	12.8882	4.24931	15.3827	12.549	12.274	1.30515	0.674	12.549	12.274	0	0.283	0.267	0.451	0.425	0.549	0	0.184	2.324	0	4.445	0.246	0.093	0.015	0.031	0	0.046	0.012	0.034	0.023	0.146	0	0.062	0.106	ENSG00000182327		A6NH11	ENSG00000182327
AC104532.2					NA	Enhanced		1.34744	0	9.59753	1.21	2.58965	1.14165	5e-05	1.10929	1.21	0.898	0.126074	0.001	1.21	0	0	0.494	0	0	0.748	0	0	0	0	0	0	0.898	0	0	0	0	0	0	0	0	0	0	0.053	0	ENSG00000267314			ENSG00000267314
WNK4	WNK lysine deficient protein kinase 4	Kinases,Enzymes			HPA016500	Enhanced		1.98888	0	9.57281	23.252	21.3043	10.5846	43.1369	17.9818	23.252	11.691	2.42896	11.691	23.252	0.071	0.333	0.226	11.538	0.31	2.316	0.034	0.065	1.399	3.175	0.087	2.463	0.161	0.276	0.087	0.429	0.138	0.056	0.037	3.805	0.165	0.15	3.13	0.048	0.14	ENSG00000126562	This gene encodes a member of the WNK family of serine-threonine protein kinases. The kinase is part of the tight junction complex in kidney cells, and regulates the balance between NaCl reabsorption and K(+) secretion. The kinase regulates the activities of several types of ion channels, cotransporters, and exchangers involved in electrolyte flux in epithelial cells. Mutations in this gene resul…	Q96J92,,	ENSG00000126562
AC026703.1				YES	HPA036291	Enhanced		2.24888	0	9.38933	34.752	39.1778	33.1288	20.332	46.369	34.752	15.453	3.70122	0.506	34.752	2.244	0.242	6.985	5.603	0.247	0.27	2.852	0.236	0.1	0.118	2.227	0.24	15.453	1.549	2.496	0.502	2.172	0.392	5.037	1.743	10.055	2.106	0.453	0.999	0.354	ENSG00000181495			ENSG00000181495
AC009336.1	Uncharacterized protein; cDNA FLJ34815 fis, clone NT2NE2007786				HPA044018	Enhanced		2.16491	0	9.2816	4.109	5.19888	3.61496	4.08832	3.53353	4.109	1.898	0.442704	0.233	4.109	0	0	0.035	0.328	0	0.041	0.261	0.266	0.165	0.081	0.766	0	1.165	1.898	0.019	0.728	0.066	0.332	0.091	0.2	0.033	0.279	0.834	0	0.023	ENSG00000175892		Q8NAT4	ENSG00000175892
DDC	dopa decarboxylase (aromatic L-amino acid decarboxylase)	Enzymes			HPA017742	Enhanced		1.63327	0	9.25383	223.88	289.423	229.894	81.7971	294.407	223.88	137.075	24.1932	39.626	223.88	31.86	7.904	2.262	1.638	0.722	20.754	0.277	0.181	2.486	137.075	47.914	130.138	1.661	0.131	0.176	2.019	0.421	0.401	0.253	0.211	0.117	0	1	0	0.11	ENSG00000132437	The encoded protein catalyzes the decarboxylation of L-3,4-dihydroxyphenylalanine (DOPA) to dopamine, L-5-hydroxytryptophan to serotonin and L-tryptophan to tryptamine. Defects in this gene are the cause of aromatic L-amino-acid decarboxylase deficiency (AADCD). AADCD deficiency is an inborn error in neurotransmitter metabolism that leads to combined serotonin and catecholamine deficiency. Multip…	P20711,C9IYA0,F8WER1,E7EU95,P20711,,E7ER62,C9JMP0,	ENSG00000132437
SMTNL2	smoothelin-like 2				HPA025706	Enhanced		2.5884	0	9.22863	25.268	22.4502	25.1773	26.5674	26.8789	25.268	9.762	2.738	0.456	25.268	0.01	0.113	3.149	5.184	0.389	1.376	0.63	0.181	0.978	0.659	0.039	0.209	0.829	2.397	5.366	1.029	2.328	6.304	0.226	9.762	2.253	0.307	4.394	0.007	0.083	ENSG00000188176		Q2TAL5,Q2TAL5,I3L3R4	ENSG00000188176
TRPC7	transient receptor potential cation channel, subfamily C, member 7	Voltage-gated ion channels		YES	HPA031126,CAB022592	Enhanced		1.13531	0	9.19539	1.804	2.31293	2.41486	1.04363	1.44333	1.804	1.589	0.196185	0.098	1.804	0	0	0	0.088	0.063	0.046	0	0	0.057	0.332	0.399	0.777	0	0	0	1.589	0	0	0.044	0	0	0	0	0	0	ENSG00000069018		Q9HCX4,,,,,,F5H5U9,Q9HCX4	ENSG00000069018
NECAB2	N-terminal EF-hand calcium binding protein 2				HPA013998,HPA014144	Enhanced		0.990285	0	9.14961	21.915	30.2689	12.1847	7.069	38.1371	22.13	22.13	2.39519	0.581	21.915	4.871	0.728	0.289	0.155	22.13	1.216	0.467	0.267	0.748	0.81	0.455	0.564	0.415	1.79	0.207	4.16	0.758	0.72	0.346	0.068	0.448	0.091	0.276	0.176	0.019	ENSG00000103154		Q7Z6G3,H3BTW2,H3BPH6,	ENSG00000103154
PAH	phenylalanine hydroxylase	Enzymes			HPA028407	Enhanced		0.624078	0	9.10003	570.498	596.154	782.935	124.7	778.204	914.145	914.145	62.6919	1.197	570.498	914.145	8.969	0.127	4.418	2.364	0.601	0.021	0.182	0.009	0.073	3.629	0.169	0.196	0.017	0.063	9.976	174.529	0.035	0.684	0.219	0	0	0.288	0	0.272	ENSG00000171759	PAH encodes the enzyme phenylalanine hydroxylase that is the rate-limiting step in phenylalanine catabolism. Deficiency of this enzyme activity results in the autosomal recessive disorder phenylketonuria. [provided by RefSeq, Jul 2008]	P00439,P00439,F8W0A0,F8W1D4	ENSG00000171759
CA12	carbonic anhydrase XII	Enzymes	YES	YES	HPA008773,CAB025181	Enhanced		1.91064	0	9.03062	215.57	217.339	241.262	197.939	205.741	215.57	112.826	23.871	94.784	215.57	0.187	34.642	3.767	7.155	5.994	4.872	1.077	0.403	18.802	3.296	0.388	0.844	2.08	37.635	2.795	0.712	8.592	27.059	4.294	44.642	0.313	112.826	0.529	0.078	11.181	ENSG00000074410	Carbonic anhydrases (CAs) are a large family of zinc metalloenzymes that catalyze the reversible hydration of carbon dioxide. They participate in a variety of biological processes, including respiration, calcification, acid-base balance, bone resorption, and the formation of aqueous humor, cerebrospinal fluid, saliva, and gastric acid. This gene product is a type I membrane protein that is highly…	O43570,O43570,B3KUB4	ENSG00000074410
HOXB8	homeobox B8	Transcription factors			NA	Enhanced		1.5815	0	9.02284	11.458	8.65049	6.05225	22.6244	8.50428	11.458	7.245	1.26989	2.147	11.458	0.041	0	0.18	0.11	0.08	0.28	0.029	0.093	1.333	0.937	2.067	0	2.651	3.607	0.322	1.018	0.097	7.245	0.052	0	0	0.477	0.017	0.046	0	ENSG00000120068	This gene is a member of the Antp homeobox family and encodes a nuclear protein with a homeobox DNA-binding domain. It is included in a cluster of homeobox B genes located on chromosome 17. The encoded protein functions as a sequence-Highly tissue enriched transcription factor that is involved in development. Increased expression of this gene is associated with colorectal cancer. Mice that have h…	,P17481,I3L3R1,I3L221	ENSG00000120068
CNTD2	cyclin N-terminal domain containing 2				HPA045615	Enhanced		1.88062	0	9.02231	2.426	1.39632	0.28452	7.33752	0.68543	2.426	1.29	0.268889	0.045	2.426	0.291	0	0.229	0.519	0.174	0.246	0.13	0.061	0.049	0.073	0.261	0.123	1.29	0.19	0.102	0.358	0.082	0.024	0.384	0	0.072	0.056	0.034	0.041	0	ENSG00000105219		Q9H8S5,Q9H8S5,D6RCS3,Q9H8S5	ENSG00000105219
AK4	adenylate kinase 4	Enzymes	YES		HPA042753,HPA049461	Enhanced		2.61576	0	9.01995	127.937	160.76	144.108	46.1845	160.694	127.937	48.91	14.1838	8.478	127.937	48.91	0.476	1.511	13.57	13.551	11.057	0.961	1.003	5.395	3.775	2.321	2.983	19.106	4.754	5.453	9.921	12.487	8.056	2.169	15.478	31.055	22.275	1.613	2.379	6.288	ENSG00000162433	This gene encodes a member of the adenylate kinase family of enzymes. The encoded protein is localized to the mitochondrial matrix. Adenylate kinases regulate the adenine and guanine nucleotide compositions within a cell by catalyzing the reversible transfer of phosphate group among these nucleotides. Five isozymes of adenylate kinase have been identified in vertebrates. Expression of these isozy…	D3DQ64,P27144,P27144,P27144	ENSG00000162433
ARSF	arylsulfatase F		YES	YES	HPA000549	Enhanced		1.34417	0	8.88925	5.913	11.1391	5.94681	1.97086	4.5945	5.913	4.399	0.665185	0.018	5.913	0.687	0.093	0.048	0.099	1.229	0	0	0	0	0.028	2.547	0.033	0.078	0	0.007	0.029	0.041	0.563	0.007	2.115	0.01	4.399	0	0	0.016	ENSG00000062096	This gene is a member of the sulfatase family, and more Highly tissue enrichedally, the arylsulfatase subfamily. Members of the subfamily share similarity in sequence and splice sites, and are clustered together on chromosome X, suggesting that they are derived from recent gene duplication events. Sulfatases are essential for the correct composition of bone and cartilage matrix. The activity of t…	P54793,P54793,P54793	ENSG00000062096
NELL1	NEL-like 1 (chicken)		YES		HPA051535	Enhanced		1.06357	0	8.88871	18.689	18.6461	10.4986	30.0543	15.5572	18.689	17.572	2.10256	0.557	18.689	0	0	0.435	4.292	17.572	1.275	0.524	0.017	0.705	0.369	0.362	1.238	0.547	0.459	0.034	3.045	1.224	1.954	0.041	2.325	0	0.268	0.172	0.033	0.632	ENSG00000165973	This gene encodes a cytoplasmic protein that contains epidermal growth factor (EGF)-like repeats. The encoded heterotrimeric protein may be involved in cell growth regulation and differentiation. A similar protein in rodents is involved in craniosynostosis. Two transcript variants encoding different isoforms have been found for this gene. [provided by RefSeq, Jan 2009]	Q92832,Q92832,Q92832,F5H6I3	ENSG00000165973
CALCR	calcitonin receptor	Transporters,GPCRs excl olfactory receptors	YES	YES	HPA028962	Enhanced		2.62581	0	8.82473	1.628	2.96941	1.1008	1.4971	0.94433	1.628	0.62	0.184481	0.108	1.628	0.006	0.041	0.318	0.074	0.083	0.063	0.017	0.036	0.021	0.133	0.23	0.049	0.099	0.127	0.472	0.62	0.225	0.082	0.044	0.127	0.127	0.018	0.213	0.004	0.016	ENSG00000004948	This gene encodes a high affinity receptor for the peptide hormone calcitonin and belongs to a subfamily of seven transmembrane-spanning G protein-coupled receptors. The encoded protein is involved in maintaining calcium homeostasis and in regulating osteoclast-mediated bone resorption. Polymorphisms in this gene have been associated with variations in bone mineral density and onset of osteoporos…	P30988,A4D1G6,A4D1G6,Q659U6,Q5ZGL8,F5H605,P30988	ENSG00000004948
CLDN8	claudin 8	Transporters		YES	NA	Enhanced		1.23144	0	8.60655	56.932	76.1544	38.9932	67.5316	45.049	56.932	46.232	6.61496	46.232	56.932	0.031	0.239	1.698	9.48	0.063	0.077	0	0	0	0.314	0	0	0.166	0.06	0.697	0.005	0.025	0.867	22.61	3.002	0.027	5.762	0	0	30.317	ENSG00000156284	This gene encodes a member of the claudin family. Claudins are integral membrane proteins and components of tight junction strands. Tight junction strands serve as a physical barrier to prevent solutes and water from passing freely through the paracellular space between epithelial or endothelial cell sheets, and also play critical roles in maintaining cell polarity and signal transductions. This …	P56748,P56748	ENSG00000156284
FGF9	fibroblast growth factor 9 (glia-activating factor)				CAB004392	Enhanced		3.00762	0	8.5716	15.393	11.3865	11.6586	24.1614	14.365	15.393	5.118	1.79581	1.894	15.393	0.054	0.643	1.503	1.07	4.353	1.299	0.244	0.174	0.343	2.61	4.486	0.808	0.357	1.198	0.218	1.896	0.812	1.991	0.205	0.427	5.118	0.151	0.449	0.28	0.511	ENSG00000102678	The protein encoded by this gene is a member of the fibroblast growth factor (FGF) family. FGF family members possess broad mitogenic and cell survival activities, and are involved in a variety of biological processes, including embryonic development, cell growth, morphogenesis, tissue repair, tumor growth and invasion. This protein was isolated as a secreted factor that exhibits a growth-stimula…	P31371	ENSG00000102678
ATP6V1B1	ATPase, H+ transporting, lysosomal 56/58kDa, V1 subunit B1				HPA031847,CAB009523	Enhanced		0.642456	0	8.38091	69.01	72.6393	88.5477	48.229	66.6237	107.416	107.416	8.23419	0.505	69.01	0.013	2.637	2.767	2.15	1.076	0.291	0.161	0.492	0.631	0.19	0.677	1.745	2.247	1.383	20.257	0.555	0.787	1.346	0.527	0.833	0.554	3.09	0.941	0.042	107.416	ENSG00000116039	This gene encodes a component of vacuolar ATPase (V-ATPase), a multisubunit enzyme that mediates acidification of eukaryotic intracellular organelles. V-ATPase dependent organelle acidification is necessary for such intracellular processes as protein sorting, zymogen activation, receptor-mediated endocytosis, and synaptic vesicle proton gradient generation. V-ATPase is composed of a cytosolic V1 …	P15313,C9J5E3,C9JL73,C9JNS9,C9JTN0,C9JZ02	ENSG00000116039
FREM2	FRAS1 related extracellular matrix protein 2		YES	YES	HPA028831	Enhanced		1.63119	0	8.33728	10.836	10.6657	14.6294	5.86611	12.1827	10.836	6.643	1.2997	0.246	10.836	0.651	2.721	2.727	1.496	0.423	1.402	0.274	0.003	0.013	0.097	0.2	0.304	0.282	0.99	1.877	0.613	1.844	0.184	6.643	0.196	0.059	0.188	0.802	0.001	0.02	ENSG00000150893	This gene encodes a membrane protein that belongs to the FRAS1 family. This extracellular matrix protein is thought to be required for maintaining the integrity of the skin epithelium and the differentiated state of renal epithelia. The protein localizes to the basement membrane, forming a ternary complex that plays a role in epidermal-dermal interactions during morphogenetic processes. Mutations…	Q5SZK8	ENSG00000150893
CRB2	crumbs homolog 2 (Drosophila)		YES	YES	HPA043674	Enhanced		0.960631	0	8.31263	5.051	4.3366	4.09787	2.6393	9.12883	5.258	5.258	0.60763	0.879	5.051	0.005	0.015	0.089	0.006	5.258	0.27	0.64	0.719	0.594	0.18	0.044	0.168	0.023	1.046	0.153	0.322	0.024	0.11	0.056	0.046	0.063	0.181	0.26	0.173	0.031	ENSG00000148204		Q5IJ48,Q5IJ48,Q5IJ48,Q5IJ48	ENSG00000148204
SLC25A48	solute carrier family 25, member 48	Transporters		YES	HPA014674	Enhanced		1.11626	0	8.30804	12.847	16.1682	16.5075	7.26468	11.4474	12.847	11.509	1.54633	1.548	12.847	0.867	2.42	0	0.84	11.509	0.116	0.079	0.044	0.72	3.605	0.06	1.179	0.521	0.458	0.46	0.447	0	0	0.068	0.542	0	1.746	0.111	0	1.564	ENSG00000145832		C9JM56,Q6ZT89,Q6ZT89,Q6ZT89,D6RFW8,Q6ZT89	ENSG00000145832
TMEM252	transmembrane protein 252			YES	HPA045272	Enhanced		1.10006	0	8.21904	19.063	15.0578	35.0467	5.8015	20.3463	19.063	17.329	2.31937	1.414	19.063	0.43	0	0.404	4.774	0.154	0.423	0.358	0.202	0.849	17.329	2.111	1.046	1.403	2.974	0.285	0.151	0.824	1.442	0.274	3.508	2.282	0.183	0.528	0.025	0.187	ENSG00000181778		Q8N6L7	ENSG00000181778
PAQR5	progestin and adipoQ receptor family member V			YES	HPA016507	Enhanced		2.5095	0	8.1788	38.019	40.6205	45.2579	33.6239	32.5741	38.019	15.15	4.64848	13.384	38.019	0.57	2.904	7.826	0.615	1.065	4.653	0.25	0.182	2.152	6.613	15.15	2.024	0.563	0.826	1.733	1.403	1.955	5.048	0.428	11.845	0.491	4.313	0.533	0.454	0.51	ENSG00000137819		Q9NXK6,H0YL06,Q9NXK6,Q9NXK6	ENSG00000137819
WNT9B	wingless-type MMTV integration site family, member 9B		YES		NA	Enhanced		2.01536	0	8.0199	2.493	2.88814	1.71952	4.07059	1.29494	2.493	1.237	0.310852	0.031	2.493	0	0.046	0.015	0.063	0.375	0.105	1.041	0.04	0.033	0.579	0.111	0.815	0.348	0.11	0.301	0.086	0.042	0.06	0.123	0.043	0.237	1.237	0.033	0	0.026	ENSG00000158955	The WNT gene family consists of structurally related genes that encode secreted signaling proteins. These proteins have been implicated in oncogenesis and in several developmental processes, including regulation of cell fate and patterning during embryogenesis. This gene is a member of the WNT gene family. Study of its expression in the teratocarcinoma cell line NT2 suggests that it may be implic…	I3L0L8,O14905,E7EPC3	ENSG00000158955
TCF24	transcription factor 24				NA	Enhanced		0.740625	0	7.87666	1.185	1.46158	0.64236	0.9285	1.70854	1.6	1.6	0.150444	0	1.185	0	0	0.034	0.152	0.089	0.096	0	0	0	0	0.071	0	0	0.05	0.098	1.6	0.01	0	0.013	0	0.602	0.009	0.047	0.006	0	ENSG00000261787		H3BPR9	ENSG00000261787
SLC14A2	solute carrier family 14 (urea transporter), member 2	Transporters		YES	HPA050069	Enhanced		1.55491	0	7.86398	7.49	7.53589	0.11062	22.0258	0.28861	7.49	4.817	0.952444	0.105	7.49	0.083	0.066	0.334	0.203	1.366	0.033	0.085	0.074	0.759	4.788	1.279	0.652	4.817	0.065	0.1	0.915	0.164	0.066	1.605	0.106	0.06	0.059	0.018	0.107	0.317	ENSG00000132874	The protein encoded by this gene belongs to the urea transporter family. In mammalian cells, urea is the chief end product of nitrogen catabolism, and plays an important role in the urinary concentration mechanism. This protein is expressed in the inner medulla of the kidney, and mediates rapid transepithelial urea transport across the inner medullary collecting duct. Alternatively spliced transc…	,,Q15849,,E7EPU1	ENSG00000132874
HNF1B	HNF1 homeobox B	Transcription factors			HPA002083	Enhanced		1.90102	0	7.76103	37.76	25.3341	36.3277	50.4697	38.9069	37.76	19.863	4.86533	10.207	37.76	4.576	14.367	8.542	2.181	0.039	6.526	0.043	0.067	1.462	8.623	0.026	8.904	0.095	2.318	0.055	2.425	19.863	3.2	0	0.008	0.011	0	0.048	0.018	0	ENSG00000108753	This gene encodes a member of the homeodomain-containing superfamily of transcription factors. The protein binds to DNA as either a homodimer, or a heterodimer with the related protein hepatocyte nuclear factor 1-alpha. The gene has been shown to function in nephron development, and regulates development of the embryonic pancreas. Mutations in this gene result in renal cysts and diabetes syndrome…	P35680,P35680,H0YL84,E0YMJ9	ENSG00000108753
SHISA3	shisa homolog 3 (Xenopus laevis)		YES	YES	HPA054754	Enhanced		2.51082	0	7.72045	21.116	24.491	9.61754	33.6075	16.7476	21.116	8.41	2.73507	5.186	21.116	0.269	0.061	5.532	0.958	0.358	2.504	0.424	8.41	2.232	6.465	1.797	2.434	5.187	0.264	0.062	0.778	1.646	1.059	2.751	2.144	2.002	0.025	0.108	0.013	0.062	ENSG00000178343		A0PJX4	ENSG00000178343
ABCA4	ATP-binding cassette, sub-family A (ABC1), member 4	Transporters		YES	NA	Enhanced		1.81925	0	7.63173	7.448	5.26052	1.06884	23.1996	0.26227	7.448	4.094	0.975926	0.395	7.448	0.456	0.059	0.659	0.292	0.495	0.046	0.626	0.788	0.355	4.094	0.017	3.466	0.444	0.227	1.003	1.327	0.343	0.287	0.931	0.96	0.176	1.217	0.127	0.102	0.01	ENSG00000198691	The membrane-associated protein encoded by this gene is a member of the superfamily of ATP-binding cassette (ABC) transporters. ABC proteins transport various molecules across extra- and intracellular membranes. ABC genes are divided into seven distinct subfamilies (ABC1, MDR/TAP, MRP, ALD, OABP, GCN20, White). This protein is a member of the ABC1 subfamily. Members of the ABC1 subfamily comprise…	P78363,B4DWY6,F5H5R2,F5H6E5	ENSG00000198691
FOXI2	forkhead box I2	Transcription factors			NA	Enhanced		2.27517	0	7.61323	1.356	1.72958	0.73412	1.22707	1.73253	1.356	0.596	0.178111	0.068	1.356	0	0	0.123	0.179	0.011	0.124	0.429	0.227	0.12	0.065	0	0	0.116	0.252	0	0.077	0.067	0.048	0.084	0.596	0.102	0.298	0.044	0.008	0.415	ENSG00000186766		Q6ZQN5	ENSG00000186766
TRABD2B	TraB domain containing 2B		YES		HPA045817	Enhanced		3.51374	0	7.54525	12.913	20.9702	15.3583	4.83229	10.4917	12.913	3.675	1.71141	1.733	12.913	1.446	2.358	1.031	2.166	0.154	0.442	0.584	0.322	1.282	0.876	0.812	0.961	2.11	1.05	0.976	1.76	3.675	2.534	0.25	1.37	2.837	0.734	0.489	0.007	1.336	ENSG00000204018		A6NFA1	ENSG00000204018
INSRR	insulin receptor-related receptor	Kinases,Enzymes	YES	YES	HPA025285	Enhanced		1.39257	0	7.49404	1.536	1.34093	1.84774	1.28317	1.67278	1.536	1.103	0.204963	0.018	1.536	0.009	0.066	0.013	0.375	0.043	0.549	0.031	0.043	0.029	0.025	1.071	0	0.206	0.162	0.012	1.103	0.043	0.035	0	0.021	0.042	0.008	0.005	0.007	0.082	ENSG00000027644		P14616	ENSG00000027644
PCK1	phosphoenolpyruvate carboxykinase 1 (soluble)	Enzymes			CAB017027,HPA006277,HPA006507	Enhanced		0.796938	0	7.48786	493.621	486.89	1074.53	140.649	272.414	619.397	619.397	65.9228	90.829	493.621	619.397	0.307	0.028	0.475	0.769	2.327	0.13	0.552	4.529	238.557	2.366	191.939	109.302	2.637	0.252	0.258	17.381	0.083	0.129	0.598	0.437	0	0.686	0.258	2.069	ENSG00000124253	This gene is a main control point for the regulation of gluconeogenesis. The cytosolic enzyme encoded by this gene, along with GTP, catalyzes the formation of phosphoenolpyruvate from oxaloacetate, with the release of carbon dioxide and GDP. The expression of this gene can be regulated by insulin, glucocorticoids, glucagon, cAMP, and diet. Defects in this gene are a cause of cytosolic phosphoenol…	P35558,B4DT64,F5GZM4	ENSG00000124253
FOXC2	forkhead box C2 (MFH-1, mesenchyme forkhead 1)	Transcription factors			NA	Enhanced		3.0744	0	7.47598	2.438	1.92954	1.76701	3.99638	2.05744	2.438	0.793	0.326111	0.201	2.438	0.11	0.117	0.429	0.45	0.189	0	0.036	0.132	0.21	0.088	0.689	0.078	0.592	0.167	0.096	0.793	0.435	0.024	0.268	0.138	0.661	0.03	0.292	0.017	0.125	ENSG00000176692	This gene belongs to the forkhead family of transcription factors which is characterized by a distinct DNA-binding forkhead domain. The Highly tissue enriched function of this gene has not yet been determined; however, it may play a role in the development of mesenchymal tissues. [provided by RefSeq, Jul 2008]	Q99958	ENSG00000176692
CHDH	choline dehydrogenase	Enzymes			HPA036633	Enhanced		2.92679	0	7.4097	47.177	64.642	43.0842	21.2801	59.7017	47.177	16.119	6.36693	11.54	47.177	15.961	7.196	3.19	7.227	5.734	8.606	0.337	1.305	2.162	13.471	1.869	9.115	0.357	3.635	0.748	5.192	4.161	0.633	1.696	0.71	1.417	0.863	1.302	0.184	16.119	ENSG00000016391	The protein encoded by this gene is a choline dehydrogenase that localizes to the mitochondrion. Variations in this gene can affect susceptibility to choline deficiency. A few transcript variants have been found for this gene, but the full-length nature of only one has been characterized to date. [provided by RefSeq, Dec 2010]	Q8NE62,C9J7D8,C9JYW4	ENSG00000016391
SLC23A1	solute carrier family 23 (nucleobase transporters), member 1	Transporters		YES	HPA047612	Enhanced		0.789008	0	7.40041	44.272	65.7696	48.2361	9.33623	53.7477	56.111	56.111	5.98237	3.342	44.272	13.062	0.739	0.903	7.386	0.155	0.996	0.619	0.946	0.612	56.111	0.05	23.459	0.155	0.686	0.143	0.142	2.695	0.204	0.057	0.525	0.051	1.21	0.074	0.642	2.288	ENSG00000170482	The absorption of vitamin C into the body and its distribution to organs requires two sodium-dependent vitamin C transporters. This gene encodes one of the two transporters. The encoded protein is active in bulk vitamin C transport involving epithelial surfaces. Previously, this gene had an official symbol of SLC23A2. Alternatively spliced transcript variants encoding different isoforms have been…	Q9UHI7,Q9UHI7,,H0YAJ1	ENSG00000170482
LGSN	lengsin, lens protein with glutamine synthetase domain				HPA030957	Enhanced		1.00255	0	7.38413	1.572	2.76638	1.81307	0.81151	0.89598	1.572	1.568	0.212889	0.296	1.572	1.568	0.12	0.175	0.092	0.019	0.208	0.15	0.083	0.066	0.005	0.021	0.011	0.006	0.019	0.829	0.321	0.062	0.027	0.005	0	0.008	0.004	0	0.031	0.05	ENSG00000146166	This gene encodes a protein with similarity to the GS I members of the glutamine synthetase superfamily. The encoded protein is referred to as a pseudo-glutamine synthetase because it has no glutamine synthesis activity and may function as a chaperone protein. This protein is localized to the lens and may be associated with cataract disease. Alternative splicing results in multiple transcript var…	Q5TDP6,Q5TDP6,Q5TDP6	ENSG00000146166
ENAM	enamelin		YES		HPA037868	Enhanced		1.68816	0	7.34702	8.039	7.56373	4.69214	10.3995	9.49987	8.039	4.762	1.09419	1.724	8.039	0.544	1.544	0.389	0.079	0.014	2.203	0.21	0.76	0.466	0.921	0.032	2.011	0.027	0.143	0.002	0.746	2.95	0.691	0.019	0.414	4.762	0.003	0.083	0	0.767	ENSG00000132464	Dental enamel forms the outer cap of teeth and is the hardest substance found in vertebrates. This gene encodes the largest protein in the enamel matrix of developing teeth. The protein is involved in the mineralization and structural organization of enamel. Defects in this gene result in amelogenesis imperfect type 1C.[provided by RefSeq, Oct 2009]	Q9NRM1	ENSG00000132464
HAVCR1	hepatitis A virus cellular receptor 1		YES	YES	NA	Enhanced		1.20878	0	7.29433	3.387	4.43061	1.52271	3.07269	4.52318	3.387	2.802	0.464333	2.802	3.387	0.14	0	0.169	0.155	0.117	0.227	0.319	1.758	0.728	0	0.029	0	0.213	0.12	0.125	0.71	0.589	0.481	0.039	0	0	0.038	0.096	0.271	0.024	ENSG00000113249	The protein encoded by this gene is a membrane receptor for both human hepatitis A virus (HHAV) and TIMD4. The encoded protein may be involved in the moderation of asthma and allergic diseases. The reference genome represents an allele that retains a MTTVP amino acid segment that confers protection against atopy in HHAV seropositive individuals. Three transcript variants encoding the same protein…	E9PFX0,Q96D42,Q96D42,E5RIF6,E9PFX0,Q96D42	ENSG00000113249
NXNL2	nucleoredoxin-like 2				HPA045526	Enhanced		1.09142	0	7.25754	2.531	2.81982	3.00689	1.39838	2.90071	2.531	2.319	0.348741	0.071	2.531	0	0.242	0.129	0.543	0.09	0.028	0.068	0.068	0	0.054	0.143	0.033	0.017	2.319	0.213	0.558	0.212	0.125	0.18	0.07	0	0.108	1.382	0.128	0.104	ENSG00000130045		Q5VZ03,Q5VZ03,Q5VZ03	ENSG00000130045
PNMA6B	paraneoplastic Ma antigen family member 6B				HPA052115,HPA045007	Enhanced		1.98429	0	7.07285	1.895	1.95346	2.9626	0.52293	2.1405	1.895	0.955	0.267926	0.037	1.895	0.944	0.007	0.082	0.114	0.955	0.114	0.073	0.053	0.035	0.04	0.252	0.051	0.225	0.275	0.077	0.254	0.132	0.059	0.173	0.036	0.234	0.092	0.692	0.039	0.294	ENSG00000203902		P0C5W0	ENSG00000203902
HOXB-AS3	HOXB cluster antisense RNA 3				NA	Enhanced		2.68423	0	7.04617	14.774	14.5547	11.2384	24.3723	8.93059	14.774	5.504	2.09674	5.504	14.774	0.858	0	4.704	0.097	0.045	1.363	2.506	0.057	3.44	3.204	2.036	1.527	1.276	2.408	1.359	3.116	0.455	4.288	0.18	0.347	0.174	2.336	0	0.178	0.38	ENSG00000233101		D3DTV8,I3L0Z4,I3L0Z4,D3DTV8,D3DTV8,I3L4J5,I3L347,I3L452,I3NI35,I3L452	ENSG00000233101
LRRC19	leucine rich repeat containing 19		YES	YES	HPA014541	Enhanced		0.892267	0	6.97084	38.62	46.1898	52.0888	17.2946	38.9054	43.283	43.283	5.54022	43.283	38.62	0.626	0.072	0.447	0.046	0.068	0.44	0.043	0.048	3.679	31.072	0.071	23.004	0.07	0.261	0.032	0.08	6.915	0	0.119	0.032	0.011	0.273	0.156	0.118	0	ENSG00000184434		Q9H756	ENSG00000184434
DPEP1	dipeptidase 1 (renal)	Peptidases,Enzymes	YES		HPA009426,HPA012783	Enhanced		0.794124	0	6.95542	249.374	313.512	404.847	45.1101	234.027	314.024	314.024	35.8532	1.021	249.374	0.069	242.582	0.614	1.064	0.337	1.294	1.64	3.217	2.153	314.024	2.644	83.596	0.755	0.893	0.932	47.137	4.968	5.632	0.21	0.319	0.369	0.178	0.754	0.505	1.755	ENSG00000015413	The protein encoded by this gene is a kidney membrane enzyme involved in the metabolism of glutathione and other similar proteins by dipeptide hydrolysis. The encoded protein is known to regulate leukotriene activity by catalyzing the conversion of leukotriene D4 to leukotriene E4. This protein uses zinc as a cofactor and acts as a disulfide-linked homodimer. Two transcript variants encoding the …	H3BQS5,H3BP43,P16444,P16444,P16444	ENSG00000015413
HPN	hepsin	Peptidases,Enzymes		YES	HPA006804	Enhanced		0.755283	0	6.94585	91.643	113.445	100.357	48.0425	104.727	121.336	121.336	13.1939	1.234	91.643	121.336	55.747	9.802	20.769	1.483	13.836	1.273	0.349	0.206	0.4	0.273	0.825	1.062	5.418	0.463	0.868	3.776	0.141	10.755	0.338	2.513	0.097	0.767	0.052	10.81	ENSG00000105707	This gene encodes a type II transmembrane serine protease. The encoded protein has an extracellular region that consists of two domains, a catalytic serine protease domain and a non-catalytic scavenger receptor cysteine-rich domain. This protein may be involved in diverse cellular functions including blood coagulation, maintenance of cell morphology and the growth and progression of certain cance…	P05981,P05981,B7Z1L4	ENSG00000105707
RNF183	ring finger protein 183			YES	HPA057675	Enhanced		1.16601	0	6.91128	8.26	8.13534	9.34086	5.27374	10.2905	8.26	7.084	1.19515	0.52	8.26	0.217	0.033	0.194	0.281	0.098	4.502	0.061	0.088	0.608	0.345	0.057	0.506	0.24	1.428	0.137	4.466	7.084	0.602	0.175	0.808	0.098	0.377	0.262	0.106	0.716	ENSG00000165188		Q96D59,Q96D59,Q96D59,Q96D59	ENSG00000165188
KIF12	kinesin family member 12				HPA024127,HPA020192	Enhanced		2.2494	0	6.88632	70.62	70.052	65.6633	76.3762	70.3891	70.62	31.395	10.2551	5.755	70.62	8.748	29.71	3.232	6.089	1.668	14.323	0.305	0.499	1.466	26.232	0.051	31.395	0.084	9.068	1.298	3.384	30.265	0.307	26.583	0.053	0.325	0.944	0.593	0.084	3.807	ENSG00000136883	KIF12 is a member of the kinesin superfamily of microtubule-associated molecular motors (see MIM 148760) that play important roles in intracellular transport and cell division (Nakagawa et al., 1997 [PubMed 9275178]).[supplied by OMIM, Mar 2008]	B1ALC3,Q96FN5	ENSG00000136883
TRPV4	transient receptor potential cation channel, subfamily V, member 4	Voltage-gated ion channels		YES	HPA007150	Enhanced		1.22014	0	6.86114	18.767	23.2886	20.6037	10.8018	20.3742	18.767	15.381	2.73526	0.414	18.767	3.595	1.723	1.992	2.14	0.133	1.072	2.31	0.82	0.968	0.131	0.649	0.609	0.156	0.991	6.69	0.895	1.701	1.729	1.043	4.899	0.251	4.474	0.205	0.114	15.381	ENSG00000111199	This gene encodes a member of the OSM9-like transient receptor potential channel (OTRPC) subfamily in the transient receptor potential (TRP) superfamily of ion channels. The encoded protein is a Ca2+-permeable, nonselective cation channel that is thought to be involved in the regulation of systemic osmotic pressure. Mutations in this gene are the cause of spondylometaphyseal and metatropic dyspla…	Q9HBA0,Q9HBA0,F5H6Q4,Q9HBA0,Q9HBA0,Q9HBA0,Q9HBA0,Q9HBA0,Q9HBA0	ENSG00000111199
HOXD8	homeobox D8	Transcription factors			NA	Enhanced		1.76875	0	6.79959	53.685	50.9276	54.0236	62.8439	46.9455	53.685	30.352	7.89533	6.979	53.685	0.165	0.654	0.795	3.727	0.06	0.902	9.171	4.625	4.862	2.604	19.942	1.051	16.027	16.667	0.707	19.024	3.453	7.691	2.528	2.979	0.63	3.248	30.352	0.023	0.623	ENSG00000175879	This gene belongs to the homeobox family of genes. The homeobox genes encode a highly conserved family of transcription factors that play an important role in morphogenesis in all multicellular organisms. Mammals possess four similar homeobox gene clusters, HOXA, HOXB, HOXC and HOXD, located on different chromosomes, consisting of 9 to 11 genes arranged in tandem. This gene is one of several home…	F8WBG7,P13378,F8VSA3,P13378,P13378	ENSG00000175879
HSD11B2	hydroxysteroid (11-beta) dehydrogenase 2			YES	CAB032443	Enhanced		1.01235	0	6.74837	201.361	245.791	181.295	171.306	207.05	201.361	198.905	29.8384	125.758	201.361	2.343	5.906	3.76	9.651	0.791	14.752	6.252	1.102	15.028	83.26	5.899	39.248	0.96	19.366	20.69	3.545	9.527	0.779	7.64	7.713	1.707	8.383	11.184	0.128	198.905	ENSG00000176387	There are at least two isozymes of the corticosteroid 11-beta-dehydrogenase, a microsomal enzyme complex responsible for the interconversion of cortisol and cortisone. The type I isozyme has both 11-beta-dehydrogenase (cortisol to cortisone) and 11-oxoreductase (cortisone to cortisol) activities. The type II isozyme, encoded by this gene, has only 11-beta-dehydrogenase activity. In aldosterone-se…	,P80365	ENSG00000176387
C19orf77	chromosome 19 open reading frame 77		YES	YES	HPA045046	Enhanced		0.786752	0	6.72654	442.641	542.731	492.458	199.396	535.98	562.618	562.618	65.8052	25.292	442.641	9.198	3.32	0.052	0.8	2.4	136.777	0.73	1.15	2.547	447.593	0	562.618	0.171	1.125	0.093	1.154	83.904	0.548	0.232	0.122	0.117	0.279	0.41	53.165	0.302	ENSG00000095932		,O75264,	ENSG00000095932
SLC16A9	solute carrier family 16, member 9	Transporters		YES	HPA049286	Enhanced		0.702018	0	6.66366	106.414	121.005	134.267	28.5359	141.847	151.583	151.583	15.9693	12.39	106.414	0.926	1.675	1.277	8.87	10.468	5.475	36.443	1.761	1.333	1.11	151.583	0.376	0.812	14.375	0.168	10.373	3.786	1.898	14.165	10.324	2.611	0.097	29.449	1.204	1.808	ENSG00000165449		Q7RTY1,Q7RTY1,E5RID1	ENSG00000165449
RP11-190A12.7	Uncharacterized protein				NA	Enhanced		1.09828	0	6.65663	4.224	4.90184	1.98076	5.79314	4.22088	4.224	3.846	0.634556	0.088	4.224	0	0.386	0.401	0.11	0.105	0.981	0.492	0.103	0.849	0.116	0.476	0.45	0.373	0.228	0.47	0.422	0.402	0.321	0.339	1.089	0.26	3.846	0.408	0.042	0.152	ENSG00000256029		H3BQT0,H3BSH0,H3BMC4	ENSG00000256029
LIME1	Lck interacting transmembrane adaptor 1		YES		CAB015363	Enhanced		1.19342	0	6.65569	35.428	43.6106	45.1231	9.89792	43.0812	35.428	29.686	5.32296	7.25	35.428	29.686	0.437	3.564	1.658	0.657	20.627	11.516	6.914	2.95	3.418	0.096	2.016	3.862	0.353	0.169	0.621	0.29	0.523	0.19	0.338	0	5.865	0.498	2.645	2.149	ENSG00000203896	LIME1 is a raft-associated transmembrane adaptor phosphoprotein that is preferentially expressed in hemopoietic cells, particularly T cells (Brdickova et al., 2003 [PubMed 14610046]; Hur et al., 2003 [PubMed 14610044]).[supplied by OMIM, Mar 2008]	Q9H400,Q9H400	ENSG00000203896
SLC47A1	solute carrier family 47, member 1	Transporters		YES	HPA021987	Enhanced		0.86737	0	6.65085	98.842	135.186	100.515	33.6365	126.032	113.956	113.956	14.8616	1.708	98.842	63.646	0.053	7.788	5.454	1.561	0.996	3.242	1.834	1.188	1.332	113.956	1.515	2.584	25.825	0.609	16.606	4.267	1.626	8.768	2.465	4.005	24.867	4.233	1.571	0.721	ENSG00000142494	This gene is located within the Smith-Magenis syndrome region on chromosome 17. It encodes a protein of unknown function. [provided by RefSeq, Jul 2008]	E7ENC3,E7EX57,Q96FL8,I3L345,Q96FL8,,Q96FL8,B4DYV3	ENSG00000142494
GMNC	geminin coiled-coil domain containing				HPA043663	Enhanced		0.979053	0	6.63504	2.15	2.67422	4.20765	0.51647	1.20053	2.196	2.196	0.324037	0.002	2.15	2.196	0.266	0.072	0.319	0.034	0.081	0.006	0.01	0	0.007	0.148	0.018	0.02	0.967	0.13	2.032	0.012	0.011	0	0.075	0.068	0.015	0.11	0	0	ENSG00000205835		A6NCL1,G5E9I9	ENSG00000205835
IL17RB	interleukin 17 receptor B		YES	YES	HPA005482	Enhanced		1.85924	0	6.62689	40.762	47.9698	41.4157	16.3044	57.36	40.762	21.924	6.151	10.423	40.762	21.924	2.627	4.315	4.105	10.225	5.758	0.954	1.775	3.057	9.938	1.639	9.878	0.801	16.966	1.082	3.535	3.302	1.245	2.198	1.217	0.895	1.337	1.594	0.216	4.309	ENSG00000056736	The protein encoded by this gene is a cytokine receptor. This receptor Highly tissue enrichedally binds to IL17B and IL17E, but does not bind to IL17 and IL17C. This receptor has been shown to mediate the activation of NF-kappaB and the production of IL8 induced by IL17E. The expression of the rat counterpart of this gene was found to be significantly up-regulated during intestinal inflammation, …	Q9NRM6,C9IZN0	ENSG00000056736
MT1H	metallothionein 1H				CAB032277	Enhanced		0.93517	0	6.62443	235.892	266.515	388.886	100.652	187.513	252.245	252.245	35.6094	76.173	235.892	41.226	72.398	0.489	4.413	1.095	18.237	0.347	0.332	5.35	183.053	0	38.726	0.196	1.982	1.109	0.115	0.874	7.847	252.245	16.06	0.391	2.904	0	0	0	ENSG00000205358		P80294,H3BTC4	ENSG00000205358
PNMA6A	paraneoplastic Ma antigen family member 6A				HPA052115,HPA045007	Enhanced		1.4545	0	6.57553	3.213	2.9264	4.32683	1.00223	4.59824	3.213	2.209	0.48863	0.093	3.213	1.667	0.009	0.076	0.176	2.209	0.167	0.183	0.106	0.077	0.095	0.426	0.103	0.552	0.592	0.106	0.518	0.357	0.14	0.337	0.113	0.495	0.146	1.004	0.07	0.163	ENSG00000224201		P0CW24,P0CW24	ENSG00000224201
GSTA2	glutathione S-transferase alpha 2	Enzymes			HPA004342	Enhanced		0.551614	0	6.55655	393.655	457.003	588.496	84.8952	444.224	713.642	713.642	60.04	1.007	393.655	713.642	126.644	1.784	2.696	0.416	11.201	0	0.135	0.077	90.281	9.053	119.908	0.46	0.143	0.079	42.91	106.081	0.068	0.021	0.002	0.015	0	0.725	0	0.077	ENSG00000244067	Cytosolic and membrane-bound forms of glutathione S-transferase are encoded by two distinct supergene families. These enzymes function in the detoxification of electrophilic compounds, including carcinogens, therapeutic drugs, environmental toxins and products of oxidative stress, by conjugation with glutathione. The genes encoding these enzymes are known to be highly polymorphic. These genetic v…	P09210	ENSG00000244067
PKLR	pyruvate kinase, liver and RBC	Enzymes			CAB034376,CAB034378	Enhanced		0.499517	0	6.40396	30.494	40.4963	34.1826	10.5075	36.79	61.047	61.047	4.76174	0.524	30.494	61.047	0.057	0.012	0.026	0.145	0.1	0.042	0.062	0.018	7.411	0.035	11.591	0.023	0	0.196	0.79	0.033	0.264	0.034	0	0.078	0.166	0	15.339	0.08	ENSG00000143627	The protein encoded by this gene is a pyruvate kinase that catalyzes the transphosphorylation of phohsphoenolpyruvate into pyruvate and ATP, which is the rate-limiting step of glycolysis. Defects in this enzyme, due to gene mutations or genetic variations, are the common cause of chronic hereditary nonspherocytic hemolytic anemia (CNSHA or HNSHA). Multiple transcript variants encoding different i…	P30613,P30613,F8W6W2	ENSG00000143627
FGF1	fibroblast growth factor 1 (acidic)				HPA003265,CAB017519	Enhanced		0.800622	0	6.40303	68.506	60.434	64.1187	31.7606	117.709	85.566	85.566	10.699	0.908	68.506	1.048	0.462	3.565	1.854	85.566	0.335	8.626	1.077	1.453	0.911	3.766	0.749	15.19	3.145	2.052	1.826	4.105	2.256	7.47	7.11	59.3	0.401	1.075	0.017	6.1	ENSG00000113578	The protein encoded by this gene is a member of the fibroblast growth factor (FGF) family. FGF family members possess broad mitogenic and cell survival activities, and are involved in a variety of biological processes, including embryonic development, cell growth, morphogenesis, tissue repair, tumor growth and invasion. This protein functions as a modifier of endothelial cell migration and prolif…	P05230,P05230,P05230,P05230,B5MCF4,P05230,P05230,C9JDC5,C9JUP6	ENSG00000113578
C18orf56	chromosome 18 open reading frame 56				HPA043697	Enhanced		1.6008	0	6.3996	4.018	5.48114	6.30759	1.47403	2.81097	4.018	2.51	0.627852	2.51	4.018	0.818	0.098	0	0.594	1.904	0.447	0.181	0.282	0.416	1.215	0	0.74	0.283	0.157	0.132	0.802	0.213	0.259	0.096	0.228	0.037	0.077	0.129	1.227	0.089	ENSG00000176912		,Q8TAI1	ENSG00000176912
RP11-210M15.2	Uncharacterized protein				NA	Enhanced		1.37043	0	6.38826	4.384	7.38117	1.77888	6.9337	1.44052	4.384	3.199	0.686259	0.03	4.384	0	0.324	0.439	0.904	2.221	0.598	0.161	0.1	0.362	0.126	0.373	0	0.263	0.606	0	1.221	0.191	0.369	3.199	0.522	0.703	0.202	0.919	0.132	0.18	ENSG00000259495		H0YME3	ENSG00000259495
RP1-170O19.20	Uncharacterized protein				NA	Enhanced		0.592608	0	6.3641	1.443	1.89583	0.5401	3.3358	0	2.435	2.435	0.226741	0.174	1.443	0	0	0	0.814	0.052	0	0	0	0.315	0.111	0	0	0	2.435	0.169	0.054	0	0.5	0	0	0	0.055	0	0	0	ENSG00000257184		D6RAR5	ENSG00000257184
SLC7A8	solute carrier family 7, member 8	Transporters		YES	NA	Enhanced		3.0831	0	6.28267	158.715	100.131	179.346	54.9987	300.385	158.715	51.479	25.2623	15.222	158.715	4.727	9.599	13.226	43.338	10.678	51.479	21.875	5.594	7.513	20.6	16.394	32.566	27.673	20.178	18.66	29.302	20.91	20.885	18.06	33.634	6.813	12.583	48.007	0.904	12.948	ENSG00000092068		Q8N424,Q9UHI5,E9PLV9,F2Z2J4,B4DKT4,E9PS92,E9PQT4,E9PIC3,B4DTV6	ENSG00000092068
HOXB6	homeobox B6	Transcription factors			HPA042063	Enhanced		1.81173	0	6.25502	16.706	14.5204	10.5241	30.4408	11.3405	16.706	9.221	2.67081	9.221	16.706	0.274	0.148	2.986	0.479	0.038	1.684	1.098	0.328	4.876	4.175	4.342	1.189	5.447	6.011	2.557	1.069	0.392	7.263	0.235	0.063	0.233	0.94	0.18	0.043	0.135	ENSG00000108511	This gene is a member of the Antp homeobox family and encodes a protein with a homeobox DNA-binding domain. It is included in a cluster of homeobox B genes located on chromosome 17. The encoded protein functions as a sequence-Highly tissue enriched transcription factor that is involved in development, including that of lung and skin, and has been localized to both the nucleus and cytoplasm. Alter…	P17509,P17509	ENSG00000108511
ACY3	aspartoacylase (aminocyclase) 3				HPA039219	Enhanced		0.881202	0	6.22847	47.666	69.5874	49.7319	21.0971	50.2482	54.092	54.092	7.65293	5.724	47.666	11.844	9.593	0.173	0.46	2.989	8.317	1.405	5.155	3.377	48.905	0.094	54.092	0	0.664	0.259	0.139	1.8	0.48	0.073	0.482	0.027	0.199	0.149	0.92	1.643	ENSG00000132744		Q96HD9,E9PRA7	ENSG00000132744
PARD6B	par-6 partitioning defective 6 homolog beta (C. elegans)				HPA013376	Enhanced		2.77437	0	6.22305	16.194	12.1788	18.064	18.11	16.4226	16.194	5.837	2.60226	3.127	16.194	3.03	2.159	5.837	1.042	0.606	5.229	0.767	0.765	0.61	2.907	1.024	3.206	0.244	1.482	4.088	2.575	2.549	2.038	3.548	2.067	0.424	2.004	1.07	0.542	1.127	ENSG00000124171	This gene is a member of the PAR6 family and encodes a protein with a PSD95/Discs-large/ZO1 (PDZ) domain, an OPR domain and a semi-Cdc42/Rac interactive binding (CRIB) domain. This cytoplasmic protein is involved in asymmetrical cell division and cell polarization processes as a member of a multi-protein complex. [provided by RefSeq, Jul 2008]	Q9BYG5,A2A2A7	ENSG00000124171
RP11-38G5.1	ST20-MTHFS protein				HPA008067	Enhanced		1.25789	0	6.22276	1.673	2.15195	2.1321	0.27829	2.13149	1.673	1.33	0.268852	0.423	1.673	0.149	0.027	0.416	0.851	0.294	1.33	0.167	0.118	0.179	0.545	0.007	0	0	0	0.162	0.117	0	0	0	0	0	0.159	0.09	0.552	0	ENSG00000259332	The protein encoded by this gene is an enzyme that catalyzes the conversion of 5-formyltetrahydrofolate to 5,10-methenyltetrahydrofolate, a precursor of reduced folates involved in 1-carbon metabolism. An increased activity of the encoded protein can result in an increased folate turnover rate and folate depletion. Three transcript variants encoding two different isoforms have been found for this…	H3BQ75	ENSG00000259332
RANBP3L	RAN binding protein 3-like				HPA037471	Enhanced		1.04614	0	6.21411	18.707	16.3854	7.65013	43.161	7.63251	18.707	17.882	3.01041	0.251	18.707	3.623	0.214	1.755	11.034	17.882	1.456	0.248	0.195	0.244	0.317	1.738	0.339	4.824	0.462	3.25	4.806	1.94	2.652	1.287	0.643	1.114	0.063	1.786	0.027	0.424	ENSG00000164188		Q86VV4,E9PGP9,Q86VV4,D6RCM9	ENSG00000164188
MMP24	matrix metallopeptidase 24 (membrane-inserted)	Peptidases	YES	YES	HPA049280	Enhanced		1.3212	0	6.18711	7.26	9.39021	6.69319	3.60595	9.34932	7.26	5.495	1.17341	0.351	7.26	0.163	2.63	4.596	1.489	5.495	0.46	0.205	0.088	0.249	1.082	0.955	1.599	0.302	1.429	0.199	0.458	0.391	0.482	0.404	0.172	0.325	0.316	0.31	0.191	0.081	ENSG00000125966	Proteins of the matrix metalloproteinase (MMP) family are involved in the breakdown of extracellular matrix in normal physiological processes, such as embryonic development, reproduction, and tissue remodeling, as well as in disease processes, such as arthritis and metastasis. Most MMP's are secreted as inactive proproteins which are activated when cleaved by extracellular proteinases. However, t…	Q9Y5R2	ENSG00000125966
CGNL1	cingulin-like 1				CAB013500	Enhanced		2.88997	0	6.17833	73.515	71.8615	69.6433	61.6437	90.9134	73.515	25.438	11.8989	2.419	73.515	25.438	9.316	22.973	23.925	7.062	7.485	0.393	1.173	1.498	1.438	11.014	0.976	1.034	14.909	21.614	8.382	3.191	4.197	18.592	10.265	14.584	4.972	5.813	0.006	25.085	ENSG00000128849	This gene encodes a member of the cingulin family. The encoded protein localizes to both adherens and tight cell-cell junctions and mediates junction assembly and maintenance by regulating the activity of the small GTPases RhoA and Rac1. Heterozygous chromosomal rearrangements resulting in association of the promoter for this gene with the aromatase gene are a cause of aromatase excess syndrome. …	Q0VF96	ENSG00000128849
G6PC	glucose-6-phosphatase, catalytic subunit	Enzymes		YES	NA	Enhanced		0.424601	0	6.16952	52.873	109.622	50.2359	11.0027	40.6316	124.524	124.524	8.57004	0.198	52.873	124.524	0.124	0	0.062	0.098	0.049	0	0.056	0.061	27.845	0.012	19.811	0.011	0	0.004	0.073	5.583	0	0	0	0.007	0	0	0	0	ENSG00000131482	Glucose-6-phosphatase (G6Pase) is a multi-subunit integral membrane protein of the endoplasmic reticulum that is composed of a catalytic subunit and transporters for G6P, inorganic phosphate, and glucose. This gene (G6PC) is one of the three glucose-6-phosphatase catalytic-subunit-encoding genes in human: G6PC, G6PC2 and G6PC3. Glucose-6-phosphatase catalyzes the hydrolysis of D-glucose 6-phospha…	,P35575,	ENSG00000131482
MME	membrane metallo-endopeptidase	Peptidases,Enzymes		YES	CAB000013	Enhanced		0.988478	0	6.157	309.619	366.842	414.535	67.2547	389.845	313.228	313.228	50.2873	4.798	309.619	30.924	0.655	32.268	58.533	0.878	2.013	6.583	13.662	5.218	276.128	1.038	313.228	131.343	21.357	94.846	2.136	17.292	9.985	0.906	2.854	4.862	0.423	1.038	9.885	5.285	ENSG00000196549	This gene encodes a common acute lymphocytic leukemia antigen that is an important cell surface marker in the diagnosis of human acute lymphocytic leukemia (ALL). This protein is present on leukemic cells of pre-B phenotype, which represent 85% of cases of ALL. This protein is not restricted to leukemic cells, however, and is found on a variety of normal tissues. It is a glycoprotein that is part…	P08473,P08473,C9JR96,Q3KQS6,P08473,P08473,P08473,C9IYX7,C9JDZ3,,C9J9X7	ENSG00000196549
CCDC64	coiled-coil domain containing 64			YES	HPA043908	Enhanced		1.50904	0	6.14639	83.373	87.1636	69.7181	102.407	74.2032	83.373	55.249	13.5646	4.876	83.373	1.054	3.465	3.729	3.044	10.919	26.768	9.106	28.597	16.42	5.196	4.595	4.517	0.369	1.49	2.207	32.846	5.883	5.198	21.188	27.747	0.807	55.249	1.587	3.6	2.413	ENSG00000135127		Q6ZP65,,H0YHP2,,B4DNE7,B4DWL0	ENSG00000135127
TLN2	talin 2				CAB017194	Enhanced		1.92166	0	6.12702	63.603	81.8243	55.5885	29.8827	87.1173	63.603	33.098	10.3807	13.046	63.603	5.469	2.908	2.723	3.183	33.098	8.295	1.608	0.762	3.115	6.099	5.132	7.383	26.84	6.329	2.557	8.902	4.841	6.554	16.531	5.328	21.369	2.349	6.133	8.065	8.058	ENSG00000171914	This gene encodes a protein related to talin 1, a cytoskeletal protein that plays a significant role in the assembly of actin filaments and in spreading and migration of various cell types, including fibroblasts and osteoclasts. This protein has a different pattern of expression compared to talin 1 but, like talin 1, is thought to associate with unique transmembrane receptors to form novel linkag…	Q9Y4G6,H0YMT1,H0YN01,Q9Y4G6	ENSG00000171914
PBLD	phenazine biosynthesis-like protein domain containing				HPA038035,HPA038036	Enhanced		1.18673	0	6.11852	177.083	225.397	201.008	72.7212	209.204	177.083	149.219	28.9421	32.853	177.083	141.717	29.199	2.88	5.143	5.878	40.506	1.711	2.53	5.505	126.602	9.744	149.219	8.867	5.344	2.859	2.715	8.399	6.546	3.435	2.74	4.146	1.201	1.991	0.683	1.941	ENSG00000108187		P30039,P30039,F8W7D0,P30039,C9JIM0	ENSG00000108187
OXGR1	oxoglutarate (alpha-ketoglutarate) receptor 1	GPCRs excl olfactory receptors		YES	NA	Enhanced		1.80662	0	6.11376	4.204	2.88455	3.29775	6.27934	4.35269	4.204	2.327	0.68763	2.327	4.204	0.02	0.247	0.265	0.739	0.319	0.29	0.256	0.086	1.439	0.222	0.033	0.399	0.644	0.483	1.107	0.151	0.157	1.584	0.324	1.826	0.069	0.04	0.039	0	1.296	ENSG00000165621		F5H3P1,Q96P68,Q96P68,F5H6U5	ENSG00000165621
ENPEP	glutamyl aminopeptidase (aminopeptidase A)	Peptidases,Enzymes			HPA005128	Enhanced		0.569275	0	6.10866	92.896	129.916	119.529	22.8098	99.3304	163.183	163.183	15.2073	2.237	92.896	17.237	1.144	3.922	2.62	1.148	0.734	9.129	1.007	2.655	163.183	3.109	38.495	12.118	15.311	21.45	0.799	5.534	2.203	5.696	2.107	2.974	0.677	0.671	0.408	1.132	ENSG00000138792		Q07075,	ENSG00000138792
PALM3	paralemmin 3				HPA056119,HPA052794	Enhanced		1.5827	0	6.07733	23.682	17.6867	20.3594	33.2058	23.4752	23.682	14.963	3.89678	0.439	23.682	14.883	5.659	4.288	1.609	0.879	14.963	0.049	0.176	0.224	1.184	0.319	2.621	0.259	0.827	1.746	9.827	4.022	3.313	6.075	0.194	0.212	0.544	0.127	0.006	7.086	ENSG00000187867		A6NDB9,	ENSG00000187867
CDH6	cadherin 6, type 2, K-cadherin (fetal kidney)		YES	YES	CAB025274,HPA007456,HPA007047	Enhanced		1.6206	0	6.05276	19.478	21.3695	27.7909	6.41708	22.3337	19.478	12.019	3.21804	1.552	19.478	1.036	0.321	4.397	1.531	6.465	1.81	0.963	0.708	2.095	1.6	1.422	1.355	6.8	2.687	5.174	0.479	12.019	5.259	2.947	2.662	1.937	0.549	0.872	0.181	0.588	ENSG00000113361	This gene encodes a member of the cadherin superfamily. Cadherins are membrane glycoproteins that mediate homophilic cell-cell adhesion and play critical roles in cell differentiation and morphogenesis. The encoded protein is a type II cadherin and may play a role in kidney development as well as endometrium and placenta formation. Decreased expression of this gene may be associated with tumor gr…	D6RF86,P55285	ENSG00000113361
MTNR1A	melatonin receptor 1A	Transporters,GPCRs excl olfactory receptors		YES	NA	Enhanced		0.995189	0	6.03688	1.655	1.90838	2.75351	0.43975	1.51648	1.663	1.663	0.274148	0.758	1.655	0	0.221	0.032	0.619	0.336	0.24	0	0	0.607	0.129	0	0.22	0	0.096	0.014	1.663	0.243	0.319	0.03	0.025	0.055	0	0.14	0	0	ENSG00000168412	This gene encodes one of two high affinity forms of a receptor for melatonin, the primary hormone secreted by the pineal gland. This receptor is a G-protein coupled, 7-transmembrane receptor that is responsible for melatonin effects on mammalian circadian rhythm and reproductive alterations affected by day length. The receptor is an integral membrane protein that is readily detectable and localiz…	,P48039	ENSG00000168412
DCDC2	doublecortin domain containing 2				HPA031582	Enhanced		1.01814	0	5.98756	21.665	16.0905	18.5446	24.4054	27.6196	21.665	21.279	3.61833	0.934	21.665	2.546	13.692	4.72	1.01	1.345	1.653	0.019	0.046	0.299	0.243	1.447	0.739	0.08	9.799	1.174	3.931	10.472	0.069	21.279	0.041	0.023	0.023	0.205	0.006	0.235	ENSG00000146038	This gene encodes a member of the doublecortin family. The protein encoded by this gene contains two doublecortin domains. The doublecortin domain has been demonstrated to bind tubulin and enhance microtubule polymerization. Mutations in this gene have been associated with Reading Disability (RD), also referred to as developmental dyslexia. Alternatively spliced transcript variants encoding the s…	Q9UHG0,Q9UHG0,Q5T3Y5	ENSG00000146038
PRLR	prolactin receptor	Plasma proteins	YES	YES	NA	Enhanced		0.928721	0	5.96504	35.505	40.0204	47.9778	9.3937	44.628	38.23	38.23	5.95219	8.995	35.505	7.129	3.234	0.66	1.41	0.359	6.064	0.178	0.099	0.642	5.742	12.815	6.346	0.535	21.56	38.23	0.904	1.161	0.429	0.142	1.63	0.424	2.636	1.697	1.01	1.173	ENSG00000113494	This gene encodes a receptor for the anterior pituitary hormone, prolactin, and belongs to the type I cytokine receptor family. Prolactin-dependent signaling occurs as the result of ligand-induced dimerization of the prolactin receptor. Several alternatively spliced transcript variants encoding different membrane-bound and soluble isoforms have been described for this gene, which may function to …	D6R9E1,P16471,P16471,D6R9E1,P16471,P16471,D6RJC8,P16471,P16471,D6R9P5,D6RD41,D6RC67,D6R9V7,D6RAN9,D1MDP1,Q8TD76,P16471	ENSG00000113494
HSD17B14	hydroxysteroid (17-beta) dehydrogenase 14				HPA021467	Enhanced		2.09834	0	5.95639	44.68	50.5979	48.8238	18.7027	60.5971	44.68	21.293	7.50119	2.988	44.68	15.682	0.937	5.785	7.226	8.454	1.628	6.274	4.847	1.88	2.251	16.386	1.377	3.253	11.427	5.824	2.367	8.212	7.017	14.219	1.93	2.649	2.151	21.293	0.543	1.252	ENSG00000087076	17-beta-hydroxysteroid dehydrogenases, such as HSD17B14, are primarily involved in metabolism of steroids at the C17 position and also of other substrates, such as fatty acids, prostaglandins, and xenobiotics (Lukacik et al., 2007 [PubMed 17067289]).[supplied by OMIM, Jun 2009]	Q9BPX1	ENSG00000087076
HOXB9	homeobox B9	Transcription factors			HPA031463	Enhanced		0.53136	0	5.94074	9.802	9.99921	6.82483	16.6277	5.75467	18.447	18.447	1.64996	18.447	9.802	0.059	0	0	0.165	0.119	0.09	0.088	0.184	4.022	3.593	0.642	0	0.317	0.959	0.68	0.354	0.028	4.889	0.017	0	0	0.083	0.011	0	0	ENSG00000170689	This gene is a member of the Abd-B homeobox family and encodes a protein with a homeobox DNA-binding domain. It is included in a cluster of homeobox B genes located on chromosome 17. The encoded nuclear protein functions as a sequence-Highly tissue enriched transcription factor that is involved in cell proliferation and differentiation. Increased expression of this gene is associated with some ca…	P17482,F8W0V6	ENSG00000170689
C21orf62	chromosome 21 open reading frame 62		YES		CAB034173,HPA016899	Enhanced		0.464932	0	5.917	8.737	10.3142	3.74737	16.8904	3.9948	18.792	18.792	1.47659	0.104	8.737	0.143	3.772	0.142	2.585	2.229	0.135	0.115	0.142	0.478	0.045	0.357	0.046	0.075	0.02	0.022	0.44	0.57	0.084	0.04	0.188	0.269	0.048	18.792	0.242	0.048	ENSG00000205929		Q9NYP8,Q9NYP8,H7BYF8,Q9NYP8,Q9NYP8	ENSG00000205929
MFSD4	major facilitator superfamily domain containing 4			YES	HPA055407	Enhanced		0.813543	0	5.89965	68.803	81.0803	28.4172	133.345	32.3684	84.572	84.572	11.6622	23.557	68.803	1.084	2.963	10.731	2.875	35.455	84.572	2.069	2.001	2.579	2.656	0.991	3.253	3.444	2.919	5.878	2.407	23.364	2.017	1.525	3.403	1.478	4.525	2.897	0.201	17.233	ENSG00000174514		Q8N468,B7Z8X3,F5H391	ENSG00000174514
CLNK	cytokine-dependent hematopoietic cell linker	SH2-domain containing proteins			HPA035671,HPA035672	Enhanced		1.20007	0	5.88999	3.623	4.3609	4.43269	3.44303	2.25737	3.623	3.019	0.615111	0.36	3.623	0.065	0.155	0.354	0.183	0.017	0.482	1.673	3.019	1.094	0.694	0.087	0.711	0.052	0.241	0.592	0.289	0.723	0.363	0.128	0.35	0.034	0.61	0.068	0.074	0.567	ENSG00000109684	MIST is a member of the SLP76 family of adaptors (see LCP2, MIM 601603; BLNK, MIM 604515). MIST plays a role in the regulation of immunoreceptor signaling, including PLC-gamma (PLCG1; MIM 172420)-mediated B cell antigen receptor (BCR) signaling and FC-epsilon R1 (see FCER1A, MIM 147140)-mediated mast cell degranulation (Cao et al., 1999 [PubMed 10562326]; Goitsuka et al., 2000, 2001 [PubMed 10744…	Q7Z7G1,D6RJB9,Q7Z7G1,Q7Z7G1	ENSG00000109684
KMO	kynurenine 3-monooxygenase (kynurenine 3-hydroxylase)	Enzymes		YES	HPA031115	Enhanced		0.665864	0	5.84821	29.029	34.4272	30.1791	12.6213	38.8873	43.596	43.596	4.96374	1.343	29.029	43.596	0	5.042	0.312	0.585	1.805	7.151	7.629	5.403	0.908	1.253	1.124	0.546	10.658	8.818	1.241	1.821	2.127	0.273	0.582	0.363	0.384	0.449	1.044	0.535	ENSG00000117009	This gene encodes a mitochondrion outer membrane protein that catalyzes the hydroxylation of L-tryptophan metabolite, L-kynurenine, to form L-3-hydroxykynurenine. Studies in yeast identified this gene as a therapeutic target for Huntington disease. [provided by RefSeq, Oct 2011]	O15229,O15229,O15229,A2A2U7	ENSG00000117009
TRIM6	tripartite motif containing 6				NA	Enhanced		1.94086	0	5.82083	20.806	13.3796	13.6505	4.21479	51.9809	20.806	10.72	3.57441	1.515	20.806	0.831	0.921	1.992	3.182	0.614	0.533	3.314	0.865	1.391	0.924	4.209	0.658	4.127	3.032	6.31	10.72	2.617	4.106	3.981	3.341	0.971	0.91	3.694	1.107	9.838	ENSG00000121236	The protein encoded by this gene is a member of the tripartite motif (TRIM) family. The TRIM motif includes three zinc-binding domains, a RING, B-box type 1 and B-box type 2 domain, and a coiled-coil region. The protein localizes to the nucleus, but its Highly tissue enriched function has not been identified. This gene is mapped to chromosome 11p15, where it resides within a TRIM gene cluster. Al…	Q9C030,C9JNQ0,B4DDQ5,E9PFM0,Q9C030,B4DDQ5,B4DDQ5,B4DDQ5	ENSG00000121236
GCGR	glucagon receptor	GPCRs excl olfactory receptors	YES	YES	NA	Enhanced		0.379362	0	5.81484	10.154	10.6849	5.2805	18.3235	6.32871	26.766	26.766	1.74622	0.131	10.154	26.766	0.626	0	0.015	0.094	0	0.029	0.199	0.445	0.275	5.224	0.298	0.155	0	0.075	0.57	0.324	0.159	0.054	0.086	0.023	1.284	0	0.024	0.138	ENSG00000215644	The protein encoded by this gene is a glucagon receptor that is important in controlling blood glucose levels. Defects in this gene are a cause of non-insulin-dependent diabetes mellitus (NIDDM).[provided by RefSeq, Jan 2010]	P47871,I3L454,I3L1L8	ENSG00000215644
FAM131C	family with sequence similarity 131, member C				HPA031046	Enhanced		1.2518	0	5.78109	3.301	3.60867	1.35719	6.67199	1.5665	3.301	2.637	0.571	0.168	3.301	0.737	0.982	0.009	0.099	2.637	0.292	0.031	0.016	0.026	0.194	1.86	0.038	0.103	0.169	0.047	0.316	0.299	0.05	0.277	0.22	1.306	0.766	0.179	0	1.295	ENSG00000185519		Q96AQ9	ENSG00000185519
PODXL	podocalyxin-like		YES	YES	HPA002110,HPA045507,CAB016169	Enhanced		2.4984	0	5.76353	126.719	98.7372	113.874	93.7308	200.533	126.719	50.72	21.9863	11.568	126.719	2.827	21.287	50.72	12.969	19.533	8.496	10.192	8.394	13.93	9.913	11.612	7.67	28.047	41.684	25.3	4.831	27.731	19.649	44.288	12.634	36.236	6.743	9.685	0.21	20.763	ENSG00000128567	This gene encodes a member of the sialomucin protein family. The encoded protein was originally identified as an important component of glomerular podocytes. Podocytes are highly differentiated epithelial cells with interdigitating foot processes covering the outer aspect of the glomerular basement membrane. Other biological activities of the encoded protein include: binding in a membrane protein…	G3V0E6,O00592,O00592,F5GWY5,F5H7A2,F5H3W1	ENSG00000128567
ESM1	endothelial cell-Highly tissue enriched molecule 1		YES		HPA036660	Enhanced		0.774595	0	5.75133	14.684	10.7826	18.6257	7.55579	21.7717	18.957	18.957	2.55315	0.19	14.684	2.96	0.767	5.095	3.329	0.523	0.224	0.64	0.904	0.795	0.596	4.155	0.527	0.889	2.318	0.167	0.296	1.297	1.846	18.957	0.212	2.301	0.131	0.689	0.322	4.121	ENSG00000164283	This gene encodes a secreted protein which is mainly expressed in the endothelial cells in human lung and kidney tissues. The expression of this gene is regulated by cytokines, suggesting that it may play a role in endothelium-dependent pathological disorders. The transcript contains multiple polyadenylation and mRNA instability signals. Two transcript variants encoding different isoforms have be…	Q9NQ30,Q9NQ30	ENSG00000164283
PTPRO	protein tyrosine phosphatase, receptor type, O	Enzymes	YES	YES	HPA034525	Enhanced		1.36049	0	5.74958	19.289	15.6658	20.8475	11.4181	29.2256	19.289	14.178	3.35485	12.896	19.289	1	0.519	5.272	0.392	14.178	1.302	3.825	4.32	3.731	2.15	1.143	1.824	0.7	3.87	4.335	1.142	1.932	2.25	0.39	0.999	0.566	0.511	0.78	0.679	0.586	ENSG00000151490	This gene encodes a member of the R3 subtype family of receptor-type protein tyrosine phosphatases. These proteins are localized to the apical surface of polarized cells and may have tissue-Highly tissue enriched functions through activation of Src family kinases. This gene contains two distinct promoters, and alternatively spliced transcript variants encoding multiple isoforms have been observed…	Q16827,Q16827,Q16827,Q16827,,Q16827,Q8IYG3,Q16827,H0YH60	ENSG00000151490
ALPL	alkaline phosphatase, liver/bone/kidney	Plasma proteins,Enzymes	YES	YES	HPA007105,CAB020829,HPA008765	Enhanced		1.14004	0	5.7474	58.54	82.0966	55.7964	15.0595	81.2092	58.54	51.349	10.1855	3.343	58.54	30.63	1.4	51.349	3.554	7.854	2.108	11.885	6.532	23.853	2.259	19.816	2.568	6.839	6.814	2.953	5.729	4.26	7.386	2.575	1.908	4.333	0.401	1.475	2.574	2.07	ENSG00000162551	There are at least four distinct but related alkaline phosphatases: intestinal, placental, placental-like, and liver/bone/kidney (tissue non-Highly tissue enriched). The first three are located together on chromosome 2, while the tissue non-Highly tissue enriched form is located on chromosome 1. The product of this gene is a membrane bound glycosylated enzyme that is not expressed in any particul…	P05186,P05186,B1ANL0,B1ANL0,P05186,P05186,B7Z4Y6	ENSG00000162551
ASPA	aspartoacylase	Enzymes			HPA022142,HPA022145	Enhanced		2.40411	0	5.68294	34.386	35.4938	49.3346	17.4922	35.2242	34.386	14.303	6.05074	5.584	34.386	8.944	0.324	3.36	3.51	13.712	3.261	4.294	1.782	2.015	12.116	4.666	12.118	14.303	3.645	2.616	5.841	4.038	5.856	1.608	6.344	1.543	4.019	2.013	0.037	1.435	ENSG00000108381	This gene encodes an enzyme that catalyzes the conversion of N-acetyl_L-aspartic acid (NAA) to aspartate and acetate. NAA is abundant in the brain where hydrolysis by aspartoacylase is thought to help maintain white matter. This protein is an NAA scavenger in other tissues. Mutations in this gene cause Canavan disease. Alternatively spliced transcript variants have been found for this gene. [prov…	I3L0T3,P45381,P45381,I3L4M0	ENSG00000108381
VTCN1	V-set domain containing T cell activation inhibitor 1			YES	HPA054200	Enhanced		0.818692	0	5.66437	12.264	13.9174	8.74413	15.91	10.4831	14.98	14.98	2.16511	0.119	12.264	0.751	14.98	1.037	3.002	0.074	4.507	0.008	0.027	0	0.045	0	0.501	0.208	3.599	1.051	1.028	5.755	6.269	0.041	0.541	0.138	0.107	0.157	0.006	2.243	ENSG00000134258	This gene encodes a protein belonging to the B7 costimulatory protein family. Proteins in this family are present on the surface of antigen-presenting cells and interact with ligand bound to receptors on the surface of T cells. Studies have shown that high levels of the encoded protein has been correlated with tumor progression. A pseudogene of this gene is located on chromosome 20. Multiple tran…	Q7Z7D3,Q5T2L0,Q7Z7D3,Q6P097	ENSG00000134258
KLRG2	killer cell lectin-like receptor subfamily G, member 2			YES	HPA018199	Enhanced		1.04918	0	5.64515	3.712	2.15887	0.46744	11.257	0.96469	3.712	3.538	0.657556	0.207	3.712	0.039	0.07	3.3	0.163	0	0.06	0.025	0.011	0	0.039	0.086	0	0.182	0.02	0.534	0.326	0.012	0	3.538	1.697	0	1.112	0.03	0.054	2.537	ENSG00000188883		A4D1S0,A4D1S0	ENSG00000188883
PLCXD2	phosphatidylinositol-Highly tissue enriched phospholipase C, X domain containing 2				HPA055947	Enhanced		0.891494	0	5.62804	33.086	34.9576	30.2624	34.8551	32.2681	37.113	37.113	5.87878	2.627	33.086	37.113	9.229	10.589	2.446	4.787	8.903	2.116	3.853	2.74	3.298	0.796	4.109	0.501	0.861	1.195	3.153	1.846	8.574	1.915	1.713	2.254	0.735	0.711	4.568	5.009	ENSG00000240891		Q0VAA5,Q0VAA5,C9JB87	ENSG00000240891
STK32B	serine/threonine kinase 32B	Kinases,Enzymes			HPA015820	Enhanced		1.19165	0	5.62688	12.212	14.739	10.5946	12.0603	11.4539	12.212	10.248	2.1703	1.345	12.212	0.092	0.929	0.78	0.562	1.705	6.498	0.132	1.867	1.662	0.627	0.398	0.891	1.53	2.601	3.18	10.248	1.962	3.534	0.68	1.814	0.361	1.093	0.659	1.046	0.19	ENSG00000152953		Q9NY57,D6R9Y2,E9PCC0,Q9NY57	ENSG00000152953
ANKRD33B	ankyrin repeat domain 33B				HPA056974	Enhanced		1.36586	0	5.61443	3.121	3.10981	3.50808	2.20437	3.66128	3.121	2.285	0.555889	0.651	3.121	0.04	0.168	0.42	0.373	1.498	0.359	2.285	0.413	0.425	0.167	0	0.133	0.666	0.516	0.326	0.532	0.035	0.026	0.039	0.163	0.239	0.512	0.075	1.745	0.082	ENSG00000164236		D6R912,A6NCL7	ENSG00000164236
VEPH1	ventricular zone expressed PH domain homolog 1 (zebrafish)				HPA026645	Enhanced		0.82565	0	5.5818	29.015	33.6198	23.8741	35.5753	22.9902	35.142	35.142	5.19815	1.436	29.015	0.999	8.527	35.142	2.839	5.352	1.971	3.678	0.157	0.627	0.013	23.054	0.594	0.515	0.626	2.144	7.049	1.639	1.116	3.276	0.652	0.234	1.595	0.495	4.315	3.29	ENSG00000197415		Q14D04,Q14D04,Q14D04,C9IZY4,Q14D04,Q14D04,C9JRT0,F8WBQ3,F8WBD3,C9J4U8,C9J379,Q14D04,F5GZ91	ENSG00000197415
TFEC	transcription factor EC	Transcription factors			CAB032260	Enhanced		1.39443	0	5.53825	33.617	27.4893	37.359	21.4526	48.1655	33.617	24.108	6.06996	3.027	33.617	1.7	0.823	7.045	0.987	1.691	3.706	12.001	24.108	21.106	11.024	3.067	4.532	1.403	1.454	4.044	2.058	5.464	5.552	1.065	1.145	0.935	0.378	0.953	10.13	0.874	ENSG00000105967	This gene encodes a member of the micropthalmia (MiT) family of basic helix-loop-helix leucine zipper transcription factors. MiT transcription factors regulate the expression of target genes by binding to E-box recognition sequences as homo- or heterodimers, and play roles in multiple cellular processes including survival, growth and differentiation. The encoded protein is a transcriptional activ…	O14948,O14948,O14948,B7Z757,O14948	ENSG00000105967
EFHD1	EF-hand domain family, member D1				HPA049331,HPA056959	Enhanced		1.49717	0	5.46933	134.112	131.712	118.562	144.278	141.897	134.112	89.577	24.5207	6.278	134.112	19.817	2.802	7.469	14.88	70.105	3.478	47.513	3.578	3.176	5.536	6.234	3.648	31.767	50.369	89.577	16.278	11.917	10.57	11.83	8.683	22.248	2.585	61.849	0.168	15.593	ENSG00000115468	EFHD1 is an EF-hand domain-containing protein that displays increased expression during neuronal differentiation (Tominaga and Tomooka, 2002 [PubMed 12270117]).[supplied by OMIM, Mar 2008]	E9PFH3,Q9BUP0,,Q8WYH2,C9JTV4,Q8WYH2	ENSG00000115468
ZYG11A	zyg-11 homolog A (C. elegans)				HPA030378	Enhanced		0.634625	0	5.45232	2.522	3.40702	2.21982	1.07538	3.38577	3.974	3.974	0.462556	0.08	2.522	0.654	0	0.073	0.821	0.015	0.034	0.039	0.187	0.236	0.077	0	0.113	0.025	0.028	0.269	3.974	0.026	0.106	2.691	0.277	0.015	0.099	0.106	0.015	0.007	ENSG00000203995		Q6WRX3,Q6WRX3	ENSG00000203995
SALL3	sal-like 3 (Drosophila)				HPA016656	Enhanced		0.482851	0	5.42342	1.436	1.66387	1.32872	0.77447	1.97674	2.974	2.974	0.264778	0	1.436	0	0	0.003	1.688	2.974	0.006	0	0.005	0.021	0	0.01	0	0	0	0.008	0.82	0.01	0.009	0.078	0	0.081	0	0	0	0	ENSG00000256463	This gene encodes a sal-like C2H2-type zinc-finger protein, and belongs to a family of evolutionarily conserved genes found in species as diverse as Drosophila, C. elegans, and vertebrates. Mutations in some of these genes are associated with congenital disorders in human, suggesting their importance in embryonic development. This protein binds to DNA methyltransferase 3 alpha (DNMT3A), and reduc…	Q9BXA9,,Q9BXA9,	ENSG00000256463
HOXA9	homeobox A9	Transcription factors			NA	Enhanced		1.43218	0	5.42072	26.892	22.0602	32.0374	24.1511	29.3202	26.892	18.777	4.96096	11.429	26.892	0.036	0	0.69	15.177	0.091	0.141	0.797	2.097	6.963	4.113	4.552	0.137	6.021	16.295	3.277	0.226	0.38	8.622	0.138	0.668	0.037	18.777	0.549	5.74	0.101	ENSG00000078399	In vertebrates, the genes encoding the class of transcription factors called homeobox genes are found in clusters named A, B, C, and D on four separate chromosomes. Expression of these proteins is spatially and temporally regulated during embryonic development. This gene is part of the A cluster on chromosome 7 and encodes a DNA-binding transcription factor which may regulate gene expression, mor…	P31269,A8MVF3	ENSG00000078399
C7orf10	chromosome 7 open reading frame 10				HPA026705,HPA026698,HPA026704	Enhanced		1.36121	0	5.408	38.823	47.0681	39.92	15.485	52.8184	38.823	28.521	7.17881	7.249	38.823	20.211	1.496	0.934	2.718	1.528	0.515	1.67	23.688	4.107	6.415	28.521	0.816	3.301	2.399	1.128	4.285	12.752	9.664	3.441	3.811	5.176	1.22	5.724	0.353	1.883	ENSG00000175600	This gene encodes a protein that is similar to members of the CaiB/baiF CoA-transferase protein family. Mutations in this gene are associated with glutaric aciduria type III. Alternate splicing results in multiple transcript variants. [provided by RefSeq, Jul 2010]	Q9HAC7,Q9HAC7,,,Q9Y6U8,Q9HAC7,B7Z568	ENSG00000175600
RNF224	ring finger protein 224				NA	Enhanced		1.73894	0	5.3781	1.179	1.26399	1.29479	0.85938	1.29898	1.179	0.678	0.219222	0.09	1.179	0	0.225	0.377	0.395	0.207	0.218	0.091	0.088	0.03	0.168	0.109	0.094	0.077	0.11	0.079	0.269	0.237	0.028	0.11	0.678	0.064	0.327	0.043	0.046	0.58	ENSG00000233198		P0DH78	ENSG00000233198
FMO4	flavin containing monooxygenase 4	Enzymes	YES	YES	HPA049100	Enhanced		1.03316	0	5.30481	30.629	42.3527	31.8961	14.3636	33.9042	30.629	29.646	5.77381	6.628	30.629	29.646	1.443	3.311	2.99	1.753	4.797	3.16	3.31	3.435	10.016	3.086	7.233	5.176	2.403	2.326	2.134	6.715	4.188	3.922	2.691	5.749	3.5	3.405	0.97	1.277	ENSG00000076258	Metabolic N-oxidation of the diet-derived amino-trimethylamine (TMA) is mediated by flavin-containing monooxygenase and is subject to an inherited FMO3 polymorphism in man resulting in a small subpopulation with reduced TMA N-oxidation capacity resulting in fish odor syndrome Trimethylaminuria. Three forms of the enzyme, FMO1 found in fetal liver, FMO2 found in adult liver, and FMO3 are encoded b…	P31512	ENSG00000076258
BICC1	bicaudal C homolog 1 (Drosophila)				HPA045212	Enhanced		1.95975	0	5.30246	27.464	27.6618	23.3325	30.7356	28.1249	27.464	14.014	5.17948	3.999	27.464	1.877	7.66	4.503	3.723	1.483	2.264	2.551	2.532	4.308	1.991	6.589	1.191	5.759	4.249	3.149	3.908	13.624	7.196	1.458	3.848	5.868	1.474	14.014	0.346	2.818	ENSG00000122870	This gene encodes an RNA-binding protein that is active in regulating gene expression by modulating protein translation during embryonic development. Mouse studies identified the corresponding protein to be under strict control during cell differentiation and to be a maternally provided gene product. [provided by RefSeq, Apr 2009]	Q9H694,A6NGY7	ENSG00000122870
ANK2	ankyrin 2, neuronal	Transporters			HPA008007,HPA035970,CAB015178	Enhanced		1.25199	0	5.26907	128.778	136.149	115.864	61.6979	201.401	128.778	102.859	24.4404	12.35	128.778	3.679	2.102	8.131	9.752	102.859	8.186	37.631	12.338	17.945	10.412	15.877	7.091	18.382	25.986	2.37	15.085	33.772	11.07	9.441	21.515	98.457	5.732	37.885	0.072	2.992	ENSG00000145362	This gene encodes a member of the ankyrin family of proteins that link the integral membrane proteins to the underlying spectrin-actin cytoskeleton. Ankyrins play key roles in activities such as cell motility, activation, proliferation, contact and the maintenance of specialized membrane domains. Most ankyrins are typically composed of three structural domains: an amino-terminal domain containing…	B7Z651,D6RHE1,Q01484,E9PHW9,Q01484,Q01484,D6RHC5,D6R9U4,D6RIY9,D6RHC5,E9PCH6,,,Q01484,H0Y8Y2,A5XEK0,A5XEJ9	ENSG00000145362
SLC5A3	solute carrier family 5 (sodium/myo-inositol cotransporter), member 3	Transporters		YES	HPA029790,HPA029791	Enhanced		1.23498	0	5.25308	28.181	35.4153	18.4507	46.487	12.3707	28.181	22.819	5.36467	5.707	28.181	3.743	0.701	2.765	2.68	3.547	2.746	2.097	4.881	4.809	2.547	5.964	2.604	5.479	9.267	8.458	6.956	2.982	3.818	22.819	2.027	0.752	2.703	3.247	1.223	2.143	ENSG00000198743		P53794	ENSG00000198743
FOLR1	folate receptor 1 (adult)	Transporters	YES	YES	NA	Enhanced		0.580821	0	5.17774	107.154	139.303	124.744	57.6908	106.878	184.487	184.487	20.6951	0.421	107.154	0.069	3.698	184.487	1.298	0.638	28.386	0.155	0	0.189	0.27	0.944	0.346	0.133	0.515	36.804	0.101	2.758	0.22	33.556	2.593	0.138	0.186	0.305	0.094	153.31	ENSG00000110195	The protein encoded by this gene is a member of the folate receptor family. Members of this gene family bind folic acid and its reduced derivatives, and transport 5-methyltetrahydrofolate into cells. This gene product is a secreted protein that either anchors to membranes via a glycosyl-phosphatidylinositol linkage or exists in a soluble form. Mutations in this gene have been associated with neur…	P15328,P15328,P15328,P15328	ENSG00000110195
EXOC3L2	exocyst complex component 3-like 2				HPA041595	Enhanced		1.39132	0	5.14595	11.797	8.48059	9.09512	16.665	12.9481	11.797	8.479	2.29248	1.215	11.797	1.358	0.524	2.071	2.288	0.035	2.407	8.479	1.112	1.824	1.31	2.96	1.828	2.554	3.085	0.443	3.106	2.364	1.703	5.377	0.434	0.782	0.664	0.324	0.305	1.548	ENSG00000130201		Q2M3D2,Q2M3D2	ENSG00000130201
GLIS1	GLIS family zinc finger 1	Transcription factors			HPA001409	Enhanced		0.950699	0	5.13226	2.584	3.18372	3.15982	0.8621	3.12967	2.718	2.718	0.503481	0.144	2.584	0	0	0.082	2.718	0.162	0.538	0.211	0.093	0.307	0.238	0.134	0.319	0.819	0.818	0.032	0.961	0.602	0.591	0.206	0.326	0.392	0.492	0.625	0.008	0.192	ENSG00000174332	GLIS1 is a GLI (MIM 165220)-related Kruppel-like zinc finger protein that functions as an activator and repressor of transcription (Kim et al., 2002 [PubMed 12042312]).[supplied by OMIM, Mar 2008]	Q8NBF1	ENSG00000174332
MST1P9	macrophage stimulating 1 (hepatocyte growth factor-like) pseudogene 9	Peptidases	YES		HPA024036	Enhanced		0.810381	0	5.13112	50.853	66.2696	23.9341	83.3203	29.8876	62.752	62.752	9.9107	7.525	50.853	18.805	12.449	15.826	3.256	0.91	17.661	3.123	1.123	1.622	30.437	1.291	62.752	1.449	1.857	1.424	9.472	5.559	1.073	4.475	1.742	0.877	6.829	0.868	0.366	3.965	ENSG00000186715		H0YFF2,F5H4C7,Q2TV78,F5H4C7,F5H0W9	ENSG00000186715
RP11-407N17.3	Cutaneous T-cell lymphoma-associated antigen 5		YES	YES	HPA055459,HPA000922,HPA000387,HPA054066	Enhanced		0.771206	0	5.11781	9.583	12.8978	10.6596	2.55135	12.2242	12.426	12.426	1.87248	1.594	9.583	11.939	0.743	0.403	0.099	0	2.372	0	0	0.137	12.426	0.068	9.021	0	0.141	0.01	0.041	1.928	0.052	0	0	0	0	0	0	0	ENSG00000258941	The protein encoded by this gene is a tumor-associated antigen found in cutaneous T-cell lymphoma and several other cancers. Autoantibodies against the encoded protein have been found in some cancers. Several transcript variants encoding different isoforms have been found for this gene. [provided by RefSeq, Oct 2011]	G3V599	ENSG00000258941
TMEM139	transmembrane protein 139		YES	YES	HPA036983	Enhanced		1.09966	0	5.07082	57.553	61.1982	54.0017	56.1222	58.8897	57.553	52.337	11.3499	14.683	57.553	8.816	5.672	21.861	1.39	1.574	7.383	1.238	0.461	5.871	38.668	3.115	52.337	4.065	2.655	14.665	4.445	15.007	9.634	15.974	1.232	6.16	1.708	0.447	0.094	9.738	ENSG00000178826		Q8IV31,Q8IV31,Q8IV31,Q8IV31,Q8IV31	ENSG00000178826
GPR110	G protein-coupled receptor 110	GPCRs excl olfactory receptors	YES	YES	HPA038438	Enhanced		0.677952	0	5.06605	22.767	24.6439	12.7725	40.701	12.9492	33.582	33.582	4.49404	0.959	22.767	0.011	0.145	3.409	1.777	0.134	5.125	0.117	0.035	0.535	1.159	0.158	0.565	0.385	1.687	0.155	1.307	13.507	33.582	9.557	23.619	0.015	0.144	0	0	0.485	ENSG00000153292		Q5T601,H7C4N3,,Q5T601,Q5T601	ENSG00000153292
PLCL1	phospholipase C-like 1				HPA031849	Enhanced		1.02307	0	5.0428	29.627	26.5672	27.7201	32.487	31.7331	29.627	28.959	5.87511	2.027	29.627	0.52	0.908	3.574	9.848	15.222	1.98	1.926	4.285	3.372	1.196	5.617	0.757	4.853	7.621	7.127	1.962	3.941	4.07	3.758	4.693	28.959	0.533	6.932	1.188	2.132	ENSG00000115896		Q15111,F8WAR2,H3BUD4,Q15111	ENSG00000115896
SLC26A1	solute carrier family 26 (sulfate transporter), member 1	Transporters		YES	HPA041654	Enhanced		1.97982	0	5.02978	11.673	14.7559	14.3237	3.75616	13.8551	11.673	5.896	2.32078	1.681	11.673	4.806	0.424	1.195	1.399	1.836	3.664	2.073	0.761	0.607	2.618	5.362	5.151	0.812	0.688	0.441	0.801	5.896	2.508	1.026	0.224	0.52	0.995	1.27	0.817	3.413	ENSG00000145217	This gene is a member of a family of sulfate/anion transporter genes. Family members are well conserved in their genomic (number and size of exons) and protein (aa length among species) structures, but have markedly different tissue expression patterns. This gene is primarily expressed in the liver, pancreas, and brain. Three splice variants that encode different isoforms have been identified. [p…	Q9H2B4,Q9H2B4,Q9H2B4	ENSG00000145217
SLC4A4	solute carrier family 4, sodium bicarbonate cotransporter, member 4	Transporters		YES	CAB022493	Enhanced		0.761652	0	5.02838	103.964	127.448	146.695	22.8562	118.857	136.498	136.498	20.6754	47.918	103.964	13.89	136.498	7.308	33.207	35.749	19.496	0.723	0.228	2.613	14.108	0.826	51.839	6.325	0.327	3.169	1.025	36.57	7.018	24.004	1.894	5.598	0.062	1.055	0.556	2.267	ENSG00000080493	This gene encodes a sodium bicarbonate cotransporter (NBC) involved in the regulation of bicarbonate secretion and absorption and intracellular pH. Mutations in this gene are associated with proximal renal tubular acidosis. Multiple transcript variants encoding different isoforms have been found for this gene. [provided by RefSeq, Oct 2008]	Q9Y6R1,Q9Y6R1,Q9Y6R1,Q9Y6R1,Q9Y6R1	ENSG00000080493
HOXC9	homeobox C9	Transcription factors			NA	Enhanced		1.03922	0	5.02782	6.333	4.51704	3.68477	10.3605	6.77104	6.333	6.094	1.25959	0.079	6.333	0	0	0.321	0.934	0	0	0.012	1.924	1.168	0.697	4.631	0	6.094	1.292	1.864	2.477	0.103	0.523	0.215	0.138	0.079	3.264	1.861	0	0	ENSG00000180806	This gene belongs to the homeobox family of genes. The homeobox genes encode a highly conserved family of transcription factors that play an important role in morphogenesis in all multicellular organisms. Mammals possess four similar homeobox gene clusters, HOXA, HOXB, HOXC and HOXD, which are located on different chromosomes and consist of 9 to 11 genes arranged in tandem. This gene is one of se…	P31274,P31274	ENSG00000180806
[truncated: 2 more columns]
